# Supplementary material
Source: PubMed Central journal article supplement (PMC5368682)
Supplement: np6b00772_si_001.pdf [file np6b00772_si_001.pdf]

## **Supporting Information**

### **Opportunistic Sampling of Roadkill as an Entry Point to Accessing Natural Products Assembled by Bacteria Associated with Non-Anthropoidal Mammalian Microbiomes**

**Jeremy L. Motley,<sup>†,‡,§,⊥</sup> Blake W. Stamps,<sup>||,⊥</sup> Carter A. Mitchell,<sup>†,‡,§</sup> Alec T.  
Thompson,<sup>†,‡,§</sup> Jayson Cross,<sup>†,‡,§</sup> Jianlan You,<sup>†,‡,§</sup> Douglas R. Powell,<sup>‡</sup> Bradley S.  
Stevenson,<sup>\*,§,||</sup> Robert H. Cichewicz<sup>\*,†,‡,§</sup>**

<sup>†</sup>Natural Products Discovery Group, <sup>‡</sup>Department of Chemistry and Biochemistry, and  
<sup>§</sup>Institute for Natural Products Applications and Research Technologies, Stephenson Life  
Sciences Research Center, University of Oklahoma, Norman, Oklahoma 73019-5251, United  
States

<sup>||</sup>Department of Microbiology and Plant Biology, University of Oklahoma, Norman,  
Oklahoma, 73019-0390, United States

## Contents

- Figure 1.** Thermal ellipsoid plot structure for viscosin (1).
- Figure 2.** Packing diagram for viscosin (1).
- Table 1.** Crystal data and structure refinement for viscosin (1).
- Table 2.** Atom coordinates for viscosin (1).
- Table 3.** Bond distances and angle for viscosin (1).
- Table 4.** Anisotropic displacement parameters for viscosin (1).
- Table 5.** Hydrogen atom parameters for viscosin (1).
- Table 6.** Torsion angles for viscosin (1).
- Table 7.** Hydrogen bond details for viscosin (1).
- Figure 3.**  $^1\text{H}$  NMR spectrum of serrawettin W2 (2) (DMSO- $d_6$ , 600 MHz, 25°C).
- Figure 4.**  $^{13}\text{C}$  NMR spectrum of serrawettin W2 (2) (DMSO- $d_6$ , 150 MHz, 25°C). Offsets from 169.0 to 173.0 ppm and 10.0 to 45.0 ppm are shown for ease of viewing.
- Figure 5.**  $^1\text{H}$ - $^{13}\text{C}$  HSQCTOCSY spectrum of serrawettin W2 (2) (DMSO- $d_6$ , 25°C). CH/CH<sub>3</sub> groups are shown in red, CH<sub>2</sub> groups are shown in blue.
- Figure 6.**  $^1\text{H}$ - $^{15}\text{N}$  HSQC spectrum of serrawettin W2 (2) (DMSO- $d_6$ , 25°C).
- Figure 7.**  $^1\text{H}$ - $^{13}\text{C}$  HSQC spectrum of serrawettin W2 (2) (DMSO- $d_6$ , 25°C). CH/CH<sub>3</sub> groups are shown in red, CH<sub>2</sub> groups are shown in blue.
- Figure 8.**  $^1\text{H}$ - $^1\text{H}$  dqfCOSY spectrum of serrawettin W2 (2) (DMSO- $d_6$ , 25°C).
- Figure 9.**  $^1\text{H}$ - $^1\text{H}$  TOCSY spectrum of serrawettin W2 (2) (DMSO- $d_6$ , 25°C).
- Figure 10.**  $^1\text{H}$ - $^{13}\text{C}$  HMBC spectrum of serrawettin W2 (2) (DMSO- $d_6$ , 25°C).
- Figure 11.**  $^1\text{H}$  NMR spectrum of serrawettin W4 (3) (DMSO- $d_6$ , 600 MHz, 25°C).
- Figure 12.**  $^{13}\text{C}$  NMR spectrum of serrawettin W4 (3) (DMSO- $d_6$ , 150 MHz, 25°C). Offsets from 168.0 to 173.0 ppm and 12.0 to 31.0 ppm are shown for ease of viewing.
- Figure 13.**  $^1\text{H}$ - $^{13}\text{C}$  HSQC spectrum of serrawettin W4 (3) (DMSO- $d_6$ , 25°C). CH/CH<sub>3</sub> peaks are shown in red, CH<sub>2</sub> peaks are shown in blue.
- Figure 14.**  $^1\text{H}$ - $^1\text{H}$  dqfCOSY spectrum of serrawettin W4 (3) (DMSO- $d_6$ , 25°C).
- Figure 15.**  $^1\text{H}$  TOCSY spectrum of serrawettin W4 (3) (DMSO- $d_6$ , 25°C).
- Figure 16.**  $^1\text{H}$ - $^{13}\text{C}$  HMBC spectrum of serrawettin W4 (3) (DMSO- $d_6$ , 25°C).

**Figure 17.**  $^1\text{H}$  NMR Spectrum of serrawettin W5 (4) (DMSO- $d_6$ , 600 MHz, 25°C).

**Figure 18.**  $^{13}\text{C}$  NMR Spectrum of serrawettin W5 (4) (DMSO- $d_6$ , 150 MHz, 25°C).

**Figure 19.**  $^1\text{H}$ - $^{13}\text{C}$  HSQC Spectrum of serrawettin W5 (4) (DMSO- $d_6$ , 25°C). CH/CH<sub>3</sub> peaks are shown in red and CH<sub>2</sub> peaks are shown in blue.

**Figure 20.**  $^1\text{H}$ - $^1\text{H}$  dqfCOSY Spectrum of serrawettin W5 (4) (DMSO- $d_6$ , 25°C).

**Figure 21.**  $^1\text{H}$ - $^1\text{H}$  TOCSY Spectrum of serrawettin W5 (4) (DMSO- $d_6$ , 25°C).

**Figure 22.**  $^1\text{H}$ - $^{13}\text{C}$  HMBC Spectrum of serrawettin W5 (4) (DMSO- $d_6$ , 25°C).

**Figure 23.**  $^1\text{H}$  NMR Spectrum of serrawettin W6 (5) (DMSO- $d_6$ , 600 MHz, 25°C).

**Figure 24.**  $^1\text{H}$ - $^{13}\text{C}$  HSQC Spectrum of serrawettin W6 (5) (DMSO- $d_6$ , 25°C). CH/CH<sub>3</sub> peaks are shown in red, CH<sub>2</sub> peaks are shown in blue.

**Figure 25.**  $^1\text{H}$ - $^1\text{H}$  dqfCOSY Spectrum of serrawettin W6 (5) (DMSO- $d_6$ , 25°C).

**Figure 26.**  $^1\text{H}$ - $^1\text{H}$  TOCSY Spectrum of serrawettin W6 (5) (DMSO- $d_6$ , 25°C).

**Figure 27.**  $^1\text{H}$ - $^{13}\text{C}$  HMBC Spectrum of serrawettin W6 (5) (DMSO- $d_6$ , 25°C).

**Table 8.** Selected COSY & HMBC correlations (DMSO- $d_6$ ) for serrawettin W2 (2).

**Table 9.** Selected COSY and HMBC correlations (DMSO- $d_6$ ) for serrawettin W4 (3).

**Table 10.** Selected COSY and HMBC correlations (DMSO- $d_6$ ) for serrawettin W5 (4).

**Table 11.** Selected COSY and HMBC correlations (DMSO- $d_6$ ) for serrawettin W6 (5).

**Figure 28.** Selected ion trace for  $m/z$  713-717 for serrawettin W2 (2) after FDAA derivatization.

**Figure 29.** Selected ion trace for  $m/z$  741-745 for serrawettin W2 (2) after FDAA derivatization.

**Figure 30.** Selected ion trace for  $m/z$  765-769 for serrawettin W2 (2) after FDAA derivatization.

**Figure 31.** Selected ion trace for  $m/z$  833-837 for serrawettin W2 (2) after FDAA derivatization.

**Figure 32.** Selected ion trace for  $m/z$  713-717 for serrawettin W2 (2) after FDAA derivatization.

**Figure 33.** Selected ion trace for  $m/z$  737-740 for serrawettin W2 (2) after FDAA derivatization.

**Figure 34. Selected ion trace for  $m/z$  741-745 for serrawettin W4 (3) after FDAA derivatization.**

**Figure 35. Selected ion trace for  $m/z$  765-769 for serrawettin W4 (3) after FDAA derivatization.**

**Figure 36. Selected ion trace for  $m/z$  833-837 for serrawettin W4 (3) after FDAA derivatization.**

**Figure 37. Selected ion trace for  $m/z$  765-769 for serrawettin W5 (4) after FDAA derivatization.**

**Figure 38. Selected Ion Trace for  $m/z$  741-745 for serrawettin W5 (4) after FDAA derivatization**

**Figure 39. Selected Ion Trace for  $m/z$  833-837 for serrawettin W5 (4) after FDAA derivatization**

**Figure 40. Selected Ion Trace for  $m/z$  713-717 for serrawettin W5 (4) after FDAA derivatization**

**Figure 41. Selected Ion Trace for  $m/z$  741-745 for serrawettin W6 (5) after FDAA derivatization**

**Figure 42. Selected Ion Trace for  $m/z$  684-688 for serrawettin W6 (5) after FDAA derivatization**

**Figure 43. Selected Ion Trace for  $m/z$  713-717 for serrawettin W6 (5) after FDAA derivatization**

**Figure 44. Selected Ion Trace for  $m/z$  765-769 for serrawettin W6 (5) after FDAA derivatization**

**Figure 45. Selected Ion Trace for  $m/z$  741-745 FDAA derivatized *D-allo* Threonine**

**Figure 46. Selected Ion Trace for  $m/z$  741-745 FDAA derivatized *L-allo* Threonine**

**Figure 47. Selected Ion Trace for  $m/z$  741-745 FDAA derivatized *L*-Threonine**

**Figure 48. Selected Ion Trace for  $m/z$  737-740 FDAA derivatized *D*-Valine**

**Figure 49. Selected Ion Trace for  $m/z$  737-740 FDAA derivatized *L*-Valine**

**Figure 50. Selected Ion Trace for  $m/z$  765-769 FDAA derivatized *D*-Isoleucine**

**Figure 51. Selected Ion Trace for  $m/z$  765-769 FDAA derivatized *L*-Isoleucine**

**Figure 52. Selected Ion Trace for  $m/z$  765-769 FDAA derivatized *D-allo*-Isoleucine**

**Figure 53. Selected Ion Trace for  $m/z$  765-769 FDAA derivatized *L-allo*-Isoleucine**

**Figure 54. Selected Ion Trace for m/z 765-769 FDAA derivatized D-Leucine**  
**Figure 55. Selected Ion Trace for m/z 765-769 FDAA derivatized L-Leucine**  
**Figure 56. Selected Ion Trace for m/z 713-717 FDAA derivatized D-Serine**  
**Figure 57. Selected Ion Trace for m/z 713-717 FDAA derivatized L-Serine**  
**Figure 58. Selected Ion Trace for m/z 833-837 FDAA derivatized D/L-Phenylalanine**  
**Figure 59. Selected Ion Trace for m/z 833-837 FDAA derivatized L-Phenylalanine**  
**Figure 60. Selected Ion Trace for m/z 684-688 FDAA derivatized D/L-Tyrosine**  
**Figure 61. Selected Ion Trace for m/z 684-688 FDAA derivatized L-Tyrosine**  
**Table 12. Summary of Marfey's analysis retention times and peak assignments**  
**Table 13. Reported and observed optical rotation values for 3-hydroxy fatty acids.**  
**Table 14. *Candida albicans* SC5314 biofilm inhibition and growth inhibition by compounds 1-5.**

Figure 1. Thermal ellipsoid plot structure for viscisin (1).

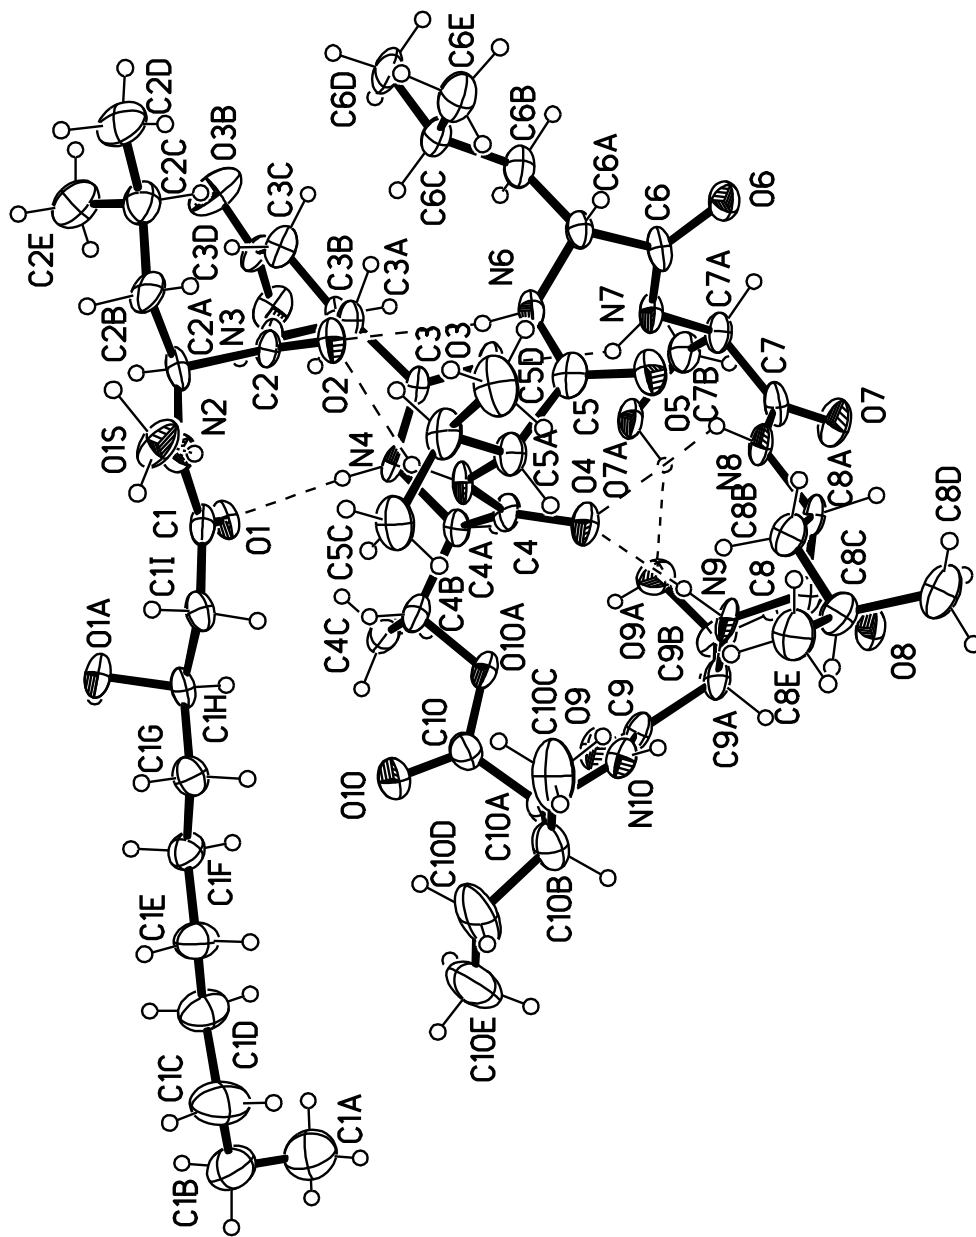

**Figure 2. Packing diagram for viscosin (1).**

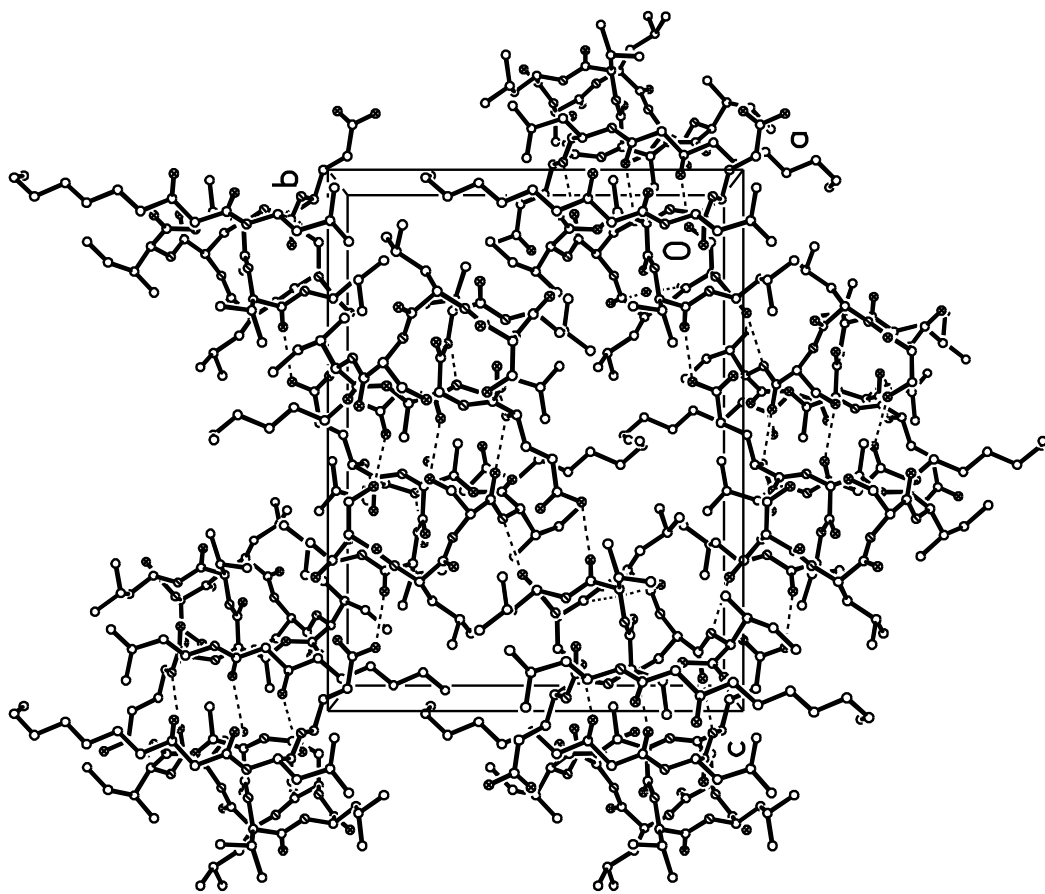

**Table 1. Crystal data and structure refinement for viscosin (1).**

|                                    |                                          |                     |
|------------------------------------|------------------------------------------|---------------------|
| Empirical formula                  | $C_{54} H_{95} N_9 O_{16} \cdot (H_2 O)$ |                     |
|                                    | $C_{54} H_{97} N_9 O_{17}$               |                     |
| Formula weight                     | 1144.40                                  |                     |
| Crystal system                     | Orthorhombic                             |                     |
| Space group                        | $P2_12_12_1$                             |                     |
| Unit cell dimensions               | $a = 14.152(3) \text{ \AA}$              | $\alpha = 90^\circ$ |
|                                    | $b = 18.712(4) \text{ \AA}$              | $\beta = 90^\circ$  |
|                                    | $c = 24.381(5) \text{ \AA}$              | $\gamma = 90^\circ$ |
| Volume                             | $6456(2) \text{ \AA}^3$                  |                     |
| Z, Z'                              | 4, 1                                     |                     |
| Density (calculated)               | $1.177 \text{ Mg/m}^3$                   |                     |
| Wavelength                         | $1.54178 \text{ \AA}$                    |                     |
| Temperature                        | 100(2) K                                 |                     |
| $F(000)$                           | 2480                                     |                     |
| Absorption coefficient             | $0.721 \text{ mm}^{-1}$                  |                     |
| Absorption correction              | semi-empirical from equivalents          |                     |
| Max. and min. transmission         | 0.972 and 0.835                          |                     |
| Theta range for data collection    | 3.626 to $71.353^\circ$                  |                     |
| Reflections collected              | 39420                                    |                     |
| Independent reflections            | 11566 [R(int) = 0.145]                   |                     |
| Data / restraints / parameters     | 11566 / 51 / 767                         |                     |
| $wR(F^2 \text{ all data})$         | $wR2 = 0.3772$                           |                     |
| $R(F \text{ obsd data})$           | $R1 = 0.1281$                            |                     |
| Goodness-of-fit on $F^2$           | 1.238                                    |                     |
| Observed data [ $I > 2\sigma(I)$ ] | 11016                                    |                     |
| Absolute structure parameter       | -1.2(6)                                  |                     |
| Extinction coefficient             | 0.0195(19)                               |                     |
| Largest and mean shift / s.u.      | 0.000 and 0.000                          |                     |
| Largest diff. peak and hole        | 0.783 and $-0.891 \text{ e/\AA}^3$       |                     |

$$wR2 = \{ \sum [w(F_o^2 - F_c^2)^2] / \sum [w(F_o^2)^2] \}^{1/2}$$

$$R1 = \sum ||F_o| - |F_c|| / \sum |F_o|$$



**Table 2. Atomic coordinates and equivalent isotropic displacement parameters for viscosin (1). U(eq) is defined as one third of the trace of the orthogonalized  $U_{ij}$  tensor.**

|       | x          | y          | z          | U(eq)      |
|-------|------------|------------|------------|------------|
| C(1A) | 0.7023(17) | 0.2418(11) | 0.5010(12) | 0.101(8)   |
| C(1B) | 0.5975(13) | 0.2319(8)  | 0.5098(7)  | 0.062(4)   |
| C(1C) | 0.5515(15) | 0.2866(8)  | 0.5470(6)  | 0.066(4)   |
| C(1D) | 0.5482(12) | 0.3621(7)  | 0.5222(5)  | 0.052(3)   |
| C(1E) | 0.5068(11) | 0.4182(6)  | 0.5610(5)  | 0.043(3)   |
| C(1F) | 0.5107(8)  | 0.4926(6)  | 0.5370(5)  | 0.035(2)   |
| C(1G) | 0.4812(8)  | 0.5506(6)  | 0.5775(4)  | 0.034(2)   |
| C(1H) | 0.4876(7)  | 0.6254(6)  | 0.5540(4)  | 0.029(2)   |
| C(1I) | 0.4702(7)  | 0.6821(6)  | 0.5984(4)  | 0.029(2)   |
| O(1A) | 0.4174(5)  | 0.6364(4)  | 0.5117(3)  | 0.0323(16) |
| C(1)  | 0.4861(7)  | 0.7571(6)  | 0.5781(4)  | 0.029(2)   |
| O(1)  | 0.5432(5)  | 0.7718(4)  | 0.5405(3)  | 0.0287(15) |
| N(2)  | 0.4364(6)  | 0.8084(5)  | 0.6032(4)  | 0.0307(18) |
| C(2A) | 0.4461(7)  | 0.8828(6)  | 0.5847(4)  | 0.032(2)   |
| C(2B) | 0.3831(8)  | 0.9319(6)  | 0.6182(4)  | 0.035(2)   |
| C(2C) | 0.3872(9)  | 1.0110(7)  | 0.5991(5)  | 0.040(3)   |
| C(2D) | 0.3319(10) | 1.0577(8)  | 0.6394(6)  | 0.051(3)   |
| C(2E) | 0.3518(11) | 1.0227(8)  | 0.5408(6)  | 0.054(3)   |
| C(2)  | 0.5488(6)  | 0.9074(5)  | 0.5903(4)  | 0.026(2)   |
| O(2)  | 0.5876(5)  | 0.9074(4)  | 0.6356(3)  | 0.0311(16) |
| N(3)  | 0.5896(6)  | 0.9302(5)  | 0.5452(3)  | 0.0279(18) |
| C(3A) | 0.6880(7)  | 0.9555(6)  | 0.5462(4)  | 0.029(2)   |
| C(3B) | 0.7209(7)  | 0.9770(6)  | 0.4890(4)  | 0.030(2)   |
| C(3C) | 0.6641(8)  | 1.0389(6)  | 0.4663(4)  | 0.035(2)   |
| C(3D) | 0.6813(8)  | 1.0502(6)  | 0.4063(5)  | 0.034(2)   |
| O(3A) | 0.7287(7)  | 1.0111(5)  | 0.3775(4)  | 0.048(2)   |
| O(3B) | 0.6384(8)  | 1.1087(6)  | 0.3879(4)  | 0.062(3)   |
| C(3)  | 0.7545(7)  | 0.8989(5)  | 0.5701(4)  | 0.025(2)   |
| O(3)  | 0.8257(5)  | 0.9187(4)  | 0.5948(3)  | 0.0325(16) |
| N(4)  | 0.7319(6)  | 0.8303(5)  | 0.5633(3)  | 0.0258(17) |
| C(4A) | 0.7938(6)  | 0.7750(5)  | 0.5862(4)  | 0.0242(19) |
| C(4B) | 0.7621(7)  | 0.7021(6)  | 0.5666(4)  | 0.030(2)   |
| C(4C) | 0.7767(9)  | 0.6922(7)  | 0.5058(5)  | 0.041(3)   |
| C(4)  | 0.7972(7)  | 0.7781(6)  | 0.6481(4)  | 0.028(2)   |
| O(4)  | 0.8708(5)  | 0.7693(4)  | 0.6746(3)  | 0.0315(16) |
| N(5)  | 0.7156(6)  | 0.7923(5)  | 0.6745(3)  | 0.0256(17) |
| C(5A) | 0.7156(7)  | 0.8046(6)  | 0.7337(4)  | 0.030(2)   |
| C(5B) | 0.6139(7)  | 0.8081(7)  | 0.7570(4)  | 0.036(2)   |

|        |            |            |           |            |
|--------|------------|------------|-----------|------------|
| C(5C)  | 0.5649(8)  | 0.7359(7)  | 0.7507(5) | 0.041(3)   |
| C(5D)  | 0.6151(9)  | 0.8332(9)  | 0.8168(5) | 0.051(3)   |
| C(5)   | 0.7742(7)  | 0.8707(6)  | 0.7465(4) | 0.031(2)   |
| O(5)   | 0.8341(5)  | 0.8704(4)  | 0.7832(3) | 0.0353(17) |
| N(6)   | 0.7551(6)  | 0.9291(5)  | 0.7169(3) | 0.0286(18) |
| C(6A)  | 0.8006(7)  | 0.9972(5)  | 0.7295(4) | 0.026(2)   |
| C(6B)  | 0.7602(8)  | 1.0556(6)  | 0.6937(5) | 0.035(2)   |
| C(6C)  | 0.6513(8)  | 1.0666(6)  | 0.6991(5) | 0.037(2)   |
| C(6D)  | 0.6227(8)  | 1.1299(7)  | 0.6633(5) | 0.046(3)   |
| C(6E)  | 0.6201(9)  | 1.0770(8)  | 0.7580(6) | 0.048(3)   |
| C(6)   | 0.9097(7)  | 0.9942(6)  | 0.7234(4) | 0.029(2)   |
| O(6)   | 0.9593(5)  | 1.0318(4)  | 0.7534(3) | 0.0328(16) |
| N(7)   | 0.9434(6)  | 0.9530(5)  | 0.6836(3) | 0.0280(18) |
| C(7A)  | 1.0463(7)  | 0.9481(6)  | 0.6728(4) | 0.029(2)   |
| C(7B)  | 1.0676(8)  | 0.9467(7)  | 0.6126(5) | 0.038(2)   |
| O(7A)  | 1.0251(5)  | 0.8891(4)  | 0.5846(3) | 0.0333(17) |
| C(7)   | 1.0921(7)  | 0.8838(6)  | 0.7017(4) | 0.033(2)   |
| O(7)   | 1.1790(5)  | 0.8759(5)  | 0.6965(4) | 0.044(2)   |
| N(8)   | 1.0377(6)  | 0.8388(5)  | 0.7301(3) | 0.0283(18) |
| C(8A)  | 1.0753(6)  | 0.7772(6)  | 0.7588(4) | 0.027(2)   |
| C(8B)  | 0.9961(8)  | 0.7492(6)  | 0.7963(4) | 0.034(2)   |
| C(8C)  | 1.0197(8)  | 0.6823(6)  | 0.8300(4) | 0.036(2)   |
| C(8D)  | 1.0962(9)  | 0.6989(8)  | 0.8731(5) | 0.047(3)   |
| C(8E)  | 0.9282(9)  | 0.6568(7)  | 0.8588(5) | 0.044(3)   |
| C(8)   | 1.1123(7)  | 0.7201(6)  | 0.7200(4) | 0.032(2)   |
| O(8)   | 1.1904(5)  | 0.6934(4)  | 0.7283(3) | 0.0375(18) |
| N(9)   | 1.0555(5)  | 0.6991(5)  | 0.6781(3) | 0.0285(18) |
| C(9A)  | 1.0927(7)  | 0.6553(6)  | 0.6347(4) | 0.031(2)   |
| C(9B)  | 1.1418(9)  | 0.6998(6)  | 0.5912(5) | 0.037(2)   |
| O(9A)  | 1.0785(6)  | 0.7531(4)  | 0.5705(3) | 0.0392(18) |
| C(9)   | 1.0140(7)  | 0.6084(6)  | 0.6090(4) | 0.030(2)   |
| O(9)   | 1.0099(5)  | 0.5977(5)  | 0.5602(3) | 0.0364(17) |
| N(10)  | 0.9538(6)  | 0.5800(5)  | 0.6450(3) | 0.0306(19) |
| C(10A) | 0.8707(8)  | 0.5378(6)  | 0.6279(4) | 0.030(2)   |
| C(10B) | 0.8298(9)  | 0.5002(7)  | 0.6779(5) | 0.044(3)   |
| C(10C) | 0.7899(10) | 0.5532(11) | 0.7187(6) | 0.066(4)   |
| C(10D) | 0.7560(12) | 0.4429(10) | 0.6626(7) | 0.071(5)   |
| C(10E) | 0.7926(18) | 0.3872(9)  | 0.6221(9) | 0.092(7)   |
| O(10A) | 0.8225(5)  | 0.6532(4)  | 0.5974(3) | 0.0288(15) |
| C(10)  | 0.8011(8)  | 0.5832(6)  | 0.5968(4) | 0.033(2)   |
| O(10)  | 0.7313(6)  | 0.5588(5)  | 0.5745(4) | 0.050(2)   |
| O(1S)  | 0.3374(5)  | 0.7889(4)  | 0.7021(4) | 0.0414(19) |

**Table 3. Bond distances [ $\text{\AA}$ ] and angles [ $^\circ$ ] for viscosin (1).**

|              |           |                     |           |
|--------------|-----------|---------------------|-----------|
| C(1A)-C(1B)  | 1.51(3)   | C(2E)-C(2C)-C(2B)   | 113.8(11) |
| C(1A)-H(1A1) | 0.96      | C(2D)-C(2C)-C(2B)   | 109.5(10) |
| C(1A)-H(1A2) | 0.9599    | C(2E)-C(2C)-H(2C)   | 107.6     |
| C(1A)-H(1A3) | 0.96      | C(2D)-C(2C)-H(2C)   | 107.6     |
| C(1B)-C(1C)  | 1.51(2)   | C(2B)-C(2C)-H(2C)   | 107.6     |
| C(1B)-H(1B1) | 0.99      | C(2C)-C(2D)-H(2D1)  | 109.4     |
| C(1B)-H(1B2) | 0.99      | C(2C)-C(2D)-H(2D2)  | 108.7     |
| C(1C)-C(1D)  | 1.54(2)   | H(2D1)-C(2D)-H(2D2) | 109.5     |
| C(1C)-H(1C1) | 0.99      | C(2C)-C(2D)-H(2D3)  | 110.4     |
| C(1C)-H(1C2) | 0.99      | H(2D1)-C(2D)-H(2D3) | 109.5     |
| C(1D)-C(1E)  | 1.529(17) | H(2D2)-C(2D)-H(2D3) | 109.5     |
| C(1D)-H(1D1) | 0.99      | C(2C)-C(2E)-H(2E1)  | 110.2     |
| C(1D)-H(1D2) | 0.99      | C(2C)-C(2E)-H(2E2)  | 108.4     |
| C(1E)-C(1F)  | 1.510(16) | H(2E1)-C(2E)-H(2E2) | 109.5     |
| C(1E)-H(1E1) | 0.99      | C(2C)-C(2E)-H(2E3)  | 109.8     |
| C(1E)-H(1E2) | 0.99      | H(2E1)-C(2E)-H(2E3) | 109.5     |
| C(1F)-C(1G)  | 1.525(15) | H(2E2)-C(2E)-H(2E3) | 109.5     |
| C(1F)-H(1F1) | 0.99      | O(2)-C(2)-N(3)      | 123.6(9)  |
| C(1F)-H(1F2) | 0.99      | O(2)-C(2)-C(2A)     | 120.1(9)  |
| C(1G)-C(1H)  | 1.515(15) | N(3)-C(2)-C(2A)     | 116.2(9)  |
| C(1G)-H(1G1) | 0.99      | C(2)-N(3)-C(3A)     | 120.5(8)  |
| C(1G)-H(1G2) | 0.99      | C(2)-N(3)-H(3)      | 130(9)    |
| C(1H)-O(1A)  | 1.447(12) | C(3A)-N(3)-H(3)     | 106(9)    |
| C(1H)-C(1I)  | 1.537(14) | N(3)-C(3A)-C(3B)    | 111.1(8)  |
| C(1H)-H(1H)  | 1         | N(3)-C(3A)-C(3)     | 111.5(8)  |
| C(1I)-C(1)   | 1.505(15) | C(3B)-C(3A)-C(3)    | 110.1(8)  |
| C(1I)-H(1IA) | 0.99      | N(3)-C(3A)-H(3A)    | 108       |
| C(1I)-H(1IB) | 0.99      | C(3B)-C(3A)-H(3A)   | 108       |
| O(1A)-H(1AO) | 0.99(6)   | C(3)-C(3A)-H(3A)    | 108       |
| C(1)-O(1)    | 1.252(13) | C(3C)-C(3B)-C(3A)   | 112.0(9)  |
| C(1)-N(2)    | 1.338(14) | C(3C)-C(3B)-H(3B1)  | 109.2     |
| N(2)-C(2A)   | 1.470(14) | C(3A)-C(3B)-H(3B1)  | 109.2     |
| N(2)-H(2)    | 0.87(5)   | C(3C)-C(3B)-H(3B2)  | 109.2     |
| C(2A)-C(2B)  | 1.518(14) | C(3A)-C(3B)-H(3B2)  | 109.2     |
| C(2A)-C(2)   | 1.531(13) | H(3B1)-C(3B)-H(3B2) | 107.9     |
| C(2A)-H(2A)  | 1         | C(3D)-C(3C)-C(3B)   | 112.2(9)  |
| C(2B)-C(2C)  | 1.554(17) | C(3D)-C(3C)-H(3C1)  | 109.2     |
| C(2B)-H(2B1) | 0.99      | C(3B)-C(3C)-H(3C1)  | 109.2     |
| C(2B)-H(2B2) | 0.99      | C(3D)-C(3C)-H(3C2)  | 109.2     |
| C(2C)-C(2E)  | 1.524(18) | C(3B)-C(3C)-H(3C2)  | 109.2     |
| C(2C)-C(2D)  | 1.529(16) | H(3C1)-C(3C)-H(3C2) | 107.9     |

|              |           |                     |           |
|--------------|-----------|---------------------|-----------|
| C(2C)-H(2C)  | 1         | O(3A)-C(3D)-O(3B)   | 123.5(10) |
| C(2D)-H(2D1) | 0.96      | O(3A)-C(3D)-C(3C)   | 124.8(10) |
| C(2D)-H(2D2) | 0.96      | O(3B)-C(3D)-C(3C)   | 111.8(9)  |
| C(2D)-H(2D3) | 0.96      | C(3D)-O(3B)-H(3BO)  | 113(10)   |
| C(2E)-H(2E1) | 0.9602    | O(3)-C(3)-N(4)      | 123.2(9)  |
| C(2E)-H(2E2) | 0.9599    | O(3)-C(3)-C(3A)     | 118.7(9)  |
| C(2E)-H(2E3) | 0.9599    | N(4)-C(3)-C(3A)     | 118.1(8)  |
| C(2)-O(2)    | 1.235(12) | C(3)-N(4)-C(4A)     | 119.2(8)  |
| C(2)-N(3)    | 1.312(13) | C(3)-N(4)-H(4)      | 125(8)    |
| N(3)-C(3A)   | 1.471(13) | C(4A)-N(4)-H(4)     | 115(8)    |
| N(3)-H(3)    | 0.87(5)   | N(4)-C(4A)-C(4)     | 111.8(8)  |
| C(3A)-C(3B)  | 1.524(14) | N(4)-C(4A)-C(4B)    | 109.8(8)  |
| C(3A)-C(3)   | 1.532(13) | C(4)-C(4A)-C(4B)    | 111.0(8)  |
| C(3A)-H(3A)  | 1         | N(4)-C(4A)-H(4A)    | 108       |
| C(3B)-C(3C)  | 1.515(15) | C(4)-C(4A)-H(4A)    | 108       |
| C(3B)-H(3B1) | 0.99      | C(4B)-C(4A)-H(4A)   | 108       |
| C(3B)-H(3B2) | 0.99      | O(10A)-C(4B)-C(4C)  | 110.4(8)  |
| C(3C)-C(3D)  | 1.497(15) | O(10A)-C(4B)-C(4A)  | 103.3(8)  |
| C(3C)-H(3C1) | 0.99      | C(4C)-C(4B)-C(4A)   | 112.3(9)  |
| C(3C)-H(3C2) | 0.99      | O(10A)-C(4B)-H(4B)  | 110.2     |
| C(3D)-O(3A)  | 1.216(14) | C(4C)-C(4B)-H(4B)   | 110.2     |
| C(3D)-O(3B)  | 1.329(14) | C(4A)-C(4B)-H(4B)   | 110.2     |
| O(3B)-H(3BO) | 0.99(6)   | C(4B)-C(4C)-H(4C1)  | 108.3     |
| C(3)-O(3)    | 1.230(12) | C(4B)-C(4C)-H(4C2)  | 110       |
| C(3)-N(4)    | 1.332(13) | H(4C1)-C(4C)-H(4C2) | 109.5     |
| N(4)-C(4A)   | 1.467(12) | C(4B)-C(4C)-H(4C3)  | 110.1     |
| N(4)-H(4)    | 0.86(5)   | H(4C1)-C(4C)-H(4C3) | 109.5     |
| C(4A)-C(4)   | 1.512(14) | H(4C2)-C(4C)-H(4C3) | 109.5     |
| C(4A)-C(4B)  | 1.514(15) | O(4)-C(4)-N(5)      | 120.0(9)  |
| C(4A)-H(4A)  | 1         | O(4)-C(4)-C(4A)     | 122.8(9)  |
| C(4B)-O(10A) | 1.459(12) | N(5)-C(4)-C(4A)     | 117.2(8)  |
| C(4B)-C(4C)  | 1.509(15) | C(4)-N(5)-C(5A)     | 120.2(8)  |
| C(4B)-H(4B)  | 1         | C(4)-N(5)-H(5)      | 109(8)    |
| C(4C)-H(4C1) | 0.96      | C(5A)-N(5)-H(5)     | 126(8)    |
| C(4C)-H(4C2) | 0.96      | N(5)-C(5A)-C(5)     | 109.4(8)  |
| C(4C)-H(4C3) | 0.9599    | N(5)-C(5A)-C(5B)    | 111.6(8)  |
| C(4)-O(4)    | 1.236(12) | C(5)-C(5A)-C(5B)    | 113.4(9)  |
| C(4)-N(5)    | 1.348(13) | N(5)-C(5A)-H(5A)    | 107.4     |
| N(5)-C(5A)   | 1.461(13) | C(5)-C(5A)-H(5A)    | 107.4     |
| N(5)-H(5)    | 0.87(5)   | C(5B)-C(5A)-H(5A)   | 107.4     |
| C(5A)-C(5)   | 1.521(16) | C(5C)-C(5B)-C(5D)   | 111.8(10) |
| C(5A)-C(5B)  | 1.549(13) | C(5C)-C(5B)-C(5A)   | 110.4(10) |
| C(5A)-H(5A)  | 1         | C(5D)-C(5B)-C(5A)   | 110.5(9)  |

|              |           |                     |           |
|--------------|-----------|---------------------|-----------|
| C(5B)-C(5C)  | 1.527(17) | C(5C)-C(5B)-H(5B)   | 108       |
| C(5B)-C(5D)  | 1.532(16) | C(5D)-C(5B)-H(5B)   | 108       |
| C(5B)-H(5B)  | 1         | C(5A)-C(5B)-H(5B)   | 108       |
| C(5C)-H(5C1) | 0.96      | C(5B)-C(5C)-H(5C1)  | 109.4     |
| C(5C)-H(5C2) | 0.96      | C(5B)-C(5C)-H(5C2)  | 109.4     |
| C(5C)-H(5C3) | 0.96      | H(5C1)-C(5C)-H(5C2) | 109.5     |
| C(5D)-H(5D1) | 0.9601    | C(5B)-C(5C)-H(5C3)  | 109.5     |
| C(5D)-H(5D2) | 0.9599    | H(5C1)-C(5C)-H(5C3) | 109.5     |
| C(5D)-H(5D3) | 0.9599    | H(5C2)-C(5C)-H(5C3) | 109.5     |
| C(5)-O(5)    | 1.233(13) | C(5B)-C(5D)-H(5D1)  | 109.7     |
| C(5)-N(6)    | 1.337(15) | C(5B)-C(5D)-H(5D2)  | 108.7     |
| N(6)-C(6A)   | 1.460(13) | H(5D1)-C(5D)-H(5D2) | 109.5     |
| N(6)-H(6)    | 0.87(5)   | C(5B)-C(5D)-H(5D3)  | 109.9     |
| C(6A)-C(6B)  | 1.512(15) | H(5D1)-C(5D)-H(5D3) | 109.5     |
| C(6A)-C(6)   | 1.552(13) | H(5D2)-C(5D)-H(5D3) | 109.5     |
| C(6A)-H(6A)  | 1         | O(5)-C(5)-N(6)      | 122.3(10) |
| C(6B)-C(6C)  | 1.560(15) | O(5)-C(5)-C(5A)     | 121.3(10) |
| C(6B)-H(6B1) | 0.99      | N(6)-C(5)-C(5A)     | 116.4(9)  |
| C(6B)-H(6B2) | 0.99      | C(5)-N(6)-C(6A)     | 120.7(8)  |
| C(6C)-C(6E)  | 1.514(18) | C(5)-N(6)-H(6)      | 117(8)    |
| C(6C)-C(6D)  | 1.526(17) | C(6A)-N(6)-H(6)     | 121(8)    |
| C(6C)-H(6C)  | 1         | N(6)-C(6A)-C(6B)    | 110.0(8)  |
| C(6D)-H(6D1) | 0.96      | N(6)-C(6A)-C(6)     | 112.8(8)  |
| C(6D)-H(6D2) | 0.9601    | C(6B)-C(6A)-C(6)    | 110.3(8)  |
| C(6D)-H(6D3) | 0.9601    | N(6)-C(6A)-H(6A)    | 107.9     |
| C(6E)-H(6E1) | 0.96      | C(6B)-C(6A)-H(6A)   | 107.9     |
| C(6E)-H(6E2) | 0.96      | C(6)-C(6A)-H(6A)    | 107.9     |
| C(6E)-H(6E3) | 0.96      | C(6A)-C(6B)-C(6C)   | 114.8(9)  |
| C(6)-O(6)    | 1.234(12) | C(6A)-C(6B)-H(6B1)  | 108.6     |
| C(6)-N(7)    | 1.328(14) | C(6C)-C(6B)-H(6B1)  | 108.6     |
| N(7)-C(7A)   | 1.483(12) | C(6A)-C(6B)-H(6B2)  | 108.6     |
| N(7)-H(7)    | 0.87(5)   | C(6C)-C(6B)-H(6B2)  | 108.6     |
| C(7A)-C(7B)  | 1.499(15) | H(6B1)-C(6B)-H(6B2) | 107.5     |
| C(7A)-C(7)   | 1.536(15) | C(6E)-C(6C)-C(6D)   | 111.4(10) |
| C(7A)-H(7A)  | 1         | C(6E)-C(6C)-C(6B)   | 112.7(9)  |
| C(7B)-O(7A)  | 1.411(14) | C(6D)-C(6C)-C(6B)   | 108.4(10) |
| C(7B)-H(7B1) | 0.99      | C(6E)-C(6C)-H(6C)   | 108.1     |
| C(7B)-H(7B2) | 0.99      | C(6D)-C(6C)-H(6C)   | 108.1     |
| O(7A)-H(7AO) | 0.99(6)   | C(6B)-C(6C)-H(6C)   | 108.1     |
| C(7)-O(7)    | 1.246(14) | C(6C)-C(6D)-H(6D1)  | 109.1     |
| C(7)-N(8)    | 1.335(14) | C(6C)-C(6D)-H(6D2)  | 109.8     |
| N(8)-C(8A)   | 1.449(13) | H(6D1)-C(6D)-H(6D2) | 109.5     |
| N(8)-H(8)    | 0.87(5)   | C(6C)-C(6D)-H(6D3)  | 109.5     |

|               |           |                     |           |
|---------------|-----------|---------------------|-----------|
| C(8A)-C(8)    | 1.520(15) | H(6D1)-C(6D)-H(6D3) | 109.5     |
| C(8A)-C(8B)   | 1.540(14) | H(6D2)-C(6D)-H(6D3) | 109.5     |
| C(8A)-H(8A)   | 1         | C(6C)-C(6E)-H(6E1)  | 110.2     |
| C(8B)-C(8C)   | 1.533(15) | C(6C)-C(6E)-H(6E2)  | 109.5     |
| C(8B)-H(8B1)  | 0.99      | H(6E1)-C(6E)-H(6E2) | 109.5     |
| C(8B)-H(8B2)  | 0.99      | C(6C)-C(6E)-H(6E3)  | 108.8     |
| C(8C)-C(8D)   | 1.541(17) | H(6E1)-C(6E)-H(6E3) | 109.5     |
| C(8C)-C(8E)   | 1.548(16) | H(6E2)-C(6E)-H(6E3) | 109.5     |
| C(8C)-H(8C)   | 1         | O(6)-C(6)-N(7)      | 124.1(9)  |
| C(8D)-H(8D1)  | 0.9599    | O(6)-C(6)-C(6A)     | 119.2(9)  |
| C(8D)-H(8D2)  | 0.96      | N(7)-C(6)-C(6A)     | 116.7(8)  |
| C(8D)-H(8D3)  | 0.96      | C(6)-N(7)-C(7A)     | 121.2(8)  |
| C(8E)-H(8E1)  | 0.9599    | C(6)-N(7)-H(7)      | 134(9)    |
| C(8E)-H(8E2)  | 0.9599    | C(7A)-N(7)-H(7)     | 105(9)    |
| C(8E)-H(8E3)  | 0.9599    | N(7)-C(7A)-C(7B)    | 111.8(8)  |
| C(8)-O(8)     | 1.229(14) | N(7)-C(7A)-C(7)     | 112.5(8)  |
| C(8)-N(9)     | 1.358(14) | C(7B)-C(7A)-C(7)    | 110.6(9)  |
| N(9)-C(9A)    | 1.440(13) | N(7)-C(7A)-H(7A)    | 107.2     |
| N(9)-H(9)     | 0.87(5)   | C(7B)-C(7A)-H(7A)   | 107.2     |
| C(9A)-C(9B)   | 1.515(15) | C(7)-C(7A)-H(7A)    | 107.2     |
| C(9A)-C(9)    | 1.551(15) | O(7A)-C(7B)-C(7A)   | 113.6(10) |
| C(9A)-H(9A)   | 1         | O(7A)-C(7B)-H(7B1)  | 108.8     |
| C(9B)-O(9A)   | 1.432(13) | C(7A)-C(7B)-H(7B1)  | 108.8     |
| C(9B)-H(9B1)  | 0.99      | O(7A)-C(7B)-H(7B2)  | 108.8     |
| C(9B)-H(9B2)  | 0.99      | C(7A)-C(7B)-H(7B2)  | 108.8     |
| O(9A)-H(9AO)  | 0.99(6)   | H(7B1)-C(7B)-H(7B2) | 107.7     |
| C(9)-O(9)     | 1.208(13) | C(7B)-O(7A)-H(7AO)  | 103(8)    |
| C(9)-N(10)    | 1.334(13) | O(7)-C(7)-N(8)      | 123.1(10) |
| N(10)-C(10A)  | 1.476(14) | O(7)-C(7)-C(7A)     | 117.6(9)  |
| N(10)-H(10)   | 0.87(5)   | N(8)-C(7)-C(7A)     | 119.2(9)  |
| C(10A)-C(10)  | 1.505(15) | C(7)-N(8)-C(8A)     | 122.7(8)  |
| C(10A)-C(10B) | 1.522(15) | C(7)-N(8)-H(8)      | 115(8)    |
| C(10A)-H(10A) | 1         | C(8A)-N(8)-H(8)     | 122(8)    |
| C(10B)-C(10C) | 1.52(2)   | N(8)-C(8A)-C(8)     | 112.7(8)  |
| C(10B)-C(10D) | 1.542(18) | N(8)-C(8A)-C(8B)    | 106.9(8)  |
| C(10B)-H(10B) | 1         | C(8)-C(8A)-C(8B)    | 112.3(9)  |
| C(10C)-H(10C) | 0.9601    | N(8)-C(8A)-H(8A)    | 108.3     |
| C(10C)-H(10D) | 0.96      | C(8)-C(8A)-H(8A)    | 108.3     |
| C(10C)-H(10E) | 0.96      | C(8B)-C(8A)-H(8A)   | 108.3     |
| C(10D)-C(10E) | 1.53(3)   | C(8C)-C(8B)-C(8A)   | 115.9(9)  |
| C(10D)-H(10F) | 0.99      | C(8C)-C(8B)-H(8B1)  | 108.3     |
| C(10D)-H(10G) | 0.99      | C(8A)-C(8B)-H(8B1)  | 108.3     |
| C(10E)-H(10H) | 0.96      | C(8C)-C(8B)-H(8B2)  | 108.3     |

|                     |           |                     |           |
|---------------------|-----------|---------------------|-----------|
| C(10E)-H(10I)       | 0.9599    | C(8A)-C(8B)-H(8B2)  | 108.3     |
| C(10E)-H(10J)       | 0.9601    | H(8B1)-C(8B)-H(8B2) | 107.4     |
| O(10A)-C(10)        | 1.343(13) | C(8B)-C(8C)-C(8D)   | 110.7(10) |
| C(10)-O(10)         | 1.217(14) | C(8B)-C(8C)-C(8E)   | 108.1(9)  |
| O(1S)-H(1SA)        | 0.99(6)   | C(8D)-C(8C)-C(8E)   | 109.9(9)  |
| O(1S)-H(1SB)        | 0.99(6)   | C(8B)-C(8C)-H(8C)   | 109.4     |
| C(1B)-C(1A)-H(1A1)  | 109.4     | C(8D)-C(8C)-H(8C)   | 109.4     |
| C(1B)-C(1A)-H(1A2)  | 108.6     | C(8E)-C(8C)-H(8C)   | 109.4     |
| H(1A1)-C(1A)-H(1A2) | 109.5     | C(8C)-C(8D)-H(8D1)  | 109.2     |
| C(1B)-C(1A)-H(1A3)  | 110.4     | C(8C)-C(8D)-H(8D2)  | 109.3     |
| H(1A1)-C(1A)-H(1A3) | 109.5     | H(8D1)-C(8D)-H(8D2) | 109.5     |
| H(1A2)-C(1A)-H(1A3) | 109.5     | C(8C)-C(8D)-H(8D3)  | 109.9     |
| C(1A)-C(1B)-C(1C)   | 115.1(16) | H(8D1)-C(8D)-H(8D3) | 109.5     |
| C(1A)-C(1B)-H(1B1)  | 108.5     | H(8D2)-C(8D)-H(8D3) | 109.5     |
| C(1C)-C(1B)-H(1B1)  | 108.5     | C(8C)-C(8E)-H(8E1)  | 109.5     |
| C(1A)-C(1B)-H(1B2)  | 108.5     | C(8C)-C(8E)-H(8E2)  | 108.8     |
| C(1C)-C(1B)-H(1B2)  | 108.5     | H(8E1)-C(8E)-H(8E2) | 109.5     |
| H(1B1)-C(1B)-H(1B2) | 107.5     | C(8C)-C(8E)-H(8E3)  | 110.1     |
| C(1B)-C(1C)-C(1D)   | 113.5(13) | H(8E1)-C(8E)-H(8E3) | 109.5     |
| C(1B)-C(1C)-H(1C1)  | 108.9     | H(8E2)-C(8E)-H(8E3) | 109.5     |
| C(1D)-C(1C)-H(1C1)  | 108.9     | O(8)-C(8)-N(9)      | 122.6(11) |
| C(1B)-C(1C)-H(1C2)  | 108.9     | O(8)-C(8)-C(8A)     | 119.5(9)  |
| C(1D)-C(1C)-H(1C2)  | 108.9     | N(9)-C(8)-C(8A)     | 117.8(9)  |
| H(1C1)-C(1C)-H(1C2) | 107.7     | C(8)-N(9)-C(9A)     | 120.1(8)  |
| C(1E)-C(1D)-C(1C)   | 113.5(11) | C(8)-N(9)-H(9)      | 119(8)    |
| C(1E)-C(1D)-H(1D1)  | 108.9     | C(9A)-N(9)-H(9)     | 117(8)    |
| C(1C)-C(1D)-H(1D1)  | 108.9     | N(9)-C(9A)-C(9B)    | 111.7(9)  |
| C(1E)-C(1D)-H(1D2)  | 108.9     | N(9)-C(9A)-C(9)     | 110.9(8)  |
| C(1C)-C(1D)-H(1D2)  | 108.9     | C(9B)-C(9A)-C(9)    | 111.0(9)  |
| H(1D1)-C(1D)-H(1D2) | 107.7     | N(9)-C(9A)-H(9A)    | 107.7     |
| C(1F)-C(1E)-C(1D)   | 112.3(10) | C(9B)-C(9A)-H(9A)   | 107.7     |
| C(1F)-C(1E)-H(1E1)  | 109.2     | C(9)-C(9A)-H(9A)    | 107.7     |
| C(1D)-C(1E)-H(1E1)  | 109.2     | O(9A)-C(9B)-C(9A)   | 110.1(9)  |
| C(1F)-C(1E)-H(1E2)  | 109.2     | O(9A)-C(9B)-H(9B1)  | 109.6     |
| C(1D)-C(1E)-H(1E2)  | 109.2     | C(9A)-C(9B)-H(9B1)  | 109.6     |
| H(1E1)-C(1E)-H(1E2) | 107.9     | O(9A)-C(9B)-H(9B2)  | 109.6     |
| C(1E)-C(1F)-C(1G)   | 113.2(9)  | C(9A)-C(9B)-H(9B2)  | 109.6     |
| C(1E)-C(1F)-H(1F1)  | 108.9     | H(9B1)-C(9B)-H(9B2) | 108.2     |
| C(1G)-C(1F)-H(1F1)  | 108.9     | C(9B)-O(9A)-H(9AO)  | 103(8)    |
| C(1E)-C(1F)-H(1F2)  | 108.9     | O(9)-C(9)-N(10)     | 123.5(10) |
| C(1G)-C(1F)-H(1F2)  | 108.9     | O(9)-C(9)-C(9A)     | 121.7(9)  |
| H(1F1)-C(1F)-H(1F2) | 107.7     | N(10)-C(9)-C(9A)    | 114.8(9)  |
| C(1H)-C(1G)-C(1F)   | 113.3(9)  | C(9)-N(10)-C(10A)   | 122.4(8)  |

|                     |           |                      |           |
|---------------------|-----------|----------------------|-----------|
| C(1H)-C(1G)-H(1G1)  | 108.9     | C(9)-N(10)-H(10)     | 119(9)    |
| C(1F)-C(1G)-H(1G1)  | 108.9     | C(10A)-N(10)-H(10)   | 119(9)    |
| C(1H)-C(1G)-H(1G2)  | 108.9     | N(10)-C(10A)-C(10)   | 111.2(8)  |
| C(1F)-C(1G)-H(1G2)  | 108.9     | N(10)-C(10A)-C(10B)  | 108.9(8)  |
| H(1G1)-C(1G)-H(1G2) | 107.7     | C(10)-C(10A)-C(10B)  | 114.6(10) |
| O(1A)-C(1H)-C(1G)   | 111.2(8)  | N(10)-C(10A)-H(10A)  | 107.3     |
| O(1A)-C(1H)-C(1I)   | 107.1(8)  | C(10)-C(10A)-H(10A)  | 107.3     |
| C(1G)-C(1H)-C(1I)   | 111.2(8)  | C(10B)-C(10A)-H(10A) | 107.3     |
| O(1A)-C(1H)-H(1H)   | 109.1     | C(10C)-C(10B)-C(10A) | 111.4(11) |
| C(1G)-C(1H)-H(1H)   | 109.1     | C(10C)-C(10B)-C(10D) | 111.2(13) |
| C(1I)-C(1H)-H(1H)   | 109.1     | C(10A)-C(10B)-C(10D) | 112.6(10) |
| C(1)-C(1D)-C(1H)    | 112.8(8)  | C(10C)-C(10B)-H(10B) | 107.1     |
| C(1)-C(1D)-H(1IA)   | 109       | C(10A)-C(10B)-H(10B) | 107.1     |
| C(1H)-C(1D)-H(1IA)  | 109       | C(10D)-C(10B)-H(10B) | 107.1     |
| C(1)-C(1D)-H(1IB)   | 109       | C(10B)-C(10C)-H(10C) | 108.8     |
| C(1H)-C(1D)-H(1IB)  | 109       | C(10B)-C(10C)-H(10D) | 109.9     |
| H(1IA)-C(1D)-H(1IB) | 107.8     | H(10C)-C(10C)-H(10D) | 109.5     |
| C(1H)-O(1A)-H(1AO)  | 112(8)    | C(10B)-C(10C)-H(10E) | 109.8     |
| O(1)-C(1)-N(2)      | 121.1(10) | H(10C)-C(10C)-H(10E) | 109.5     |
| O(1)-C(1)-C(1I)     | 122.9(9)  | H(10D)-C(10C)-H(10E) | 109.5     |
| N(2)-C(1)-C(1I)     | 116.1(9)  | C(10E)-C(10D)-C(10B) | 113.6(15) |
| C(1)-N(2)-C(2A)     | 119.4(9)  | C(10E)-C(10D)-H(10F) | 108.8     |
| C(1)-N(2)-H(2)      | 114(9)    | C(10B)-C(10D)-H(10F) | 108.8     |
| C(2A)-N(2)-H(2)     | 118(9)    | C(10E)-C(10D)-H(10G) | 108.8     |
| N(2)-C(2A)-C(2B)    | 110.7(9)  | C(10B)-C(10D)-H(10G) | 108.8     |
| N(2)-C(2A)-C(2)     | 110.3(9)  | H(10F)-C(10D)-H(10G) | 107.7     |
| C(2B)-C(2A)-C(2)    | 109.1(9)  | C(10D)-C(10E)-H(10H) | 109.7     |
| N(2)-C(2A)-H(2A)    | 108.9     | C(10D)-C(10E)-H(10I) | 108       |
| C(2B)-C(2A)-H(2A)   | 108.9     | H(10H)-C(10E)-H(10I) | 109.5     |
| C(2)-C(2A)-H(2A)    | 108.9     | C(10D)-C(10E)-H(10J) | 110.8     |
| C(2A)-C(2B)-C(2C)   | 113.2(9)  | H(10H)-C(10E)-H(10J) | 109.5     |
| C(2A)-C(2B)-H(2B1)  | 108.9     | H(10I)-C(10E)-H(10J) | 109.5     |
| C(2C)-C(2B)-H(2B1)  | 108.9     | C(10)-O(10A)-C(4B)   | 118.2(8)  |
| C(2A)-C(2B)-H(2B2)  | 108.9     | O(10)-C(10)-O(10A)   | 123.7(10) |
| C(2C)-C(2B)-H(2B2)  | 108.9     | O(10)-C(10)-C(10A)   | 122.9(10) |
| H(2B1)-C(2B)-H(2B2) | 107.7     | O(10A)-C(10)-C(10A)  | 113.4(9)  |
| C(2E)-C(2C)-C(2D)   | 110.4(11) | H(1SA)-O(1S)-H(1SB)  | 112(10)   |

---



**Table 4. Anisotropic displacement parameters ( $\text{\AA}^2 \times 10^3$ ) for viscosin (1). The anisotropic displacement factor exponent takes the form:  $-2 \pi^2 [h^2 a^{*2} U_{11} + \dots + 2hka^*b^* U_{12}]$**

|       | U11    | U22    | U33     | U23     | U13     | U12    |
|-------|--------|--------|---------|---------|---------|--------|
| C(1A) | 95(16) | 65(11) | 140(20) | -27(12) | -39(15) | 21(11) |
| C(1B) | 66(10) | 51(8)  | 69(9)   | -3(7)   | -7(8)   | 13(7)  |
| C(1C) | 97(13) | 46(8)  | 55(8)   | -9(6)   | 2(8)    | 5(8)   |
| C(1D) | 69(10) | 45(7)  | 42(7)   | -4(5)   | 2(6)    | 11(7)  |
| C(1E) | 60(8)  | 32(6)  | 36(6)   | -1(5)   | -7(5)   | 4(5)   |
| C(1F) | 34(6)  | 37(5)  | 34(5)   | -3(4)   | -1(5)   | 6(4)   |
| C(1G) | 34(6)  | 39(6)  | 29(5)   | -1(4)   | -2(4)   | -3(5)  |
| C(1H) | 17(5)  | 40(5)  | 30(5)   | 0(4)    | -5(4)   | -8(4)  |
| C(1I) | 18(5)  | 38(5)  | 31(5)   | -2(4)   | 1(4)    | -6(4)  |
| O(1A) | 19(3)  | 51(4)  | 27(3)   | 0(3)    | -4(3)   | 6(3)   |
| C(1)  | 17(5)  | 45(6)  | 25(5)   | -5(4)   | -5(4)   | 3(4)   |
| O(1)  | 21(3)  | 38(4)  | 27(3)   | -3(3)   | -1(3)   | -7(3)  |
| N(2)  | 23(4)  | 35(4)  | 34(4)   | 4(4)    | 4(4)    | 0(4)   |
| C(2A) | 17(5)  | 47(6)  | 31(5)   | -6(4)   | -6(4)   | -8(4)  |
| C(2B) | 22(5)  | 46(6)  | 36(5)   | -6(5)   | 5(4)    | 12(4)  |
| C(2C) | 31(6)  | 48(6)  | 41(6)   | -3(5)   | 1(5)    | 3(5)   |
| C(2D) | 41(7)  | 54(7)  | 57(8)   | -6(6)   | 17(6)   | 14(6)  |
| C(2E) | 48(8)  | 59(8)  | 55(8)   | 7(6)    | 9(6)    | 12(6)  |
| C(2)  | 10(4)  | 35(5)  | 33(5)   | 1(4)    | 1(4)    | -1(4)  |
| O(2)  | 22(3)  | 51(4)  | 21(3)   | -2(3)   | -4(3)   | -2(3)  |
| N(3)  | 18(4)  | 44(5)  | 21(4)   | -1(3)   | -6(3)   | 3(3)   |
| C(3A) | 16(5)  | 39(5)  | 31(5)   | 2(4)    | -1(4)   | -3(4)  |
| C(3B) | 22(5)  | 38(5)  | 30(5)   | -3(4)   | -8(4)   | -4(4)  |
| C(3C) | 27(5)  | 50(6)  | 28(5)   | 9(5)    | 3(4)    | 6(5)   |
| C(3D) | 22(5)  | 43(6)  | 37(6)   | 2(5)    | 6(4)    | 12(4)  |
| O(3A) | 45(5)  | 62(5)  | 38(4)   | 9(4)    | 6(4)    | 12(4)  |
| O(3B) | 78(7)  | 75(7)  | 34(4)   | 20(4)   | 16(5)   | 38(6)  |
| C(3)  | 16(5)  | 37(5)  | 23(4)   | 6(4)    | -4(4)   | -1(4)  |
| O(3)  | 15(3)  | 52(4)  | 30(4)   | 0(3)    | -2(3)   | 1(3)   |
| N(4)  | 14(4)  | 36(4)  | 27(4)   | 5(3)    | -3(3)   | 7(3)   |
| C(4A) | 9(4)   | 35(5)  | 29(5)   | 2(4)    | 6(3)    | -4(4)  |

|       |       |       |       |       |        |        |
|-------|-------|-------|-------|-------|--------|--------|
| C(4B) | 22(5) | 40(5) | 28(5) | 0(4)  | -4(4)  | 10(4)  |
| C(4C) | 36(6) | 42(6) | 45(6) | -4(5) | -10(5) | 14(5)  |
| C(4)  | 8(4)  | 36(5) | 41(5) | 1(4)  | 2(4)   | 0(4)   |
| O(4)  | 18(4) | 49(4) | 27(3) | 0(3)  | -2(3)  | 5(3)   |
| N(5)  | 10(4) | 44(5) | 23(4) | 2(3)  | -4(3)  | -4(3)  |
| C(5A) | 18(5) | 42(6) | 30(5) | 1(4)  | 3(4)   | -1(4)  |
| C(5B) | 16(5) | 60(7) | 34(5) | -2(5) | 9(4)   | 2(5)   |
| C(5C) | 24(5) | 62(7) | 38(6) | 6(5)  | 6(5)   | -10(5) |
| C(5D) | 34(7) | 80(9) | 38(6) | -3(6) | 8(5)   | -8(6)  |
| C(5)  | 15(5) | 51(6) | 27(5) | -1(4) | 11(4)  | 3(4)   |
| O(5)  | 27(4) | 51(4) | 27(4) | -6(3) | -4(3)  | -1(3)  |
| N(6)  | 18(4) | 42(5) | 26(4) | -8(4) | -5(3)  | 2(3)   |
| C(6A) | 16(5) | 35(5) | 26(5) | -2(4) | -1(4)  | -1(4)  |
| C(6B) | 24(5) | 46(6) | 35(5) | 0(5)  | -4(4)  | 1(5)   |
| C(6C) | 21(5) | 42(6) | 48(6) | -6(5) | -7(4)  | 8(4)   |
| C(6D) | 23(6) | 61(8) | 53(7) | -7(6) | -10(5) | 17(5)  |
| C(6E) | 31(6) | 57(7) | 57(7) | 3(6)  | -4(6)  | 5(6)   |
| C(6)  | 17(5) | 50(6) | 21(4) | -1(4) | -3(4)  | -7(4)  |
| O(6)  | 20(3) | 39(4) | 39(4) | -2(3) | -2(3)  | 0(3)   |
| N(7)  | 15(4) | 44(5) | 25(4) | -2(3) | -4(3)  | 2(3)   |
| C(7A) | 14(4) | 44(5) | 29(5) | 2(4)  | 1(4)   | 0(4)   |
| C(7B) | 28(6) | 49(6) | 38(6) | -1(5) | -2(5)  | 2(5)   |
| O(7A) | 18(3) | 50(4) | 32(4) | -5(3) | -6(3)  | 6(3)   |
| C(7)  | 20(5) | 49(6) | 30(5) | 4(4)  | -9(4)  | -10(4) |
| O(7)  | 16(4) | 61(5) | 55(5) | 9(4)  | 1(3)   | 2(4)   |
| N(8)  | 11(4) | 42(5) | 32(4) | 6(4)  | -3(3)  | 1(3)   |
| C(8A) | 8(4)  | 42(5) | 33(5) | 2(4)  | -4(4)  | 2(4)   |
| C(8B) | 28(5) | 42(6) | 31(5) | 5(4)  | 3(4)   | 4(4)   |
| C(8C) | 30(6) | 42(6) | 34(5) | 4(5)  | 2(4)   | 7(5)   |
| C(8D) | 39(7) | 66(8) | 36(6) | 13(5) | 1(5)   | 11(6)  |
| C(8E) | 33(6) | 56(7) | 42(6) | 4(5)  | 4(5)   | -2(5)  |
| C(8)  | 25(5) | 48(6) | 23(4) | 11(4) | 0(4)   | -4(5)  |
| O(8)  | 24(4) | 47(4) | 42(4) | 7(3)  | -8(3)  | -1(3)  |
| N(9)  | 8(4)  | 51(5) | 27(4) | 3(4)  | 0(3)   | 10(3)  |
| C(9A) | 14(5) | 48(6) | 30(5) | -2(4) | 0(4)   | 5(4)   |
| C(9B) | 36(6) | 41(6) | 35(5) | 12(5) | 11(5)  | 8(5)   |

|        |         |         |        |       |         |         |
|--------|---------|---------|--------|-------|---------|---------|
| O(9A)  | 48(5)   | 36(4)   | 33(4)  | 4(3)  | -1(4)   | 5(4)    |
| C(9)   | 16(5)   | 42(5)   | 31(5)  | 5(4)  | 2(4)    | 8(4)    |
| O(9)   | 25(4)   | 54(5)   | 30(4)  | -2(3) | 3(3)    | 9(3)    |
| N(10)  | 26(4)   | 42(5)   | 24(4)  | 2(3)  | -1(3)   | 6(4)    |
| C(10A) | 31(6)   | 33(5)   | 27(5)  | 1(4)  | -3(4)   | -5(4)   |
| C(10B) | 33(6)   | 55(7)   | 43(6)  | 4(5)  | -2(5)   | -13(6)  |
| C(10C) | 32(7)   | 123(14) | 41(7)  | 8(8)  | 8(6)    | -11(8)  |
| C(10D) | 60(10)  | 89(12)  | 64(9)  | 23(8) | -11(8)  | -50(9)  |
| C(10E) | 129(19) | 52(9)   | 94(13) | 14(9) | -48(13) | -39(10) |
| O(10A) | 19(3)   | 37(4)   | 30(3)  | 1(3)  | -4(3)   | 8(3)    |
| C(10)  | 30(6)   | 36(5)   | 34(5)  | 0(4)  | -3(4)   | -5(4)   |
| O(10)  | 30(4)   | 45(5)   | 74(6)  | -7(4) | -15(4)  | -3(4)   |
| O(1S)  | 21(4)   | 48(5)   | 56(5)  | 14(4) | 12(3)   | 10(3)   |

---

**Table 5. Hydrogen coordinates and isotropic displacement parameters for viscosin (1).**

|        | x         | y         | z        | U(eq) |
|--------|-----------|-----------|----------|-------|
| H(1A1) | 0.7134    | 0.2867    | 0.4831   | 0.152 |
| H(1A2) | 0.7249    | 0.2036    | 0.4782   | 0.152 |
| H(1A3) | 0.7351    | 0.2409    | 0.5355   | 0.152 |
| H(1B1) | 0.5867    | 0.1838    | 0.5255   | 0.074 |
| H(1B2) | 0.5656    | 0.2335    | 0.4737   | 0.074 |
| H(1C1) | 0.5868    | 0.2885    | 0.582    | 0.079 |
| H(1C2) | 0.4863    | 0.271     | 0.5553   | 0.079 |
| H(1D1) | 0.613     | 0.3766    | 0.5119   | 0.063 |
| H(1D2) | 0.5097    | 0.3608    | 0.4883   | 0.063 |
| H(1E1) | 0.4403    | 0.4059    | 0.5692   | 0.052 |
| H(1E2) | 0.5424    | 0.4175    | 0.5959   | 0.052 |
| H(1F1) | 0.4687    | 0.4947    | 0.5045   | 0.042 |
| H(1F2) | 0.5759    | 0.5023    | 0.5243   | 0.042 |
| H(1G1) | 0.4154    | 0.5415    | 0.5893   | 0.041 |
| H(1G2) | 0.5221    | 0.5475    | 0.6103   | 0.041 |
| H(1H)  | 0.5519    | 0.6326    | 0.5379   | 0.035 |
| H(1IA) | 0.4044    | 0.6777    | 0.6118   | 0.035 |
| H(1IB) | 0.513     | 0.6729    | 0.6298   | 0.035 |
| H(1AO) | 0.441(9)  | 0.624(7)  | 0.475(3) | 0.039 |
| H(2)   | 0.428(10) | 0.801(7)  | 0.638(2) | 0.037 |
| H(2A)  | 0.427     | 0.8859    | 0.5453   | 0.038 |
| H(2B1) | 0.4023    | 0.9292    | 0.6571   | 0.042 |
| H(2B2) | 0.317     | 0.9147    | 0.6155   | 0.042 |
| H(2C)  | 0.4548    | 1.0265    | 0.6005   | 0.048 |
| H(2D1) | 0.354     | 1.0489    | 0.676    | 0.076 |
| H(2D2) | 0.2661    | 1.0456    | 0.6369   | 0.076 |
| H(2D3) | 0.3401    | 1.1074    | 0.6306   | 0.076 |
| H(2E1) | 0.3563    | 1.0723    | 0.5311   | 0.081 |
| H(2E2) | 0.287     | 1.0077    | 0.5389   | 0.081 |
| H(2E3) | 0.3888    | 0.9948    | 0.5156   | 0.081 |
| H(3)   | 0.578(9)  | 0.919(6)  | 0.511(2) | 0.033 |
| H(3A)  | 0.6911    | 0.9987    | 0.5703   | 0.034 |
| H(3B1) | 0.7885    | 0.9907    | 0.4906   | 0.036 |
| H(3B2) | 0.715     | 0.9356    | 0.4641   | 0.036 |
| H(3C1) | 0.596     | 1.0296    | 0.4723   | 0.042 |
| H(3C2) | 0.6809    | 1.0831    | 0.4864   | 0.042 |
| H(3BO) | 0.648(13) | 1.116(10) | 0.348(3) | 0.075 |
| H(4)   | 0.677(5)  | 0.815(6)  | 0.552(5) | 0.031 |
| H(4A)  | 0.8592    | 0.7836    | 0.5721   | 0.029 |

|        |          |          |          |       |
|--------|----------|----------|----------|-------|
| H(4B)  | 0.6943   | 0.694    | 0.5764   | 0.036 |
| H(4C1) | 0.7378   | 0.7261   | 0.4868   | 0.062 |
| H(4C2) | 0.7589   | 0.6446   | 0.4952   | 0.062 |
| H(4C3) | 0.8418   | 0.7002   | 0.4965   | 0.062 |
| H(5)   | 0.674(7) | 0.808(6) | 0.651(4) | 0.031 |
| H(5A)  | 0.7478   | 0.7629   | 0.7513   | 0.037 |
| H(5B)  | 0.5777   | 0.844    | 0.735    | 0.044 |
| H(5C1) | 0.5954   | 0.7013   | 0.7738   | 0.062 |
| H(5C2) | 0.5687   | 0.7206   | 0.7132   | 0.062 |
| H(5C3) | 0.4997   | 0.7402   | 0.7612   | 0.062 |
| H(5D1) | 0.6487   | 0.7992   | 0.8389   | 0.076 |
| H(5D2) | 0.5512   | 0.837    | 0.8296   | 0.076 |
| H(5D3) | 0.6454   | 0.879    | 0.8193   | 0.076 |
| H(6)   | 0.725(8) | 0.923(7) | 0.686(3) | 0.034 |
| H(6A)  | 0.786    | 1.0094   | 0.7685   | 0.031 |
| H(6B1) | 0.775    | 1.0444   | 0.6549   | 0.042 |
| H(6B2) | 0.7921   | 1.1012   | 0.7029   | 0.042 |
| H(6C)  | 0.6193   | 1.0229   | 0.6845   | 0.044 |
| H(6D1) | 0.5553   | 1.1356   | 0.6648   | 0.069 |
| H(6D2) | 0.6417   | 1.1215   | 0.6261   | 0.069 |
| H(6D3) | 0.6527   | 1.1725   | 0.6767   | 0.069 |
| H(6E1) | 0.6542   | 1.1159   | 0.7743   | 0.073 |
| H(6E2) | 0.6317   | 1.034    | 0.7784   | 0.073 |
| H(6E3) | 0.5537   | 1.0875   | 0.7584   | 0.073 |
| H(7)   | 0.918(9) | 0.923(5) | 0.661(4) | 0.034 |
| H(7A)  | 1.0761   | 0.9922   | 0.6882   | 0.035 |
| H(7B1) | 1.0456   | 0.992    | 0.596    | 0.046 |
| H(7B2) | 1.1369   | 0.944    | 0.6075   | 0.046 |
| H(7AO) | 1.054(9) | 0.847(5) | 0.602(5) | 0.04  |
| H(8)   | 0.978(4) | 0.850(7) | 0.731(5) | 0.034 |
| H(8A)  | 1.1288   | 0.7936   | 0.7825   | 0.033 |
| H(8B1) | 0.9781   | 0.7878   | 0.822    | 0.041 |
| H(8B2) | 0.9401   | 0.7386   | 0.7733   | 0.041 |
| H(8C)  | 1.0429   | 0.6439   | 0.8048   | 0.043 |
| H(8D1) | 1.151    | 0.7179   | 0.855    | 0.07  |
| H(8D2) | 1.1129   | 0.6557   | 0.892    | 0.07  |
| H(8D3) | 1.0727   | 0.7333   | 0.8989   | 0.07  |
| H(8E1) | 0.9423   | 0.6169   | 0.882    | 0.065 |
| H(8E2) | 0.8834   | 0.6426   | 0.8313   | 0.065 |
| H(8E3) | 0.902    | 0.6949   | 0.8803   | 0.065 |
| H(9)   | 1.005(6) | 0.724(6) | 0.671(5) | 0.034 |
| H(9A)  | 1.1409   | 0.6226   | 0.6511   | 0.037 |
| H(9B1) | 1.1982   | 0.7231   | 0.6072   | 0.045 |

|        |           |          |          |       |
|--------|-----------|----------|----------|-------|
| H(9B2) | 1.1629    | 0.6685   | 0.5609   | 0.045 |
| H(9AO) | 1.062(10) | 0.735(7) | 0.533(3) | 0.047 |
| H(10)  | 0.964(10) | 0.586(7) | 0.680(2) | 0.037 |
| H(10A) | 0.8936    | 0.4999   | 0.6022   | 0.036 |
| H(10B) | 0.8833    | 0.4749   | 0.6964   | 0.052 |
| H(10C) | 0.7664    | 0.5275   | 0.75     | 0.099 |
| H(10D) | 0.7392    | 0.5796   | 0.7022   | 0.099 |
| H(10E) | 0.8386    | 0.5856   | 0.7302   | 0.099 |
| H(10F) | 0.7352    | 0.4183   | 0.6964   | 0.085 |
| H(10G) | 0.7002    | 0.4668   | 0.6464   | 0.085 |
| H(10H) | 0.7964    | 0.4078   | 0.5861   | 0.137 |
| H(10I) | 0.7489    | 0.348    | 0.6217   | 0.137 |
| H(10J) | 0.8539    | 0.3703   | 0.6329   | 0.137 |
| H(1SA) | 0.306(10) | 0.746(5) | 0.717(5) | 0.05  |
| H(1SB) | 0.292(8)  | 0.828(6) | 0.695(6) | 0.05  |

---

**Table 6. Torsion angles [°] for viscosin (1).**

|                         |            |
|-------------------------|------------|
| C(1A)-C(1B)-C(1C)-C(1D) | 68(2)      |
| C(1B)-C(1C)-C(1D)-C(1E) | -176.7(14) |
| C(1C)-C(1D)-C(1E)-C(1F) | 176.0(13)  |
| C(1D)-C(1E)-C(1F)-C(1G) | -172.9(11) |
| C(1E)-C(1F)-C(1G)-C(1H) | 178.4(10)  |
| C(1F)-C(1G)-C(1H)-O(1A) | 68.4(12)   |
| C(1F)-C(1G)-C(1H)-C(1I) | -172.3(9)  |
| O(1A)-C(1H)-C(1I)-C(1)  | -64.5(10)  |
| C(1G)-C(1H)-C(1I)-C(1)  | 173.9(9)   |
| C(1H)-C(1I)-C(1)-O(1)   | -29.0(13)  |
| C(1H)-C(1I)-C(1)-N(2)   | 152.1(9)   |
| O(1)-C(1)-N(2)-C(2A)    | 2.7(14)    |
| C(1I)-C(1)-N(2)-C(2A)   | -178.4(8)  |
| C(1)-N(2)-C(2A)-C(2B)   | 179.4(9)   |
| C(1)-N(2)-C(2A)-C(2)    | -59.7(12)  |
| N(2)-C(2A)-C(2B)-C(2C)  | -177.8(9)  |
| C(2)-C(2A)-C(2B)-C(2C)  | 60.7(12)   |
| C(2A)-C(2B)-C(2C)-C(2E) | 63.0(13)   |
| C(2A)-C(2B)-C(2C)-C(2D) | -172.8(10) |
| N(2)-C(2A)-C(2)-O(2)    | -59.9(12)  |
| C(2B)-C(2A)-C(2)-O(2)   | 61.9(13)   |
| N(2)-C(2A)-C(2)-N(3)    | 122.6(10)  |
| C(2B)-C(2A)-C(2)-N(3)   | -115.6(10) |
| O(2)-C(2)-N(3)-C(3A)    | 2.2(15)    |
| C(2A)-C(2)-N(3)-C(3A)   | 179.7(9)   |
| C(2)-N(3)-C(3A)-C(3B)   | 178.2(9)   |
| C(2)-N(3)-C(3A)-C(3)    | 55.1(12)   |
| N(3)-C(3A)-C(3B)-C(3C)  | 62.6(11)   |
| C(3)-C(3A)-C(3B)-C(3C)  | -173.5(9)  |
| C(3A)-C(3B)-C(3C)-C(3D) | -167.7(9)  |
| C(3B)-C(3C)-C(3D)-O(3A) | 6.0(17)    |
| C(3B)-C(3C)-C(3D)-O(3B) | -173.9(11) |
| N(3)-C(3A)-C(3)-O(3)    | -149.6(9)  |
| C(3B)-C(3A)-C(3)-O(3)   | 86.6(11)   |
| N(3)-C(3A)-C(3)-N(4)    | 30.0(12)   |
| C(3B)-C(3A)-C(3)-N(4)   | -93.7(10)  |
| O(3)-C(3)-N(4)-C(4A)    | 0.1(14)    |
| C(3A)-C(3)-N(4)-C(4A)   | -179.5(8)  |
| C(3)-N(4)-C(4A)-C(4)    | 64.5(11)   |
| C(3)-N(4)-C(4A)-C(4B)   | -171.9(8)  |
| N(4)-C(4A)-C(4B)-O(10A) | -173.7(7)  |

|                         |            |
|-------------------------|------------|
| C(4)-C(4A)-C(4B)-O(10A) | -49.5(10)  |
| N(4)-C(4A)-C(4B)-C(4C)  | 67.4(10)   |
| C(4)-C(4A)-C(4B)-C(4C)  | -168.4(8)  |
| N(4)-C(4A)-C(4)-O(4)    | -139.7(10) |
| C(4B)-C(4A)-C(4)-O(4)   | 97.2(11)   |
| N(4)-C(4A)-C(4)-N(5)    | 39.3(12)   |
| C(4B)-C(4A)-C(4)-N(5)   | -83.7(11)  |
| O(4)-C(4)-N(5)-C(5A)    | 6.5(15)    |
| C(4A)-C(4)-N(5)-C(5A)   | -172.5(9)  |
| C(4)-N(5)-C(5A)-C(5)    | 62.5(12)   |
| C(4)-N(5)-C(5A)-C(5B)   | -171.1(10) |
| N(5)-C(5A)-C(5B)-C(5C)  | 65.1(12)   |
| C(5)-C(5A)-C(5B)-C(5C)  | -170.9(9)  |
| N(5)-C(5A)-C(5B)-C(5D)  | -170.7(10) |
| C(5)-C(5A)-C(5B)-C(5D)  | -46.6(14)  |
| N(5)-C(5A)-C(5)-O(5)    | -132.4(9)  |
| C(5B)-C(5A)-C(5)-O(5)   | 102.4(11)  |
| N(5)-C(5A)-C(5)-N(6)    | 49.4(12)   |
| C(5B)-C(5A)-C(5)-N(6)   | -75.9(11)  |
| O(5)-C(5)-N(6)-C(6A)    | -4.2(14)   |
| C(5A)-C(5)-N(6)-C(6A)   | 174.0(8)   |
| C(5)-N(6)-C(6A)-C(6B)   | -174.7(9)  |
| C(5)-N(6)-C(6A)-C(6)    | 61.7(12)   |
| N(6)-C(6A)-C(6B)-C(6C)  | 58.4(12)   |
| C(6)-C(6A)-C(6B)-C(6C)  | -176.6(9)  |
| C(6A)-C(6B)-C(6C)-C(6E) | 52.8(14)   |
| C(6A)-C(6B)-C(6C)-C(6D) | 176.5(9)   |
| N(6)-C(6A)-C(6)-O(6)    | -148.2(9)  |
| C(6B)-C(6A)-C(6)-O(6)   | 88.4(11)   |
| N(6)-C(6A)-C(6)-N(7)    | 35.0(13)   |
| C(6B)-C(6A)-C(6)-N(7)   | -88.5(12)  |
| O(6)-C(6)-N(7)-C(7A)    | 1.2(16)    |
| C(6A)-C(6)-N(7)-C(7A)   | 177.9(9)   |
| C(6)-N(7)-C(7A)-C(7B)   | -139.7(10) |
| C(6)-N(7)-C(7A)-C(7)    | 95.3(12)   |
| N(7)-C(7A)-C(7B)-O(7A)  | -59.2(12)  |
| C(7)-C(7A)-C(7B)-O(7A)  | 66.9(11)   |
| N(7)-C(7A)-C(7)-O(7)    | -178.1(10) |
| C(7B)-C(7A)-C(7)-O(7)   | 56.1(13)   |
| N(7)-C(7A)-C(7)-N(8)    | 3.0(14)    |
| C(7B)-C(7A)-C(7)-N(8)   | -122.7(11) |
| O(7)-C(7)-N(8)-C(8A)    | 1.6(17)    |
| C(7A)-C(7)-N(8)-C(8A)   | -179.6(9)  |



|                             |            |
|-----------------------------|------------|
| C(7)-N(8)-C(8A)-C(8)        | -68.4(12)  |
| C(7)-N(8)-C(8A)-C(8B)       | 167.7(10)  |
| N(8)-C(8A)-C(8B)-C(8C)      | 178.6(9)   |
| C(8)-C(8A)-C(8B)-C(8C)      | 54.5(12)   |
| C(8A)-C(8B)-C(8C)-C(8D)     | 66.9(12)   |
| C(8A)-C(8B)-C(8C)-C(8E)     | -172.6(10) |
| N(8)-C(8A)-C(8)-O(8)        | 132.4(10)  |
| C(8B)-C(8A)-C(8)-O(8)       | -106.8(11) |
| N(8)-C(8A)-C(8)-N(9)        | -49.3(12)  |
| C(8B)-C(8A)-C(8)-N(9)       | 71.5(11)   |
| O(8)-C(8)-N(9)-C(9A)        | -13.2(15)  |
| C(8A)-C(8)-N(9)-C(9A)       | 168.6(9)   |
| C(8)-N(9)-C(9A)-C(9B)       | -83.7(12)  |
| C(8)-N(9)-C(9A)-C(9)        | 152.0(9)   |
| N(9)-C(9A)-C(9B)-O(9A)      | -55.7(12)  |
| C(9)-C(9A)-C(9B)-O(9A)      | 68.6(12)   |
| N(9)-C(9A)-C(9)-O(9)        | 140.7(10)  |
| C(9B)-C(9A)-C(9)-O(9)       | 15.9(14)   |
| N(9)-C(9A)-C(9)-N(10)       | -41.0(12)  |
| C(9B)-C(9A)-C(9)-N(10)      | -165.7(9)  |
| O(9)-C(9)-N(10)-C(10A)      | -5.9(16)   |
| C(9A)-C(9)-N(10)-C(10A)     | 175.8(9)   |
| C(9)-N(10)-C(10A)-C(10)     | -64.9(12)  |
| C(9)-N(10)-C(10A)-C(10B)    | 167.8(10)  |
| N(10)-C(10A)-C(10B)-C(10C)  | 66.2(13)   |
| C(10)-C(10A)-C(10B)-C(10C)  | -59.1(13)  |
| N(10)-C(10A)-C(10B)-C(10D)  | -168.1(12) |
| C(10)-C(10A)-C(10B)-C(10D)  | 66.6(15)   |
| C(10C)-C(10B)-C(10D)-C(10E) | -179.2(14) |
| C(10A)-C(10B)-C(10D)-C(10E) | 55.0(18)   |
| C(4C)-C(4B)-O(10A)-C(10)    | -71.4(12)  |
| C(4A)-C(4B)-O(10A)-C(10)    | 168.4(8)   |
| C(4B)-O(10A)-C(10)-O(10)    | -4.2(16)   |
| C(4B)-O(10A)-C(10)-C(10A)   | 177.5(8)   |
| N(10)-C(10A)-C(10)-O(10)    | 173.4(10)  |
| C(10B)-C(10A)-C(10)-O(10)   | -62.6(15)  |
| N(10)-C(10A)-C(10)-O(10A)   | -8.3(13)   |
| C(10B)-C(10A)-C(10)-O(10A)  | 115.7(11)  |

---

**Table 7. Hydrogen bonds for viscosin (1) [ $\text{\AA}$  and  $^\circ$ ].**

| D-H...A                | d(D-H)  | d(H...A) | d(D...A)  | $\angle(\text{DHA})$ |
|------------------------|---------|----------|-----------|----------------------|
| O(1A)-H(1AO)...O(7A)#1 | 0.99(6) | 1.89(7)  | 2.839(10) | 160(12)              |
| N(2)-H(2)...O(1S)      | 0.87(5) | 2.04(8)  | 2.814(12) | 149(13)              |
| N(3)-H(3)...O(9)#1     | 0.87(5) | 2.02(6)  | 2.856(11) | 162(12)              |
| O(3B)-H(3BO)...O(5)#2  | 0.99(6) | 1.62(6)  | 2.612(11) | 178(19)              |
| N(4)-H(4)...O(1)       | 0.86(5) | 2.08(5)  | 2.939(11) | 169(11)              |
| C(4C)-H(4C2)...O(10)   | 0.96    | 2.54     | 3.074(16) | 114.9                |
| N(5)-H(5)...O(2)       | 0.87(5) | 2.26(9)  | 2.971(11) | 140(10)              |
| N(6)-H(6)...O(2)       | 0.87(5) | 2.32(7)  | 3.117(10) | 152(11)              |
| C(6B)-H(6B2)...O(8)#3  | 0.99    | 2.42     | 3.280(14) | 144.8                |
| N(7)-H(7)...O(3)       | 0.87(5) | 2.08(9)  | 2.807(11) | 141(11)              |
| O(7A)-H(7AO)...O(9A)   | 0.99(6) | 1.94(11) | 2.677(11) | 129(10)              |
| N(8)-H(8)...O(4)       | 0.87(5) | 2.55(11) | 3.018(11) | 115(10)              |
| N(8)-H(8)...O(5)       | 0.87(5) | 2.43(8)  | 3.213(11) | 150(11)              |
| N(9)-H(9)...O(4)       | 0.87(5) | 2.09(6)  | 2.926(10) | 163(11)              |
| O(9A)-H(9AO)...O(1)#4  | 0.99(6) | 1.83(7)  | 2.791(10) | 163(12)              |
| N(10)-H(10)...O(6)#5   | 0.87(5) | 2.21(9)  | 2.909(11) | 138(11)              |
| O(1S)-H(1SA)...O(8)#6  | 0.99(6) | 1.93(9)  | 2.815(11) | 148(13)              |
| O(1S)-H(1SB)...O(7)#6  | 0.99(6) | 1.83(8)  | 2.772(11) | 157(13)              |

Symmetry transformations used to generate equivalent atoms:

#1  $x-1/2, -y+3/2, -z+1$  #2  $-x+3/2, -y+2, z-1/2$  #3  $-x+2, y+1/2, -z+3/2$

#4  $x+1/2, -y+3/2, -z+1$  #5  $-x+2, y-1/2, -z+3/2$  #6  $x-1, y, z$

**Figure 3.**  $^1\text{H}$  NMR spectrum of serrawettin W2 (2) in  $\text{DMSO-}d_6$  (600 MHz).

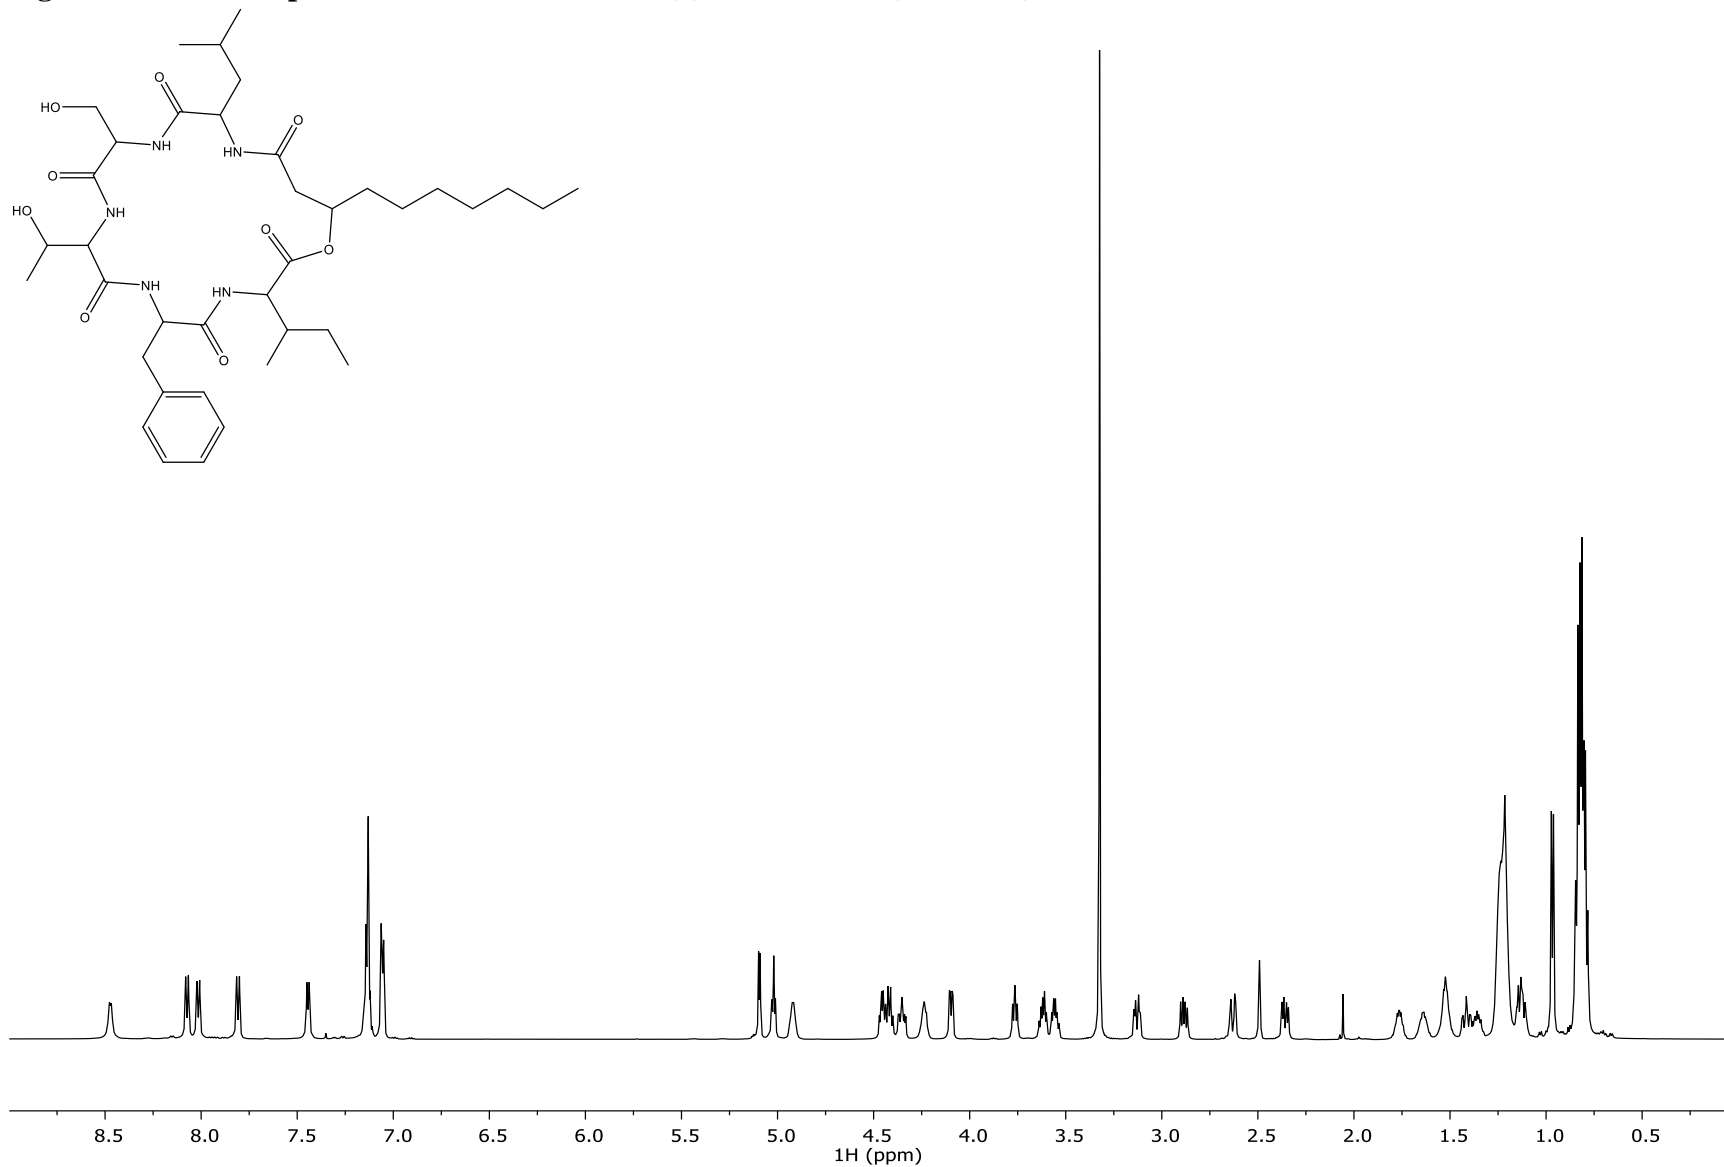

**Figure 4.**  $^{13}\text{C}$  NMR spectrum of serrawettin W2 (2) in  $\text{DMSO-}d_6$  (150 MHz).

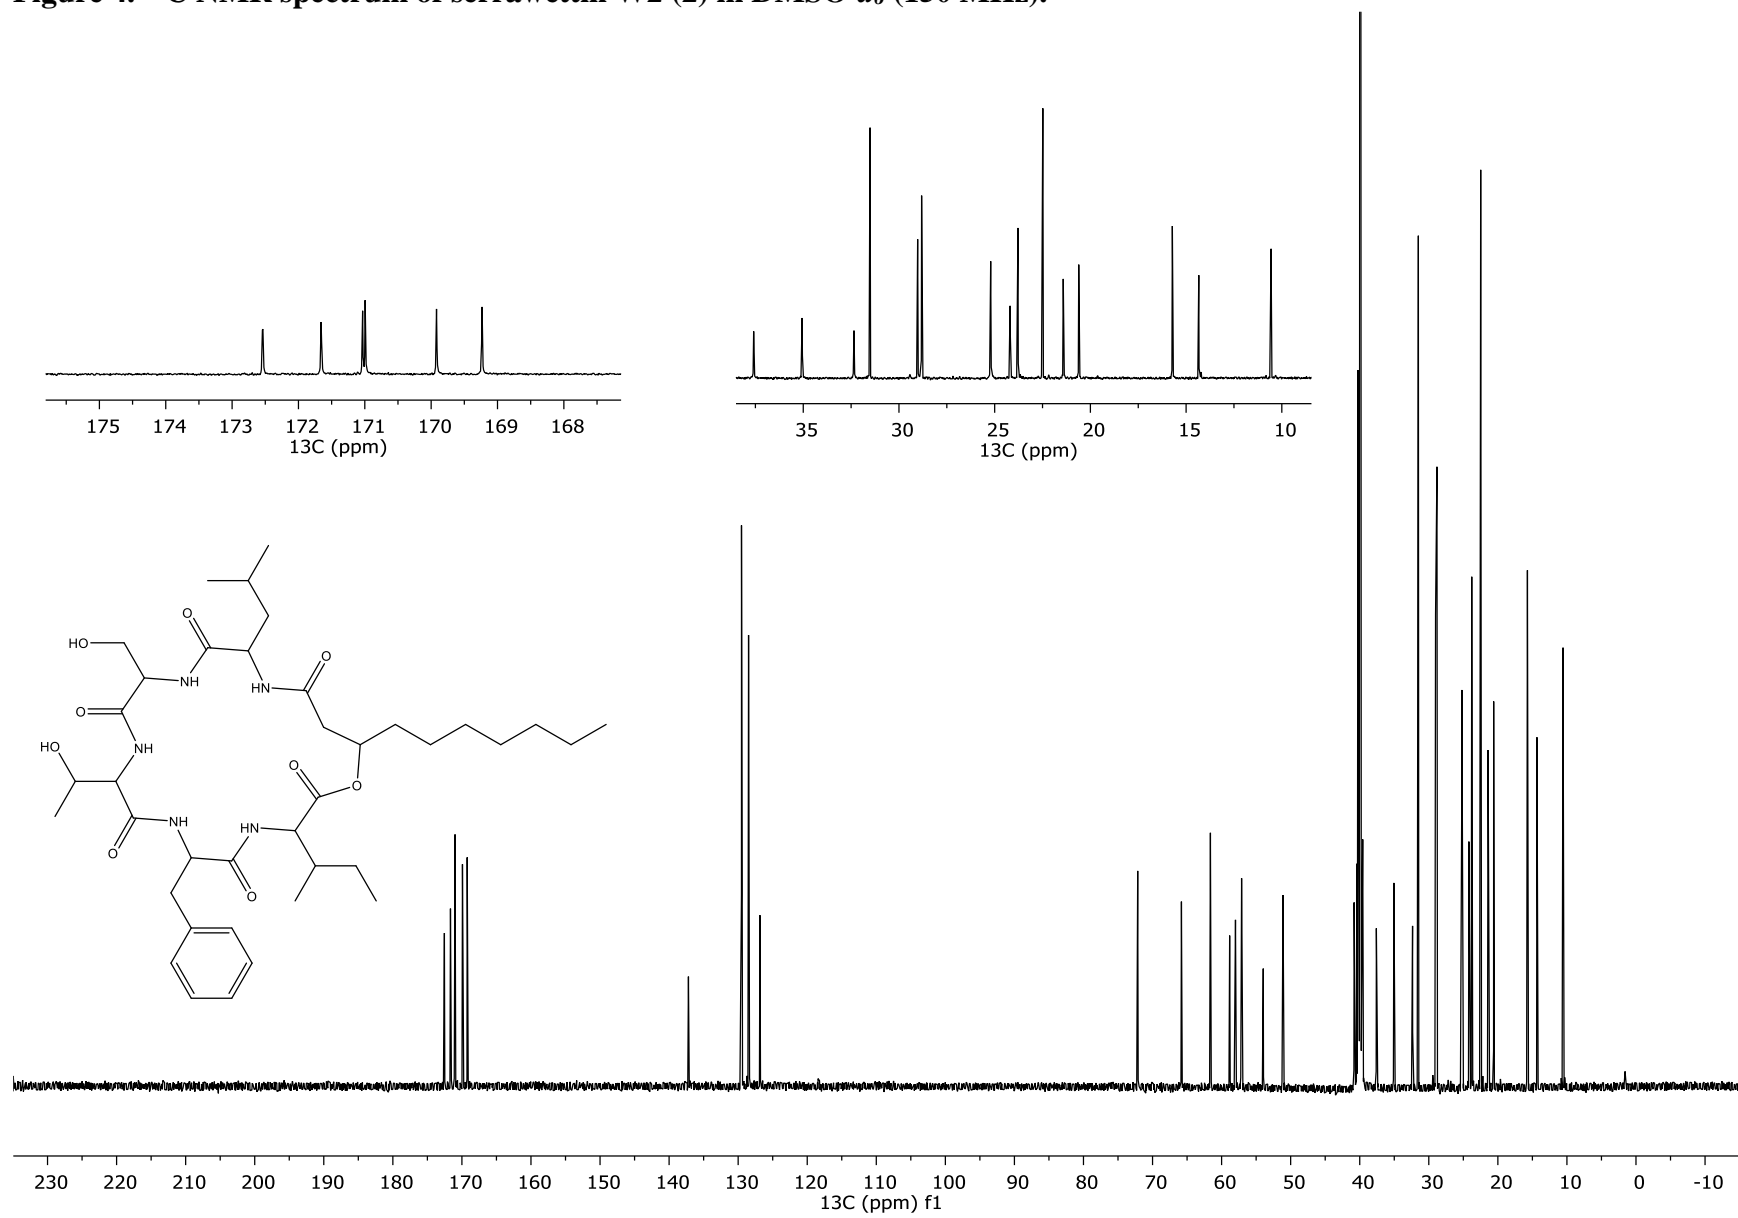

Figure 5.  $^1\text{H}$ - $^{13}\text{C}$  HSQCTOCSY spectrum of serrawettin W2 (2) in  $\text{DMSO-}d_6$ .

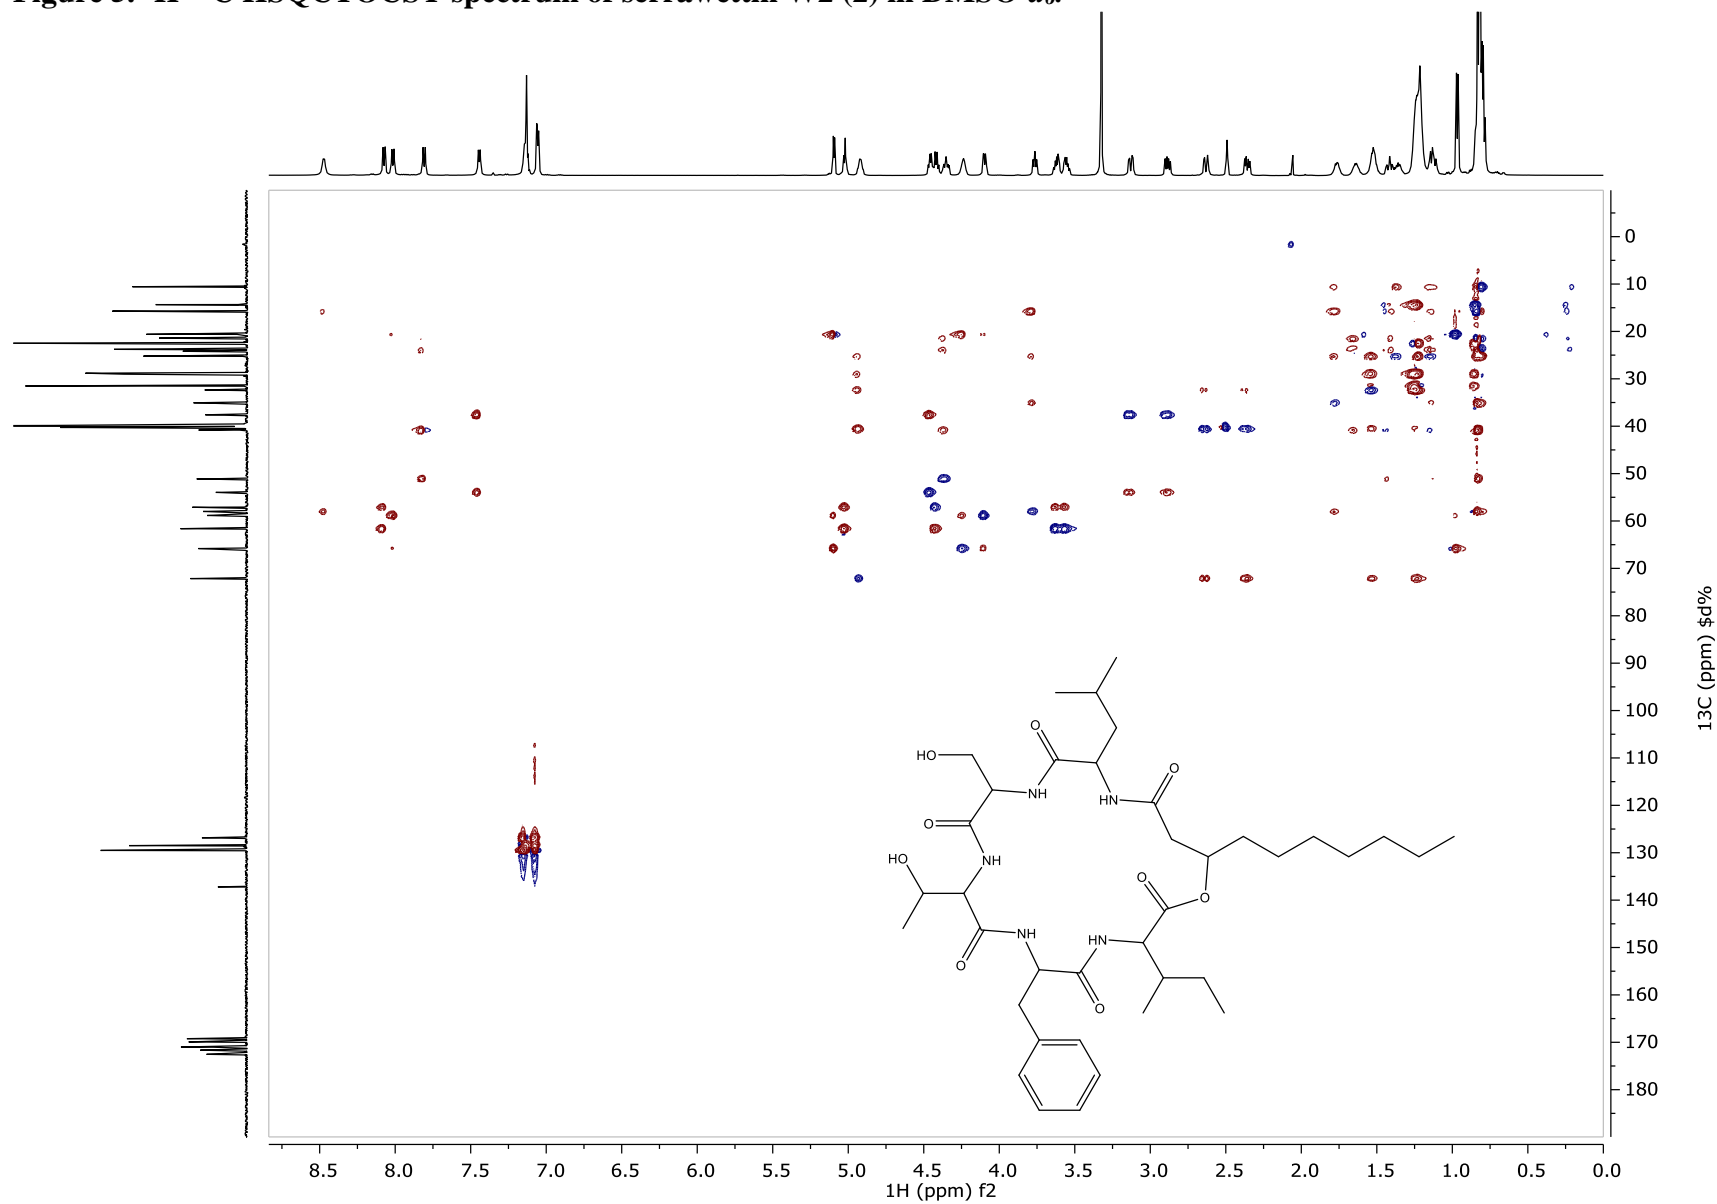

Figure 6.  $^1\text{H}$ - $^{15}\text{N}$  HSQC spectrum of serrawettin W2 (2) in  $\text{DMSO-}d_6$ .

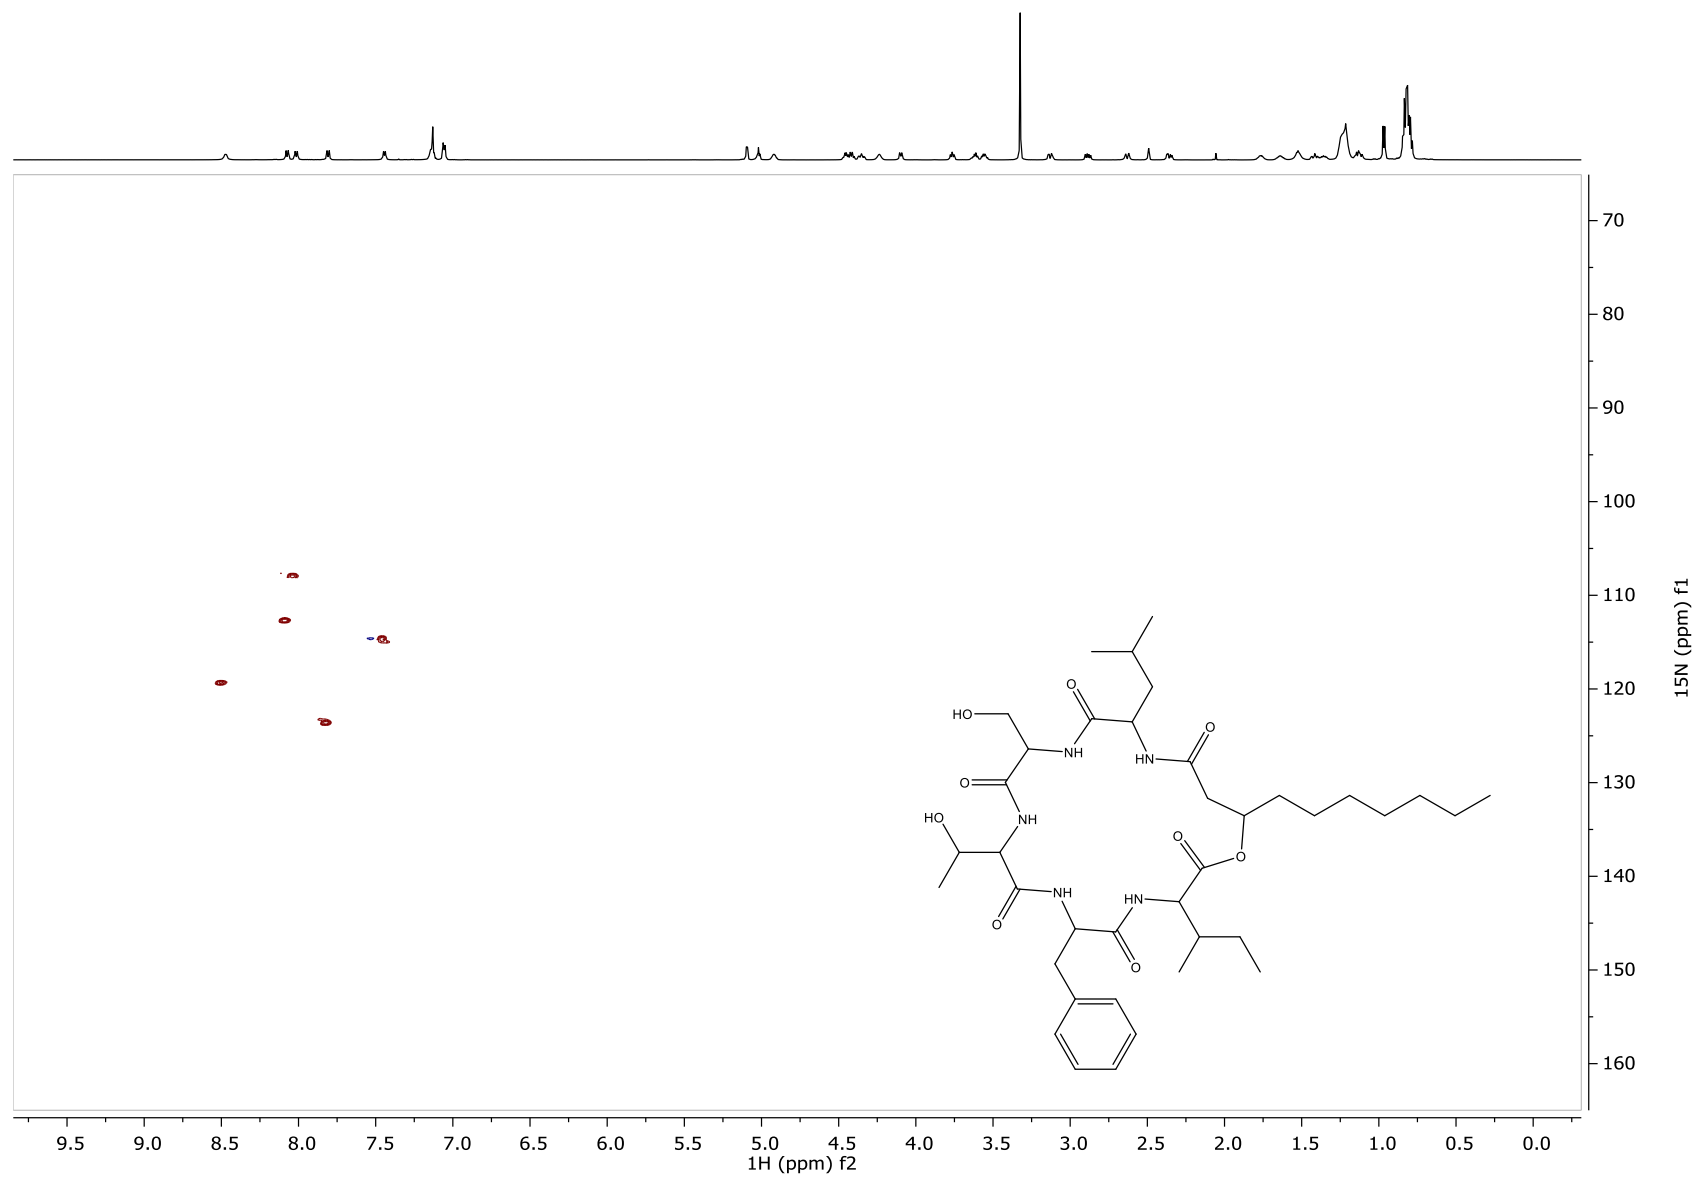

Figure 7.  $^1\text{H}$ - $^{13}\text{C}$  HSQC spectrum of serrawettin W2 (2) in  $\text{DMSO-}d_6$ .

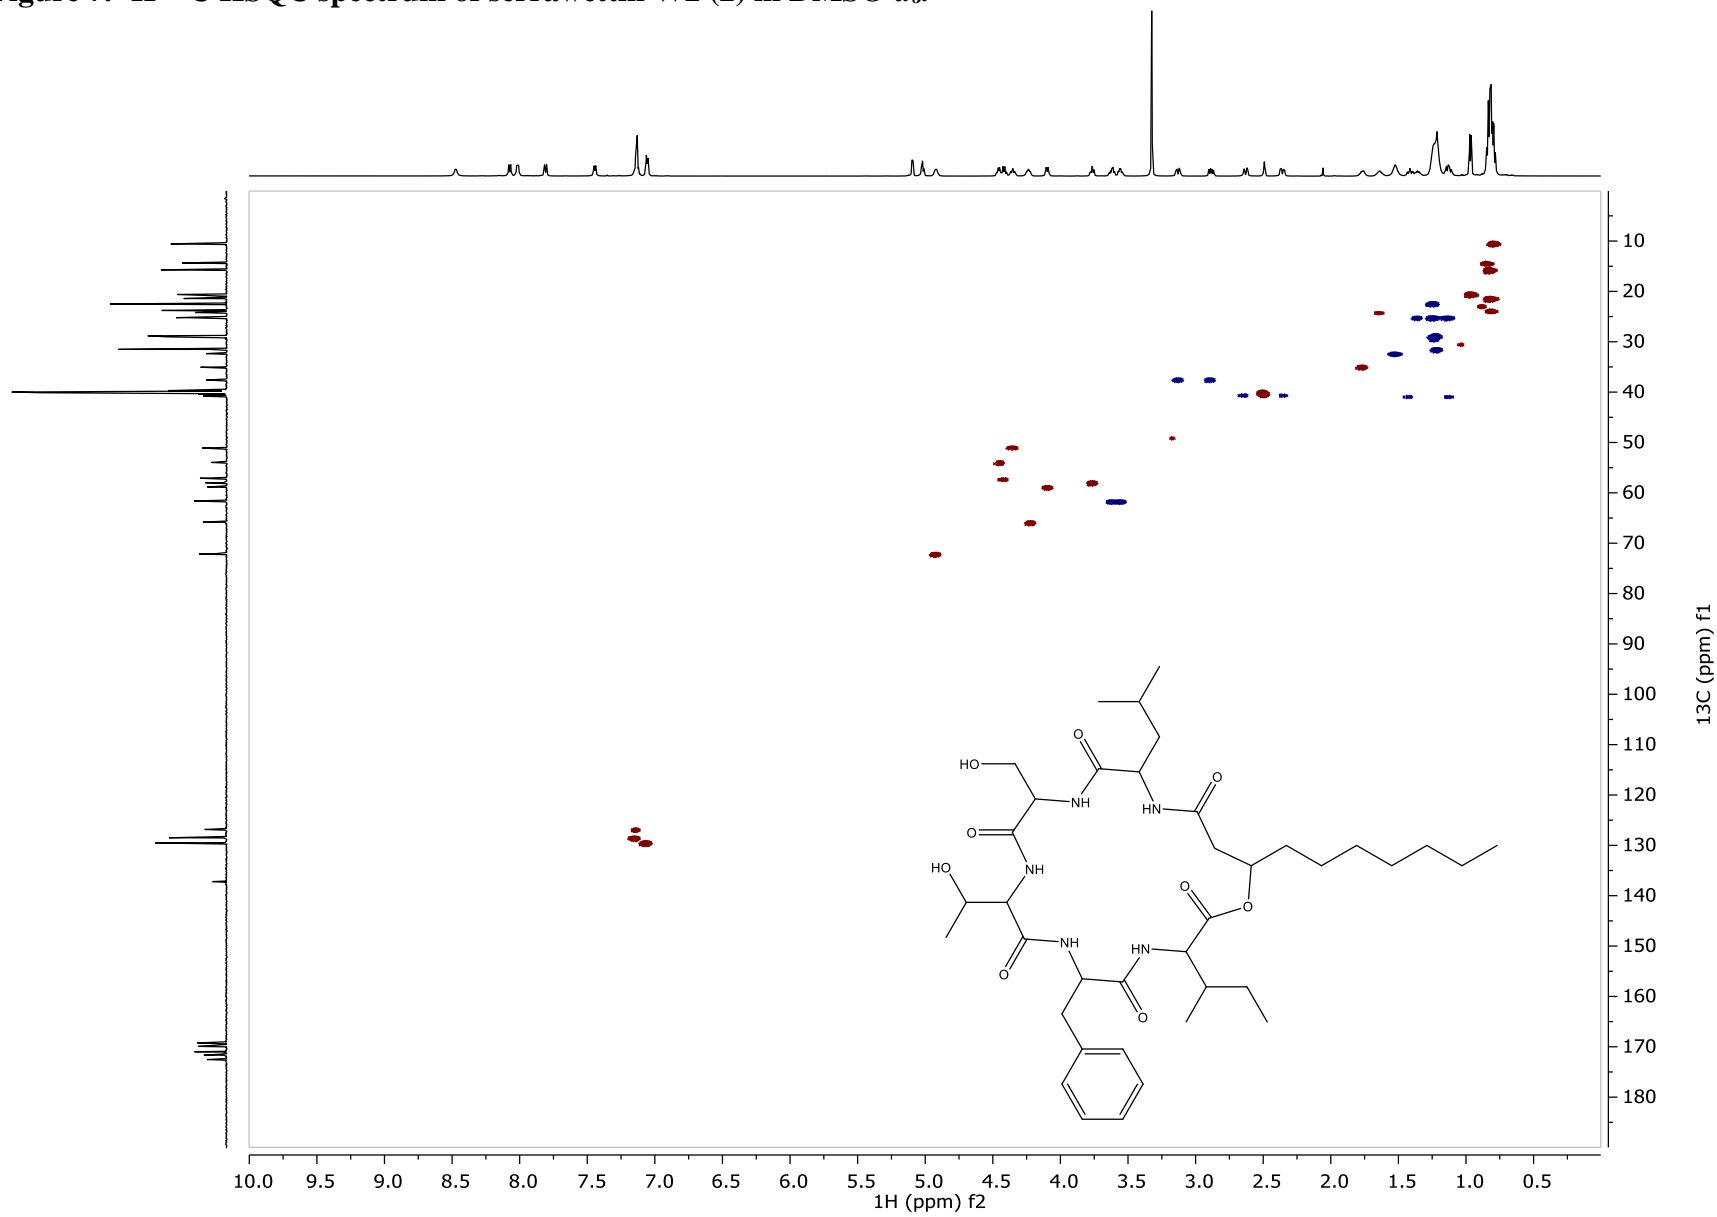





**Figure 9.**  $^1\text{H}$ - $^1\text{H}$  TOCSY spectrum of serrawettin W2 (2) in  $\text{DMSO-}d_6$ .

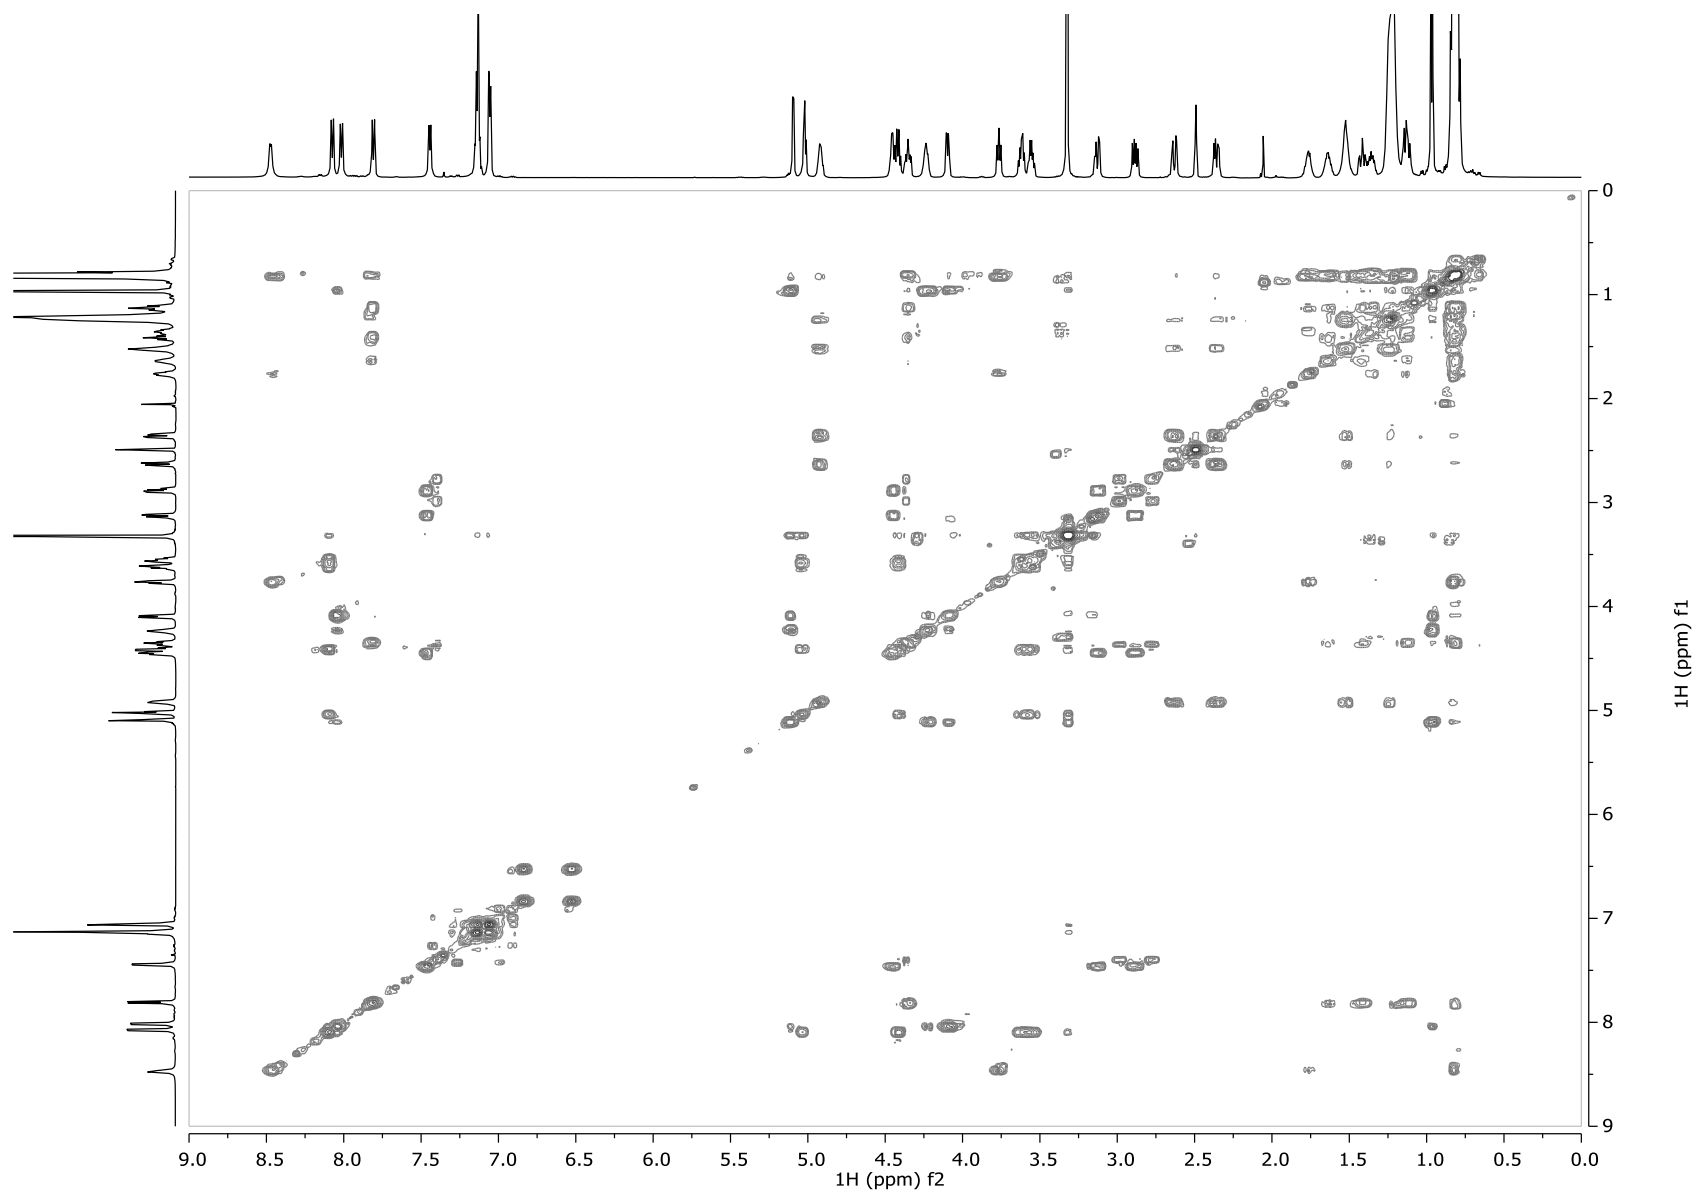

Figure 10.  $^1\text{H}$ - $^{13}\text{C}$  HMBC spectrum of serrawettin W2 (2) in  $\text{DMSO-}d_6$ .

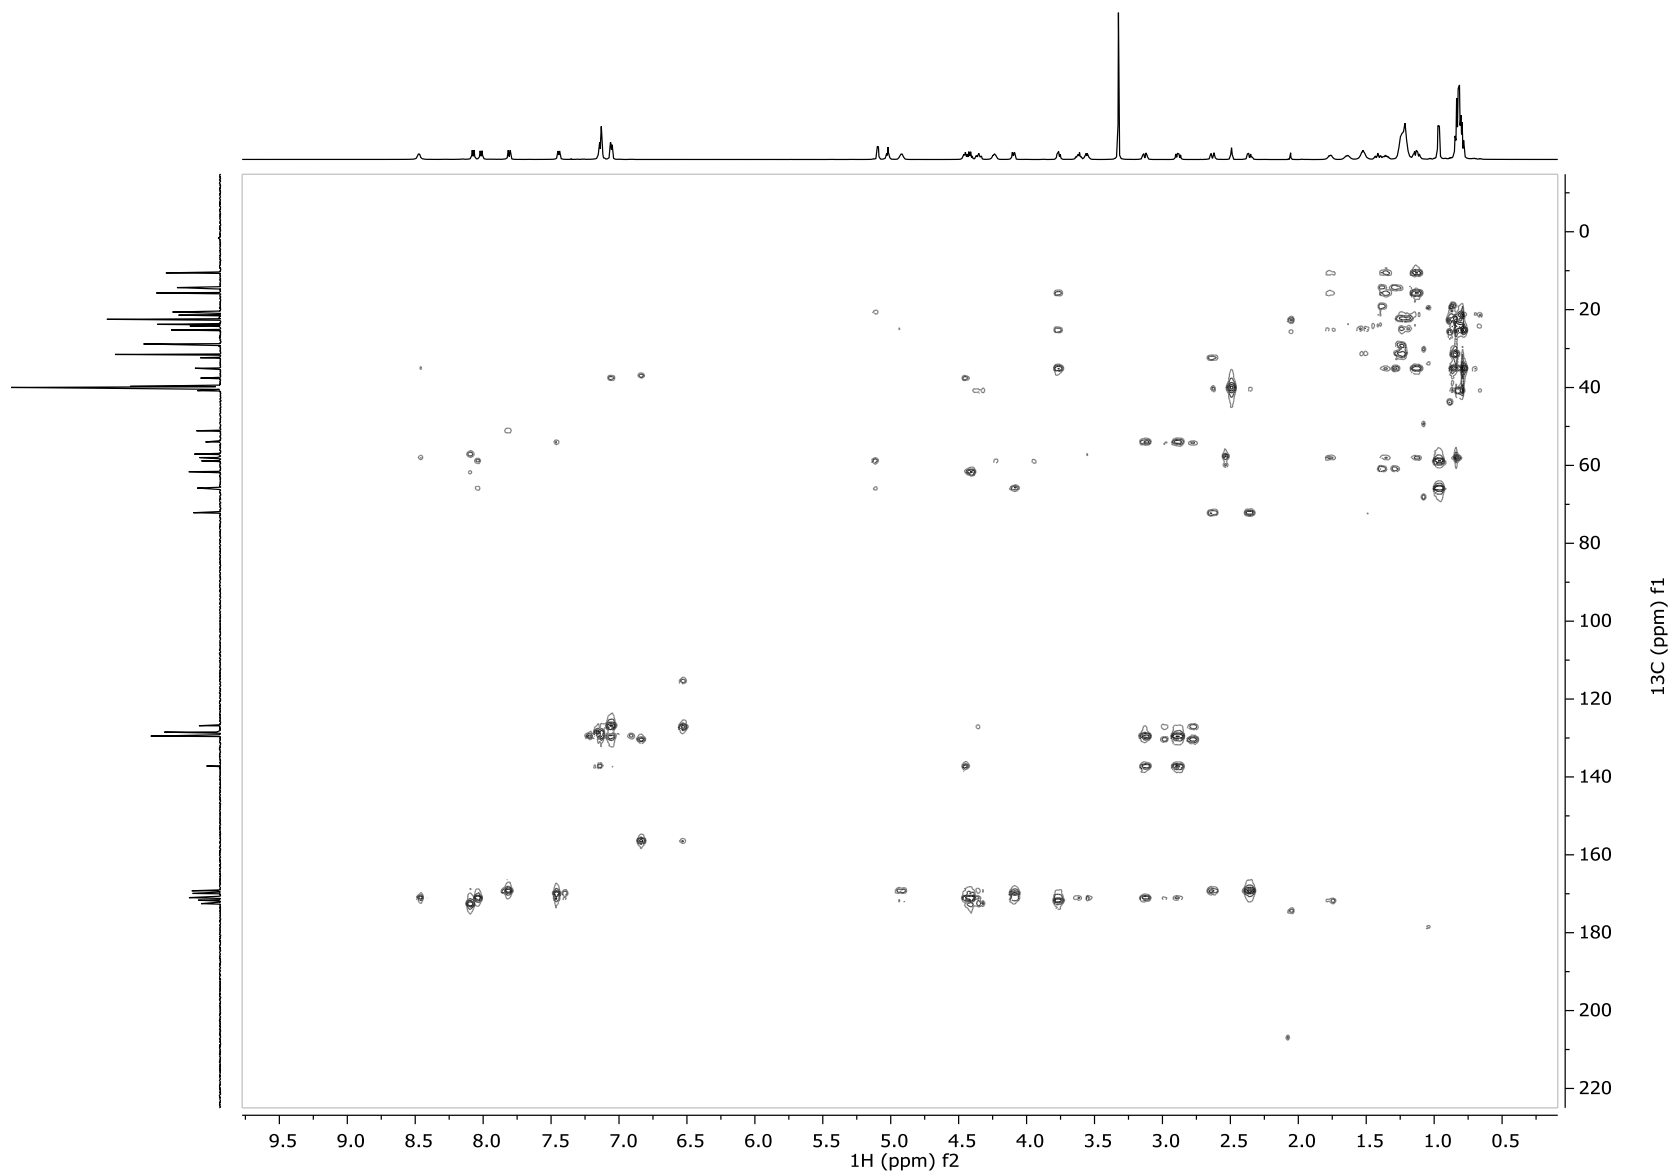

Figure 11.  $^1\text{H}$  NMR spectrum of serrawettin W4 (3) in  $\text{DMSO-}d_6$  (600 MHz).

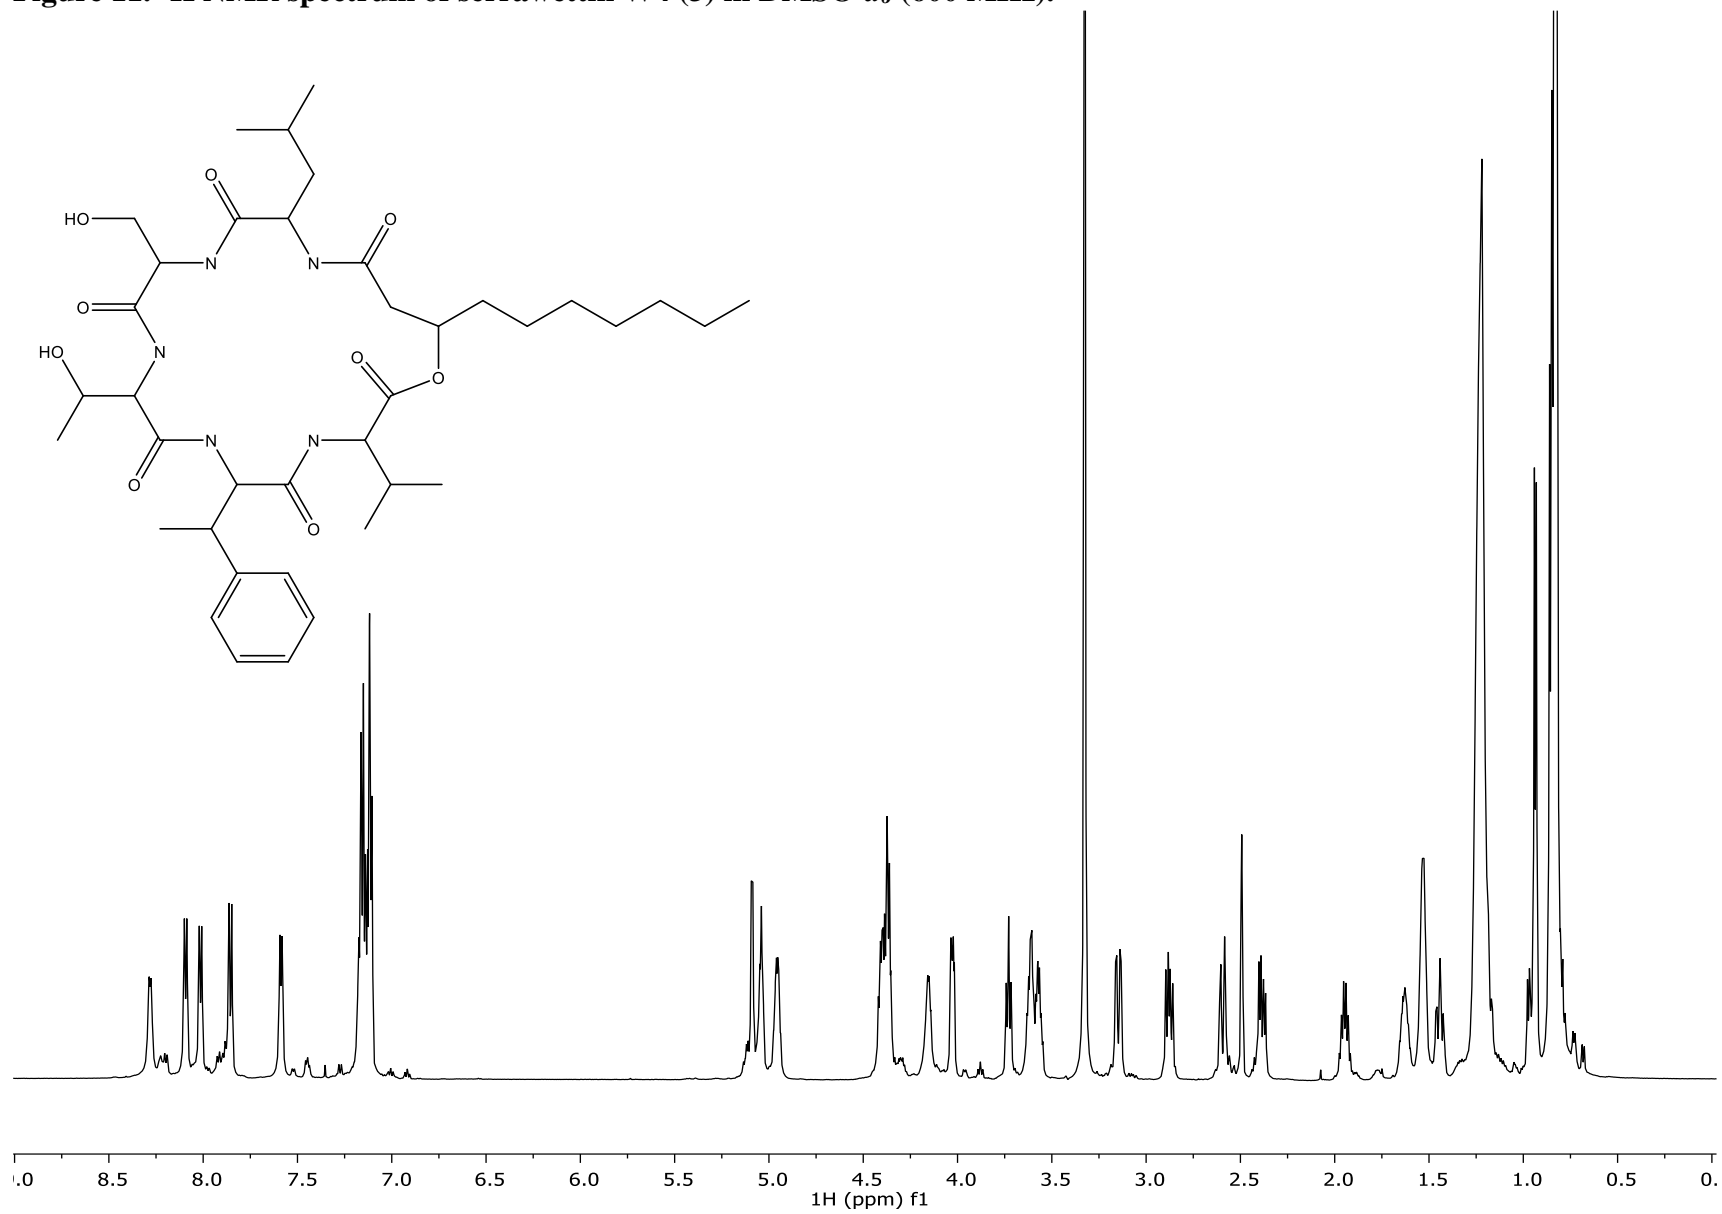

Figure 12.  $^{13}\text{C}$  NMR spectrum of serrawettin W4 (3) in  $\text{DMSO-}d_6$  (150 MHz).

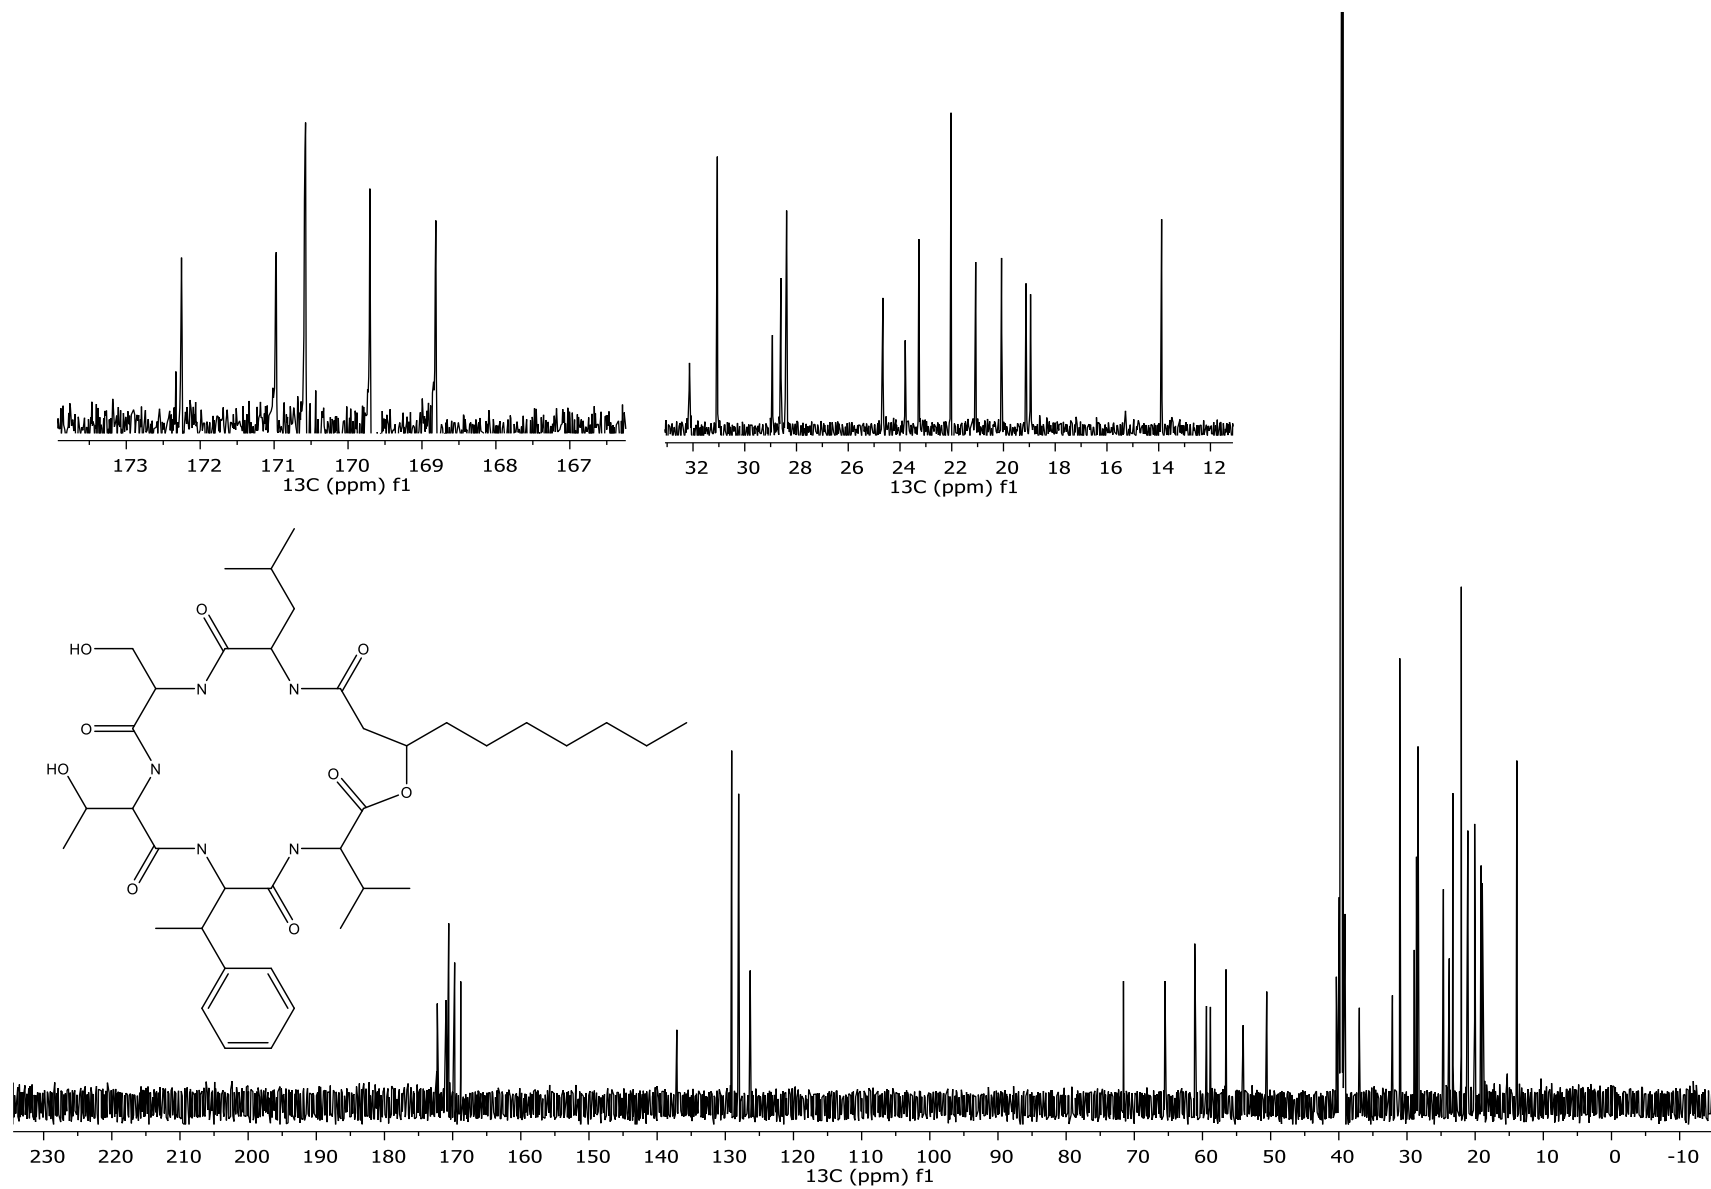

Figure 13.  $^1\text{H}$ - $^{13}\text{C}$  HSQC spectrum of serrawettin W4 (3) in  $\text{DMSO-}d_6$ .

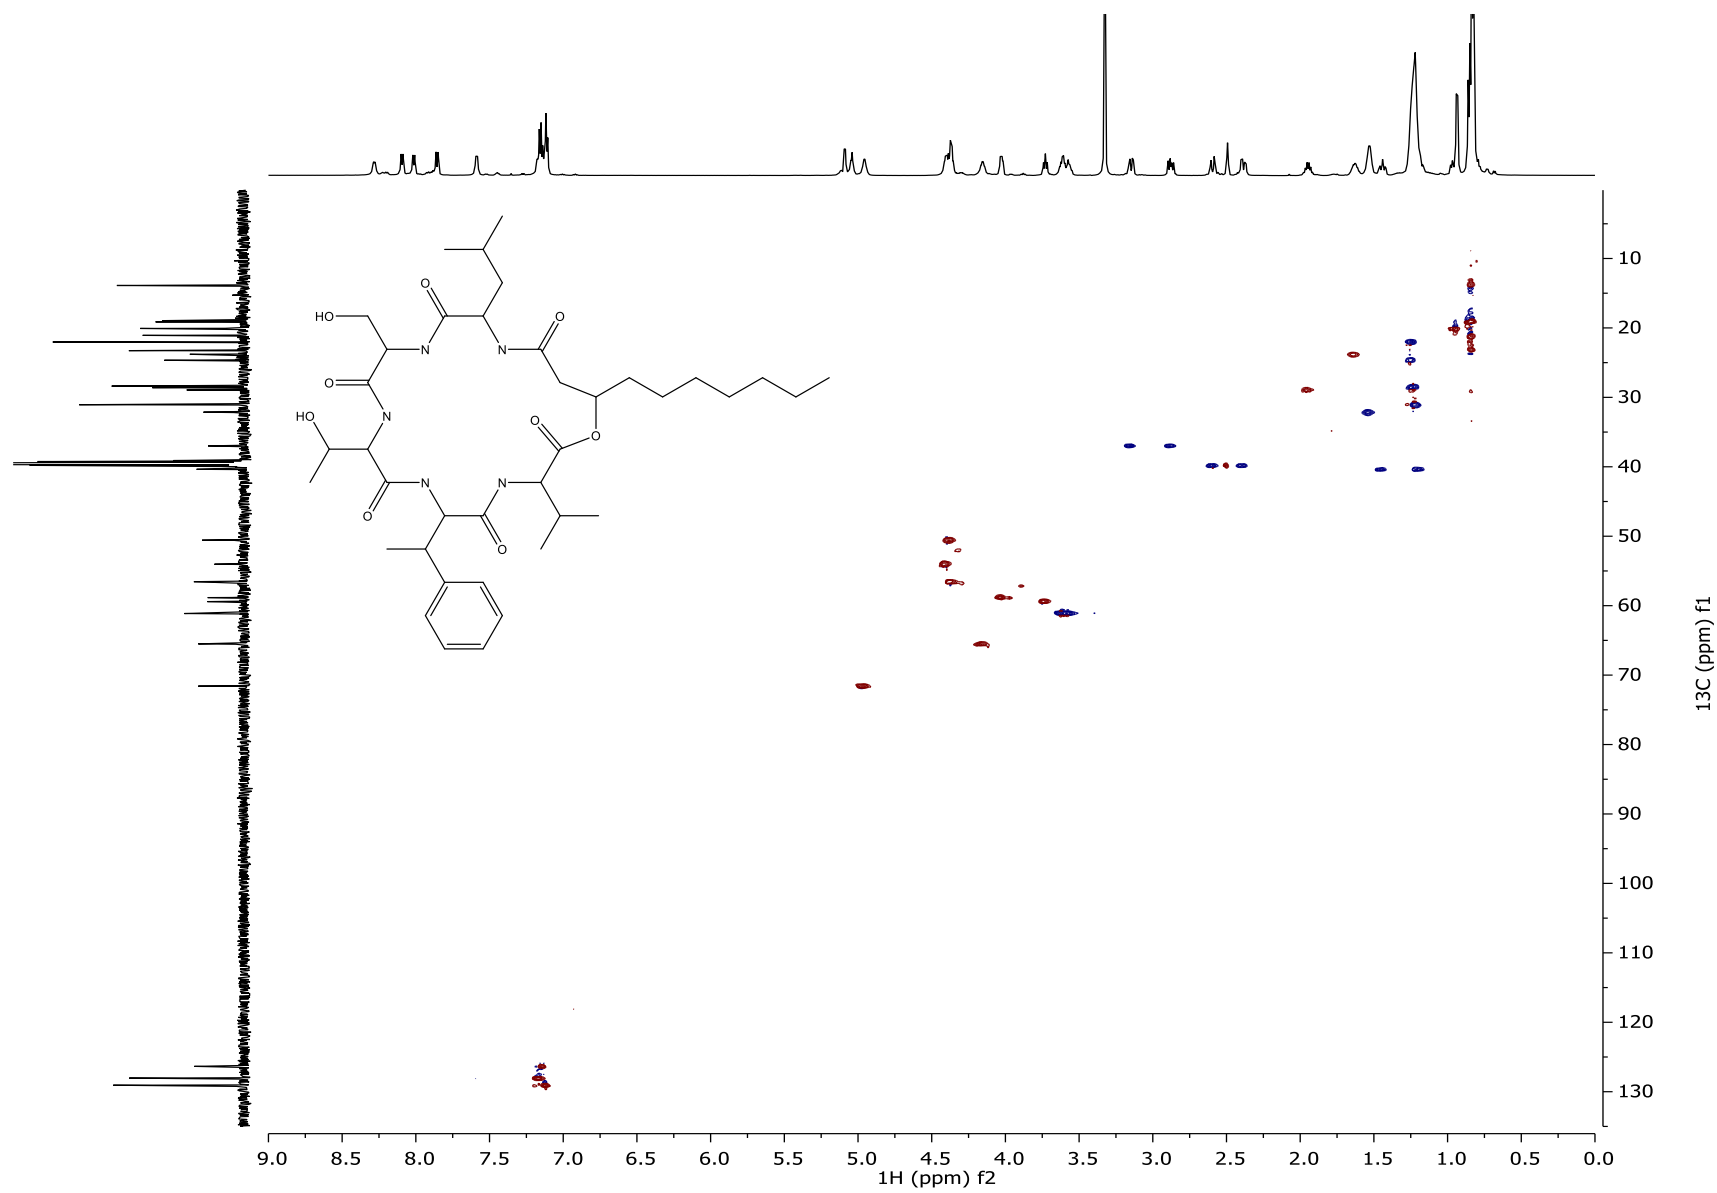



Figure 15.  $^1\text{H}$  TOCSY spectrum of serrawettin W4 (3) in  $\text{DMSO-}d_6$ .

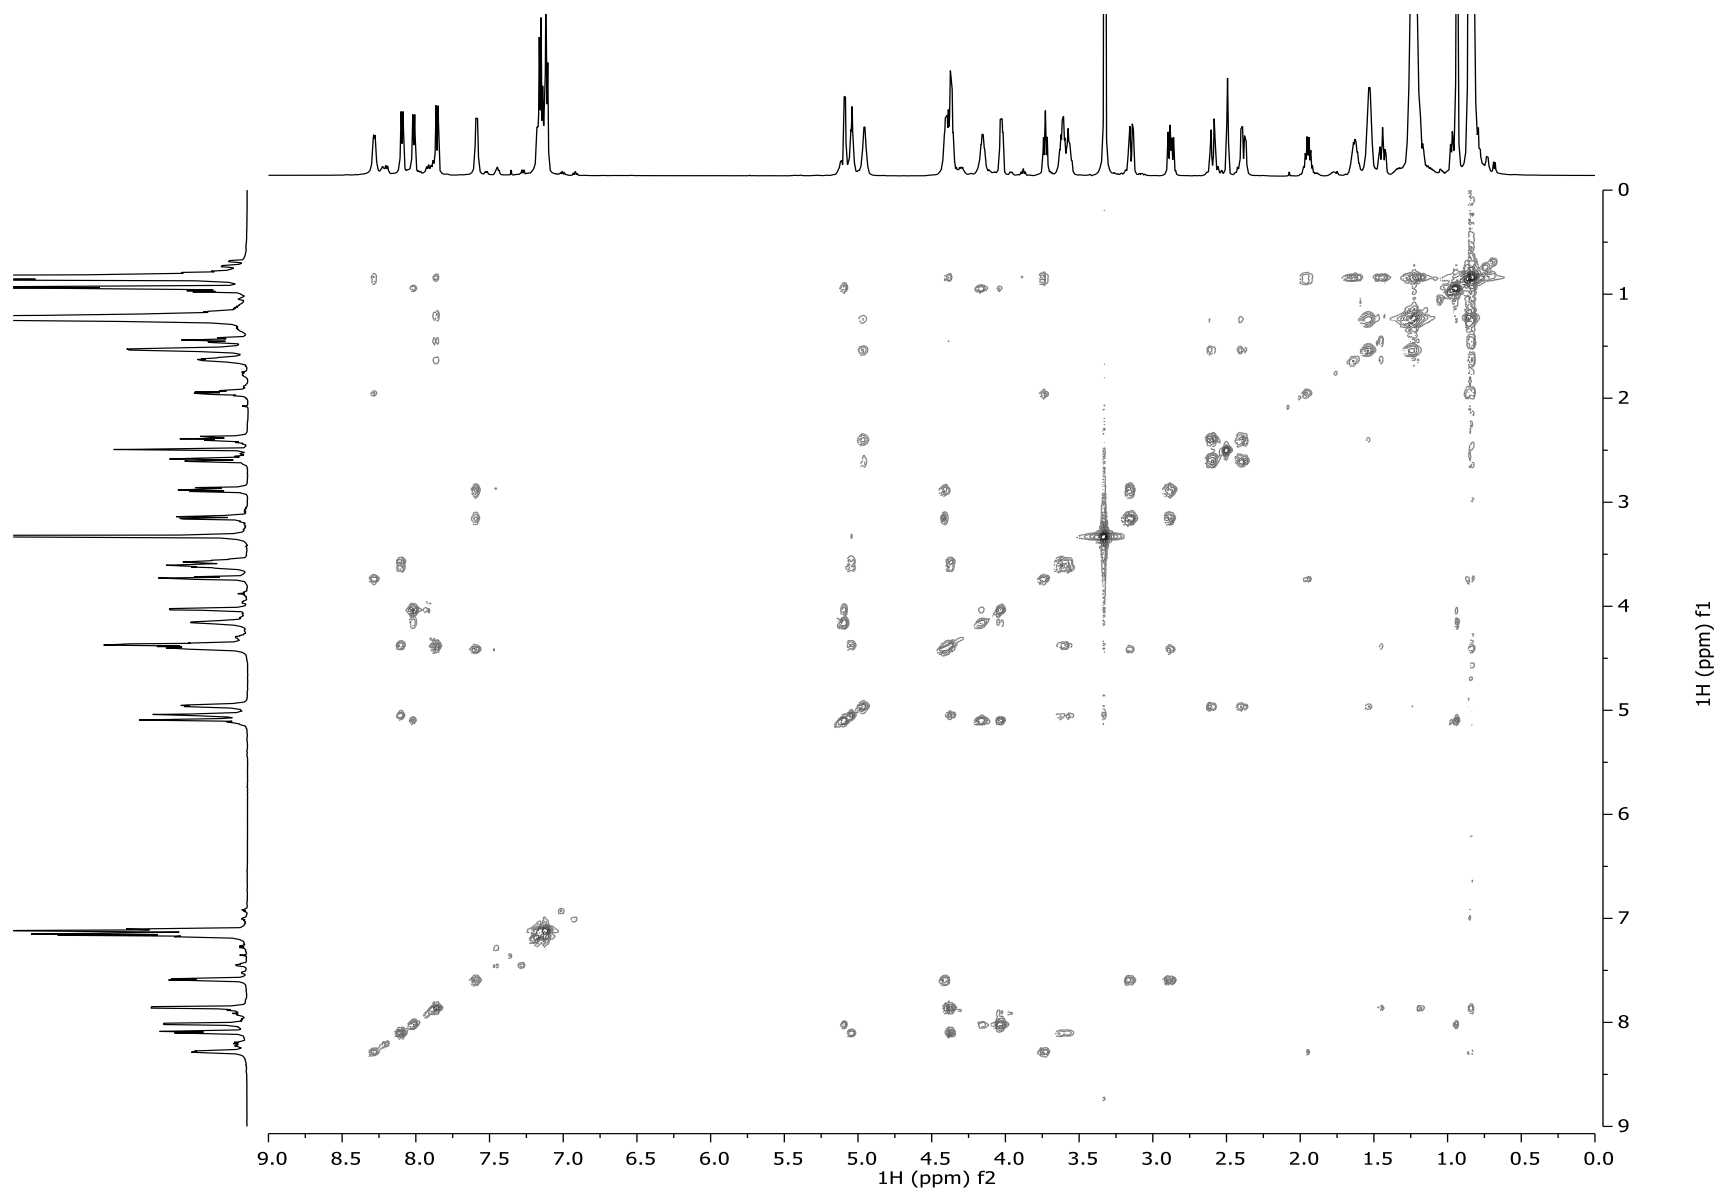

Figure 16.  $^1\text{H}$ - $^{13}\text{C}$  HMBC spectrum of serrawettin W4 (3) in  $\text{DMSO-}d_6$ .

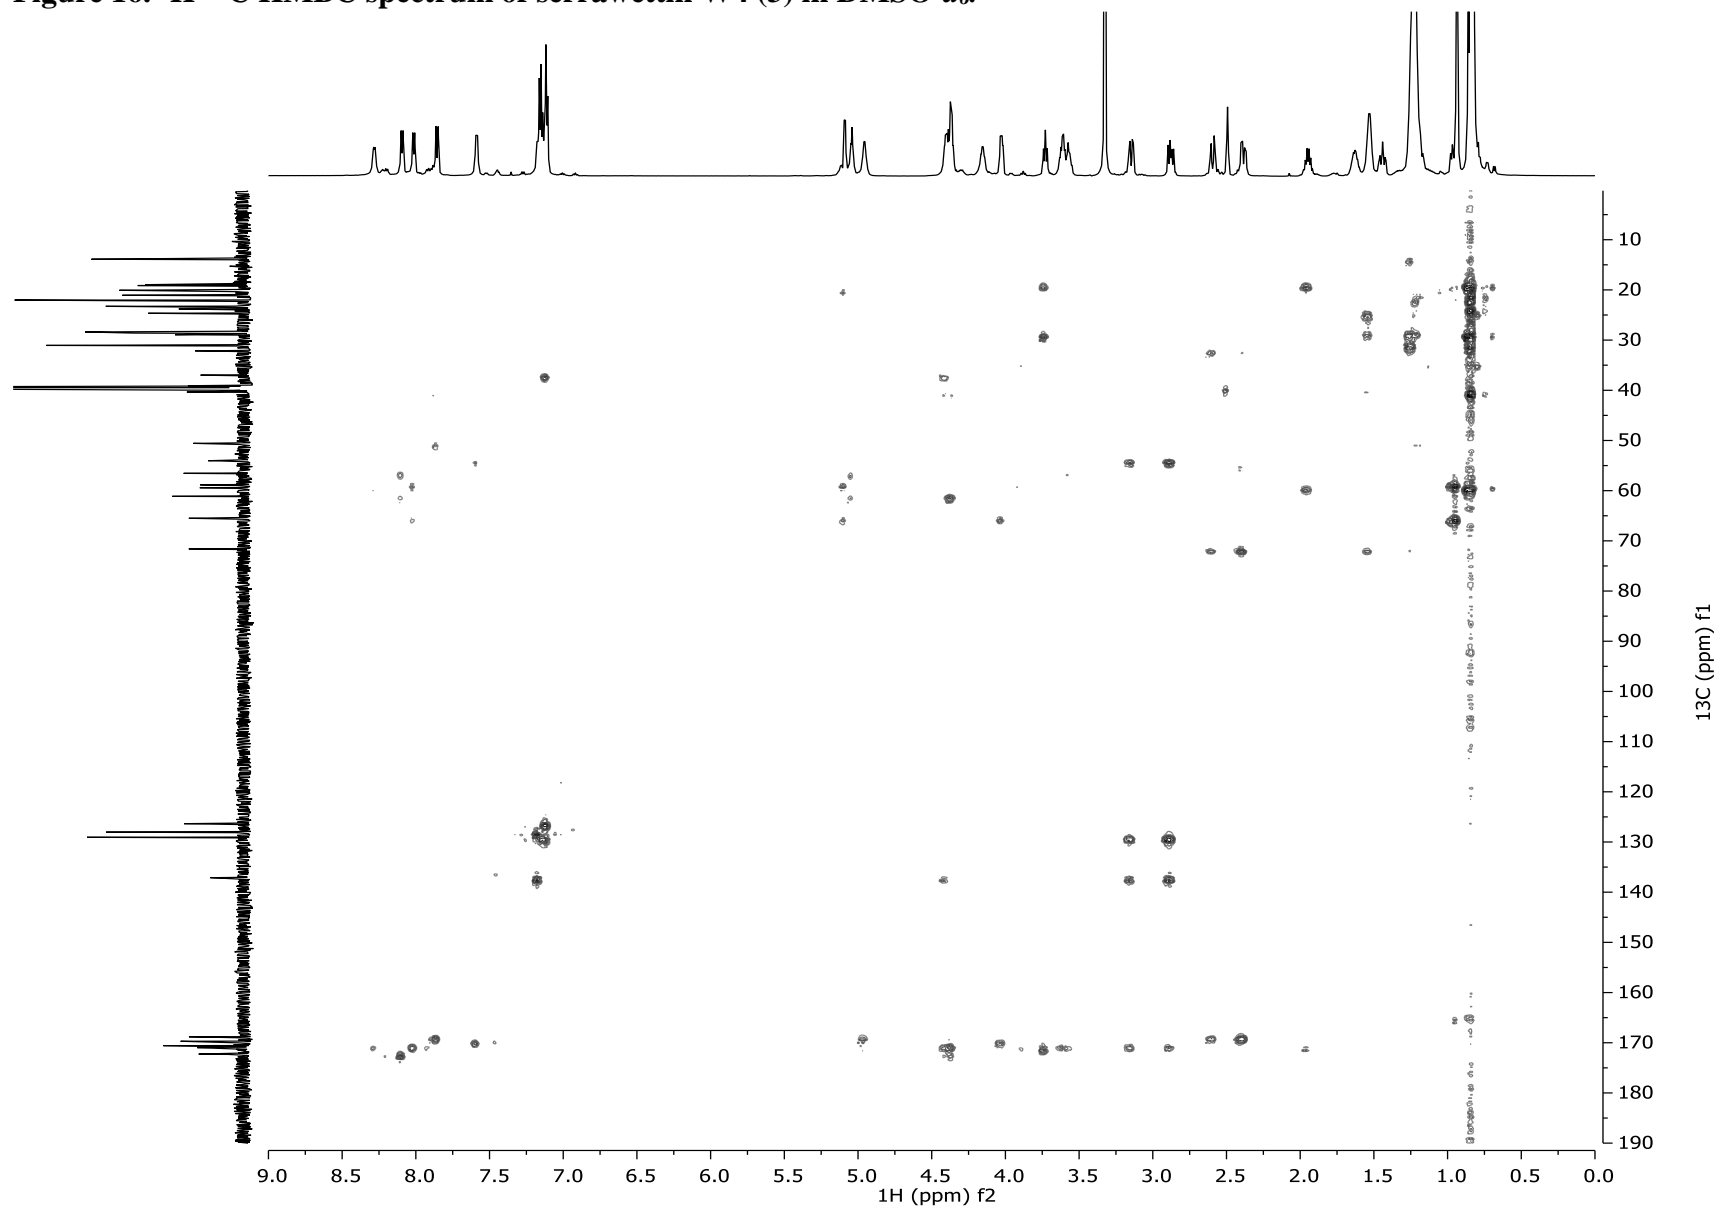



**Figure 17.  $^1\text{H}$  NMR spectrum of serrawettin W5 (4) in  $\text{DMSO-}d_6$  (600 MHz).**

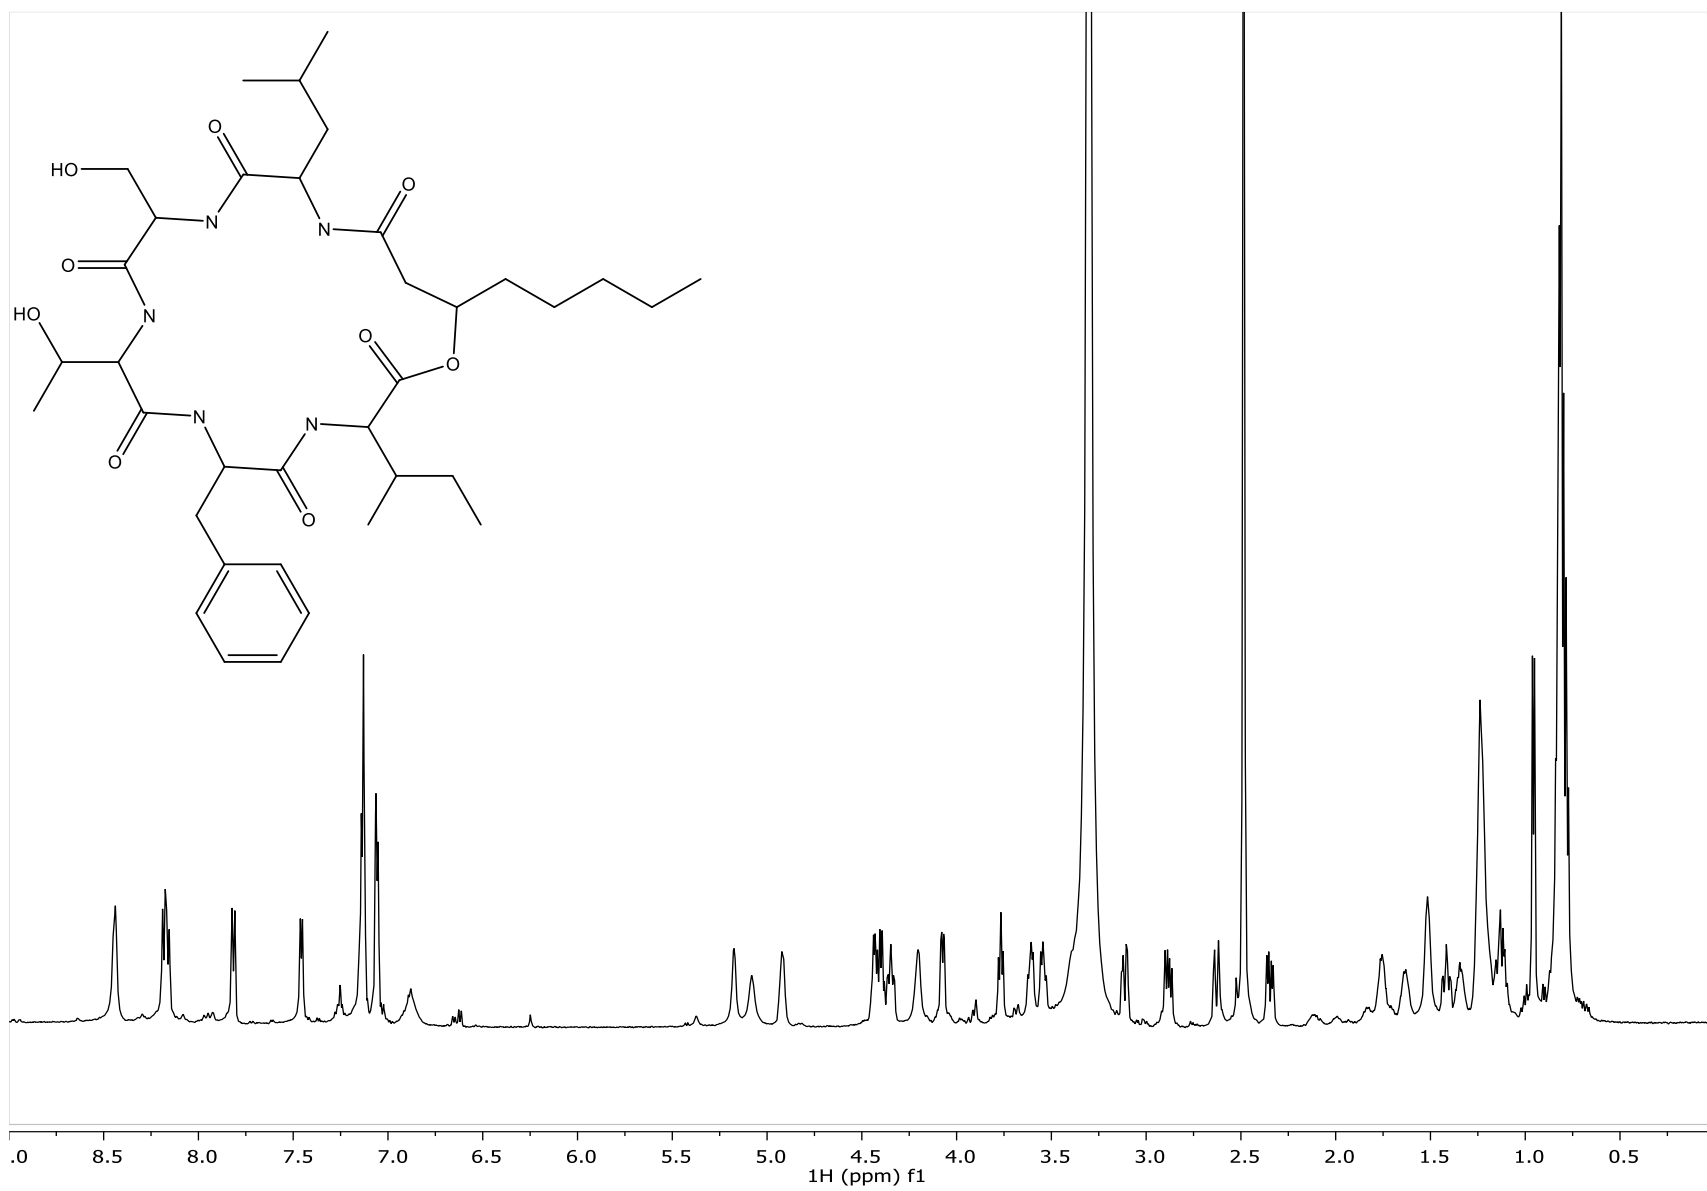



Figure 19.  $^1\text{H}$ - $^{13}\text{C}$  HSQC spectrum of serrawettin W5 (4) in  $\text{DMSO-}d_6$ .

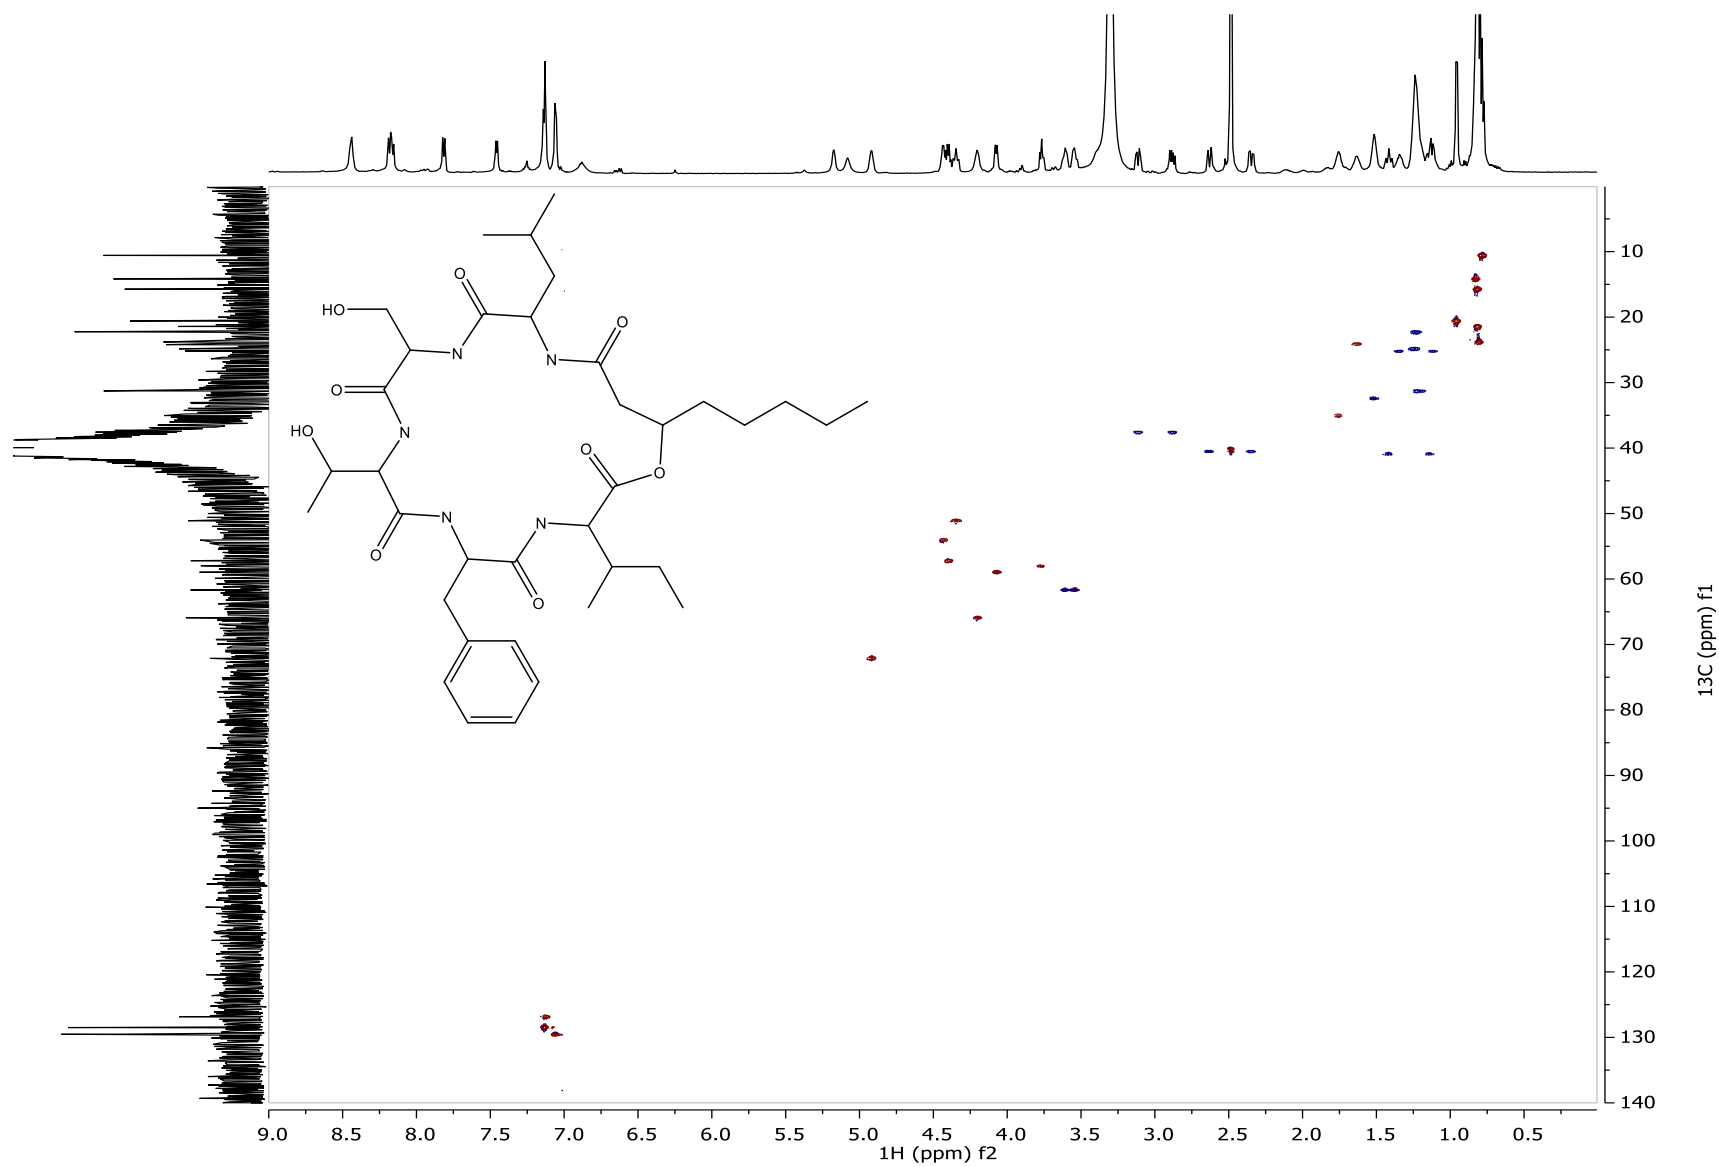

Figure 20.  $^1\text{H}$ - $^1\text{H}$  dqfCOSY spectrum of serrawettin W5 (4) in  $\text{DMSO-}d_6$ .

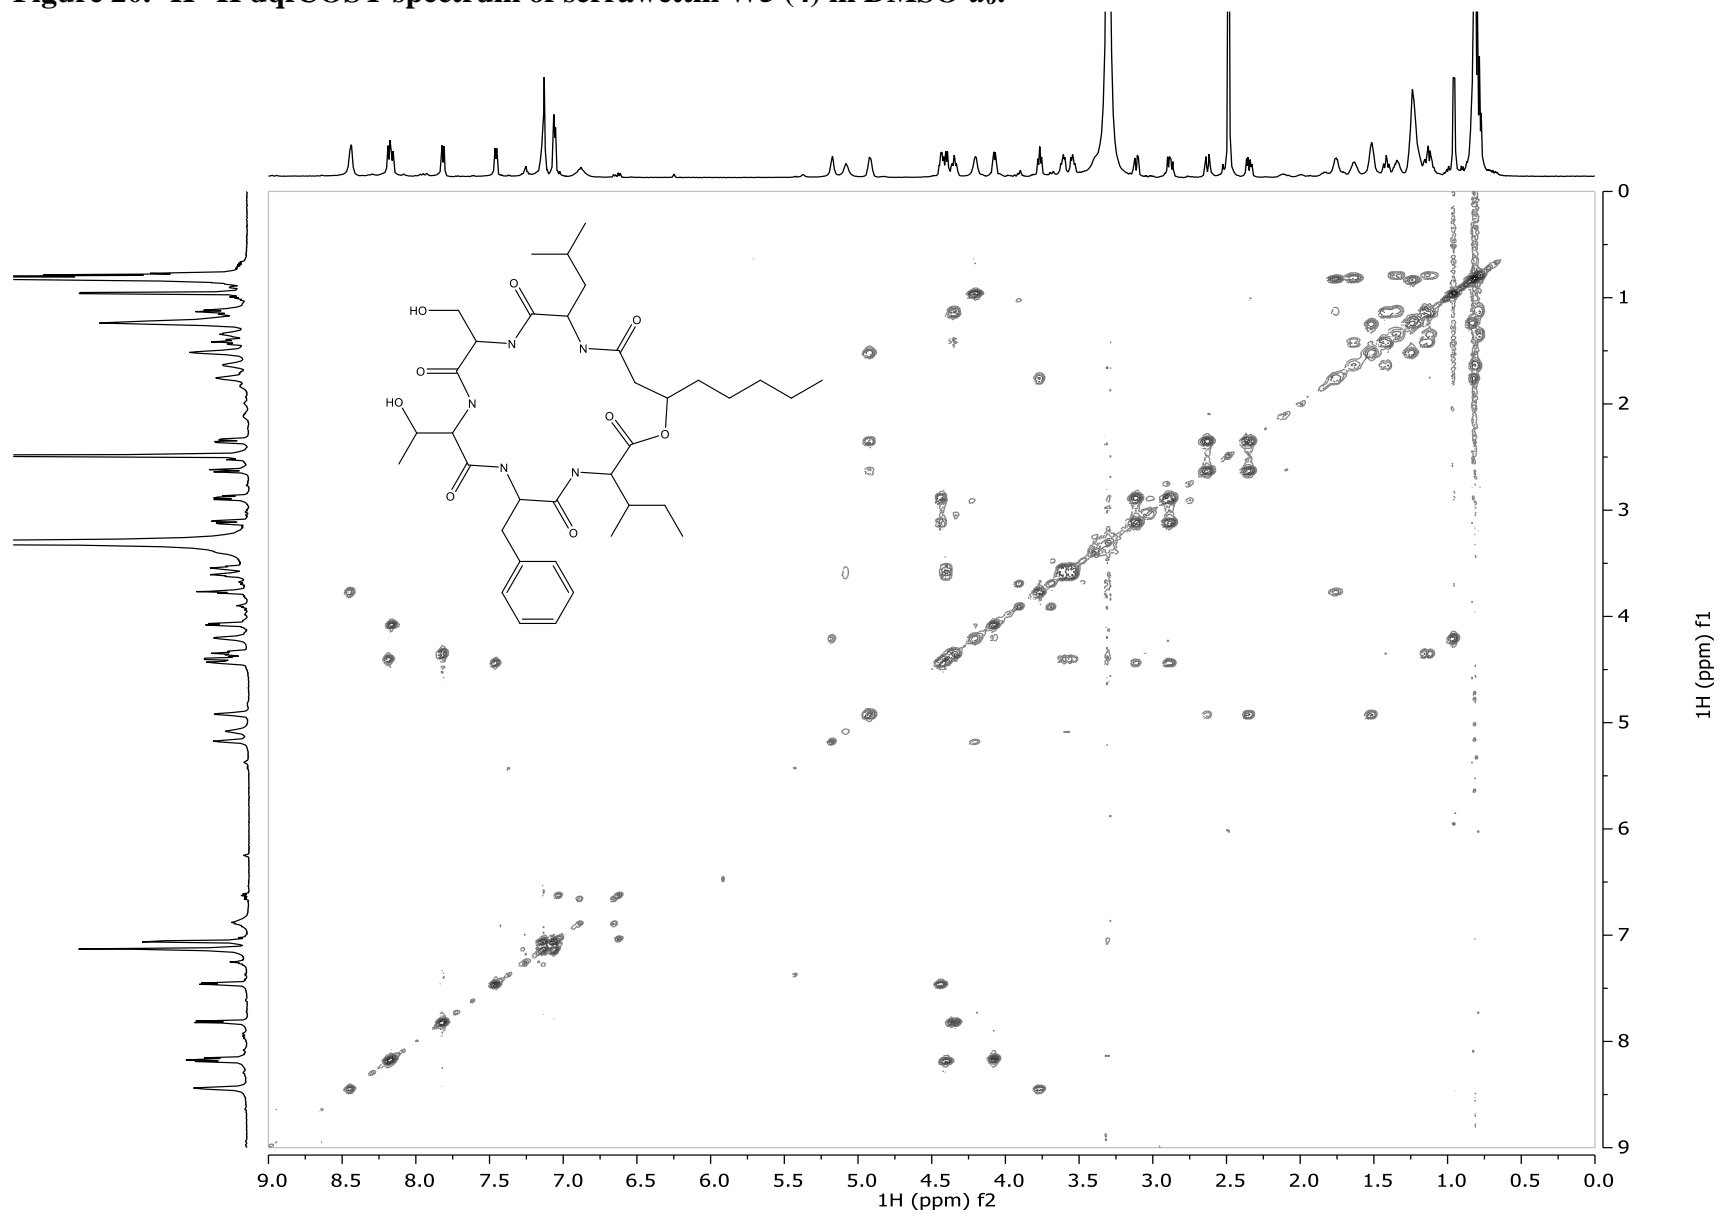

Figure 21.  $^1\text{H}$ - $^1\text{H}$  TOCSY spectrum of serrawettin W5 (4) in  $\text{DMSO-}d_6$ .

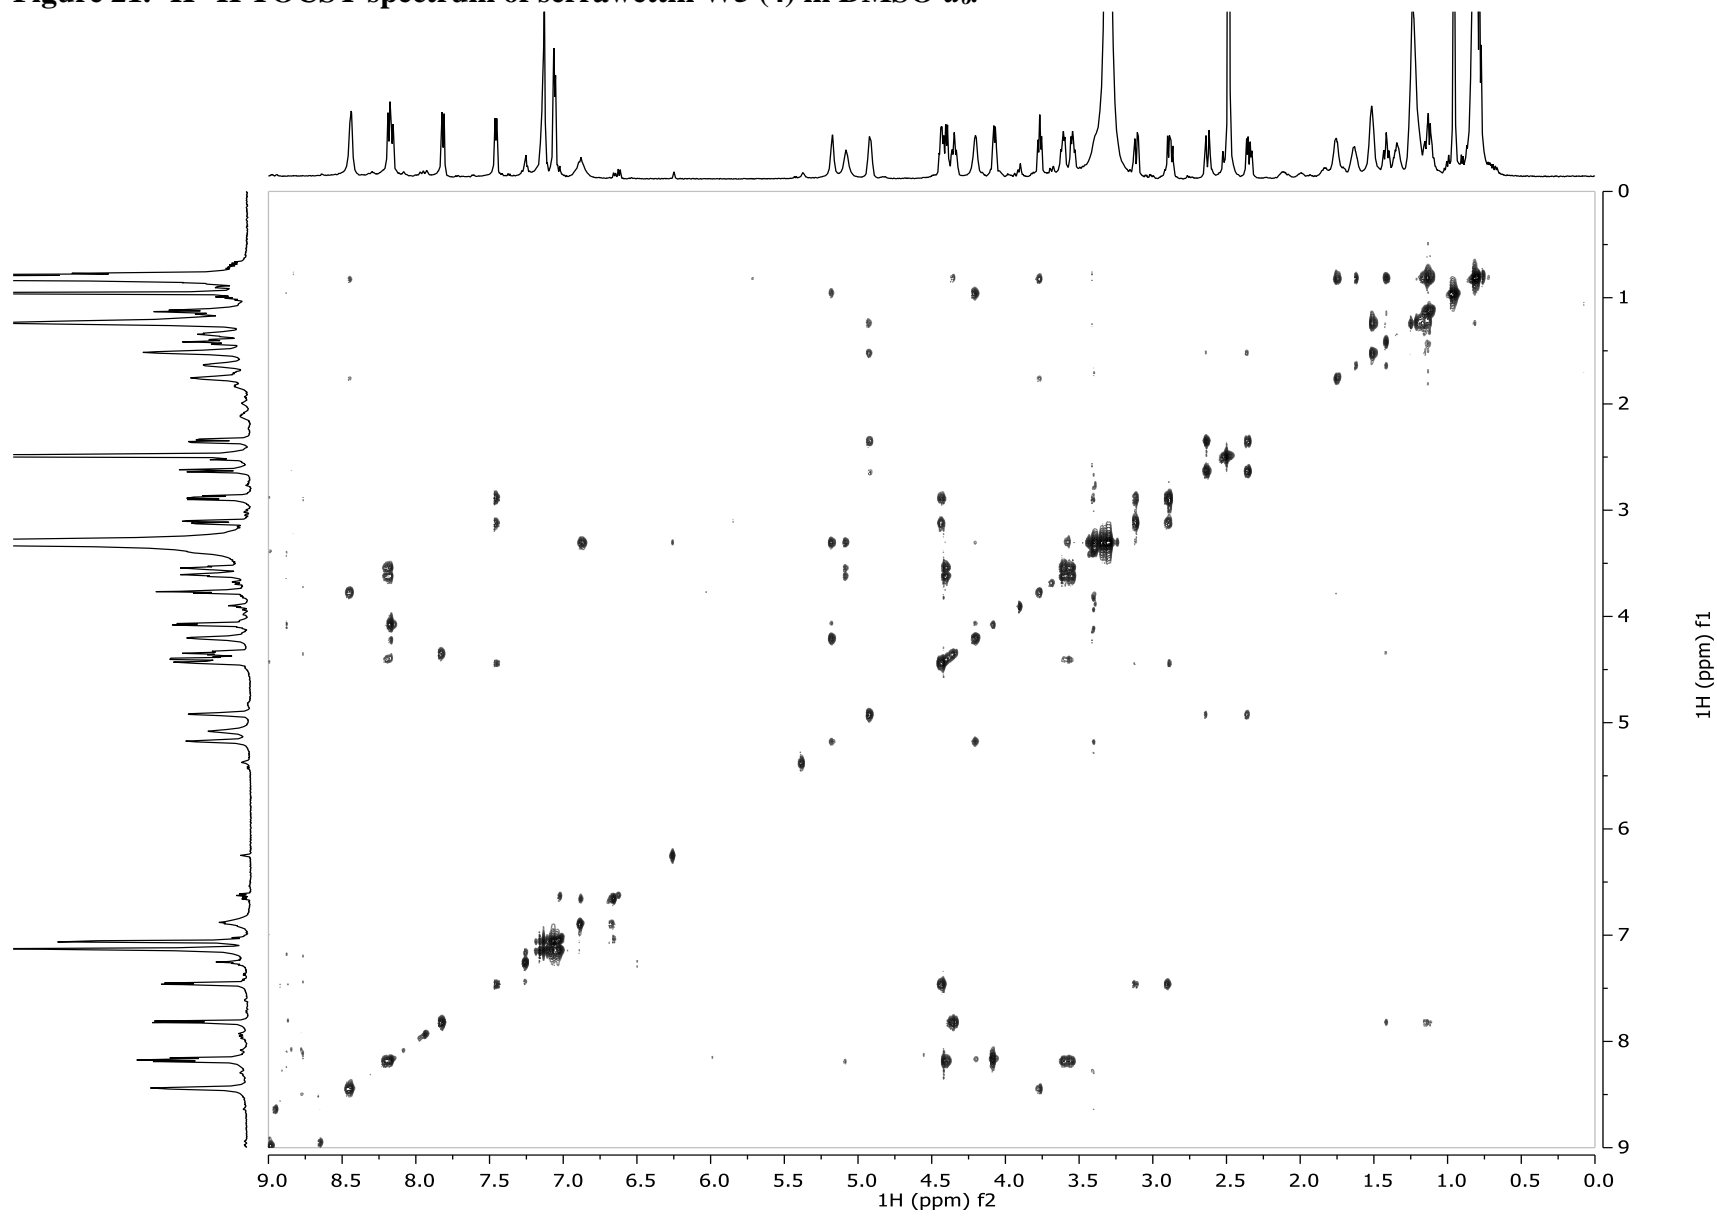

Figure 22.  $^1\text{H}$ - $^{13}\text{C}$  HMBC spectrum of serrawettin W5 (4) in  $\text{DMSO-}d_6$ .

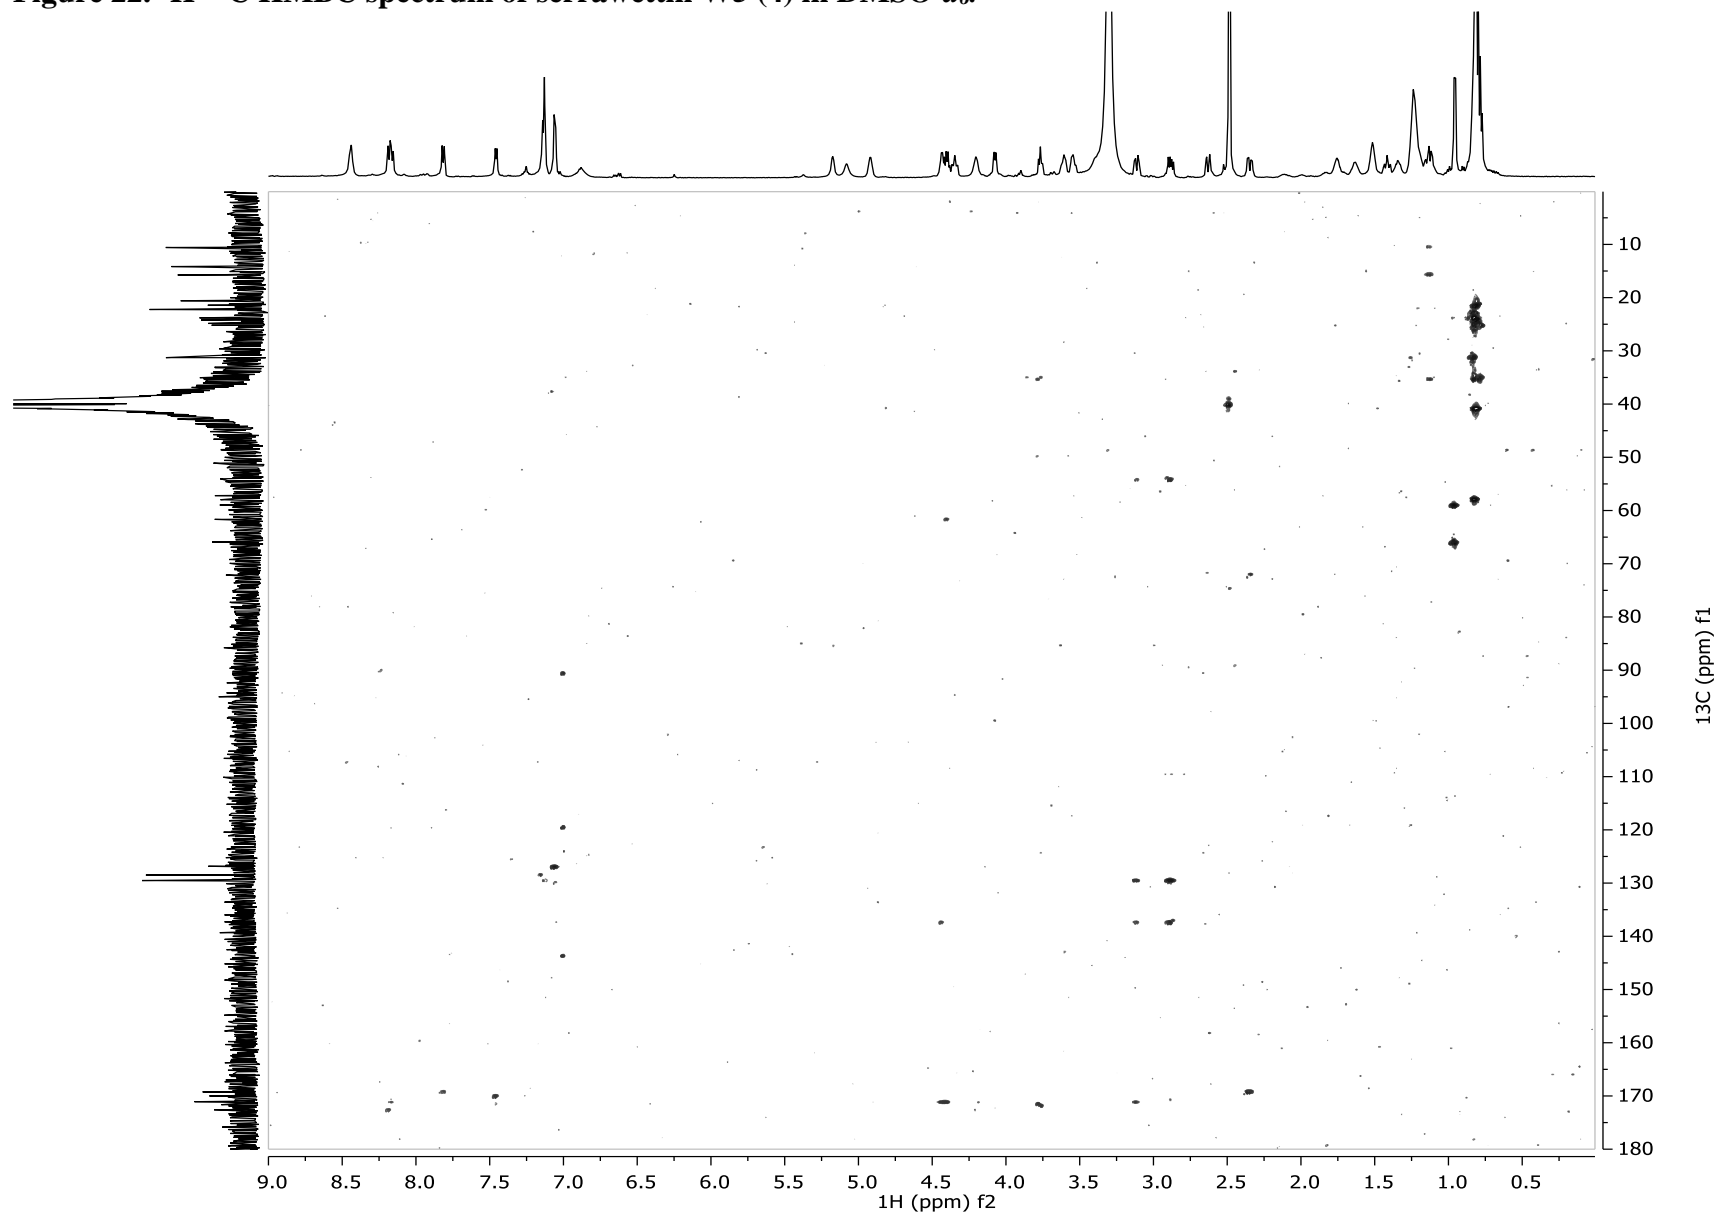

**Figure 23.**  $^1\text{H}$  NMR spectrum of serrawettin W6 (5) in  $\text{DMSO-}d_6$ .

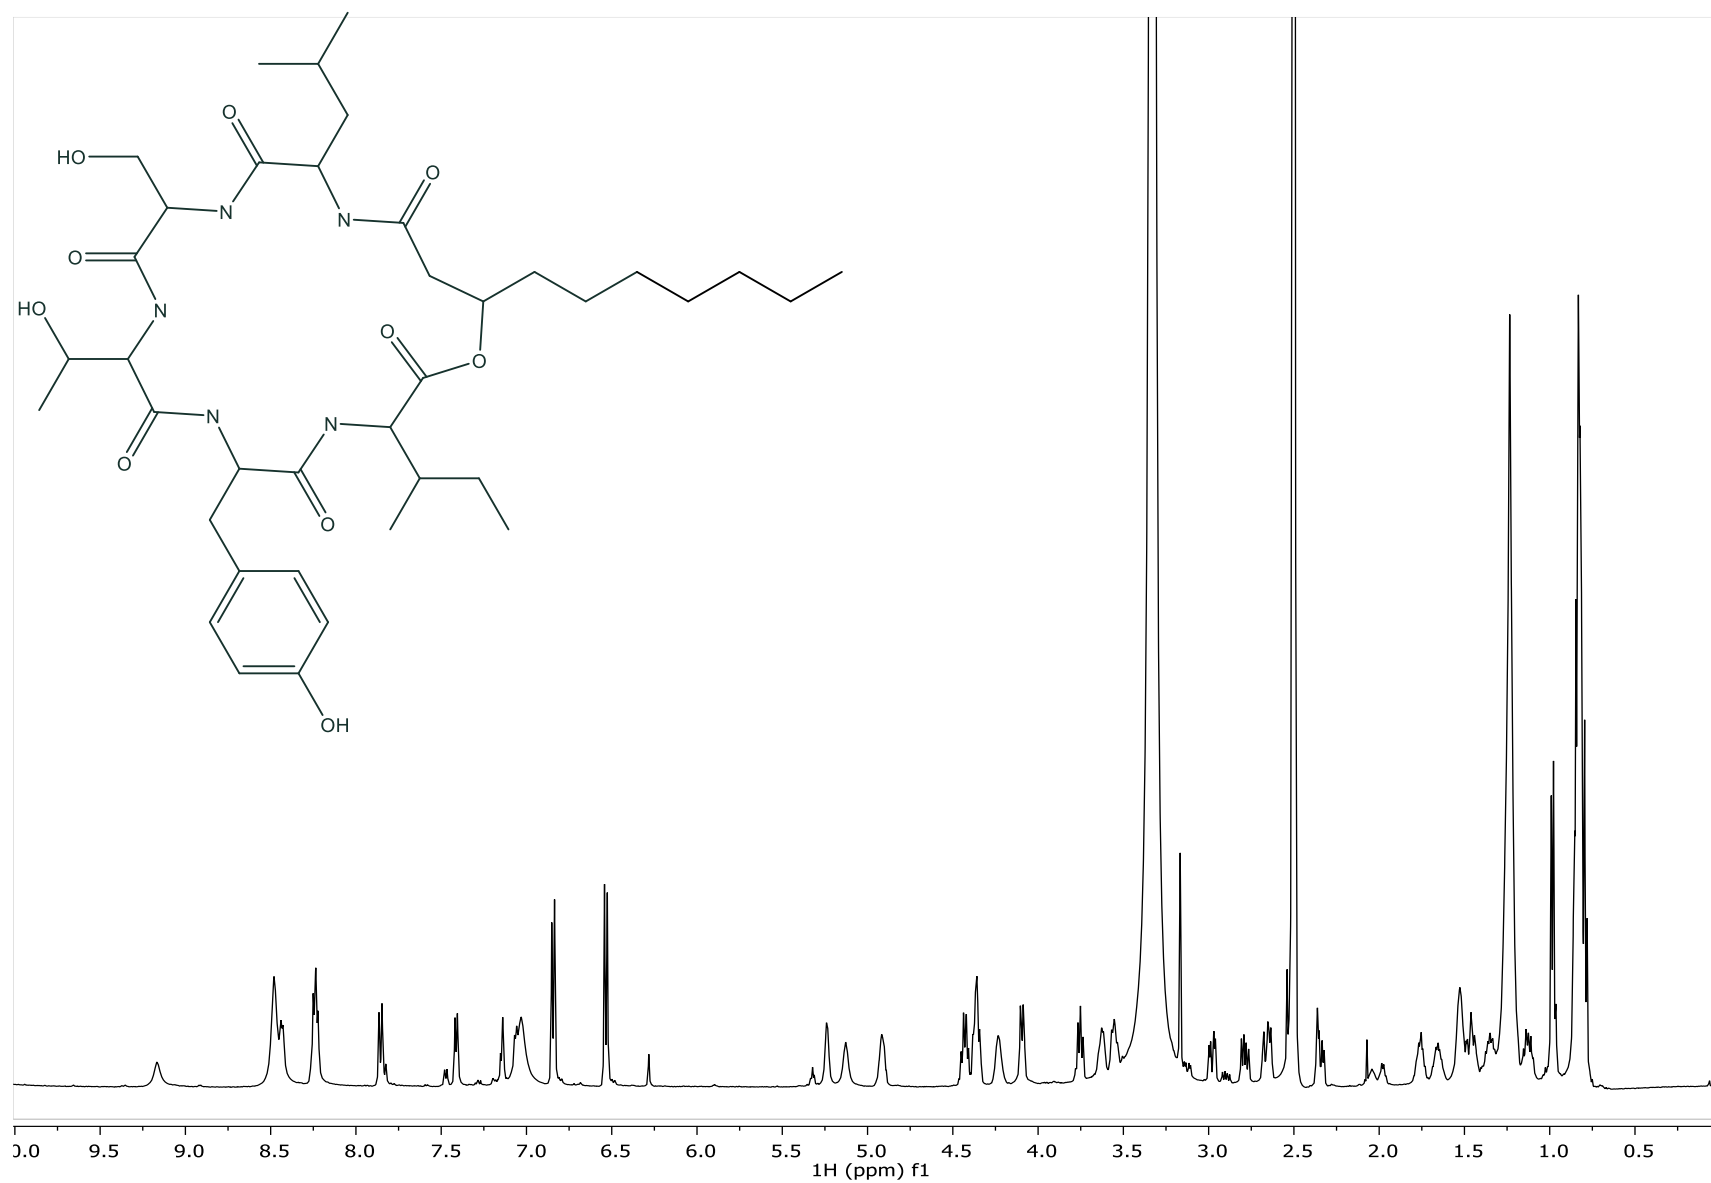

Figure 24.  $^1\text{H}$  -  $^{13}\text{C}$  HSQC spectrum of serrawettin W6 (5) in  $\text{DMSO-}d_6$ .

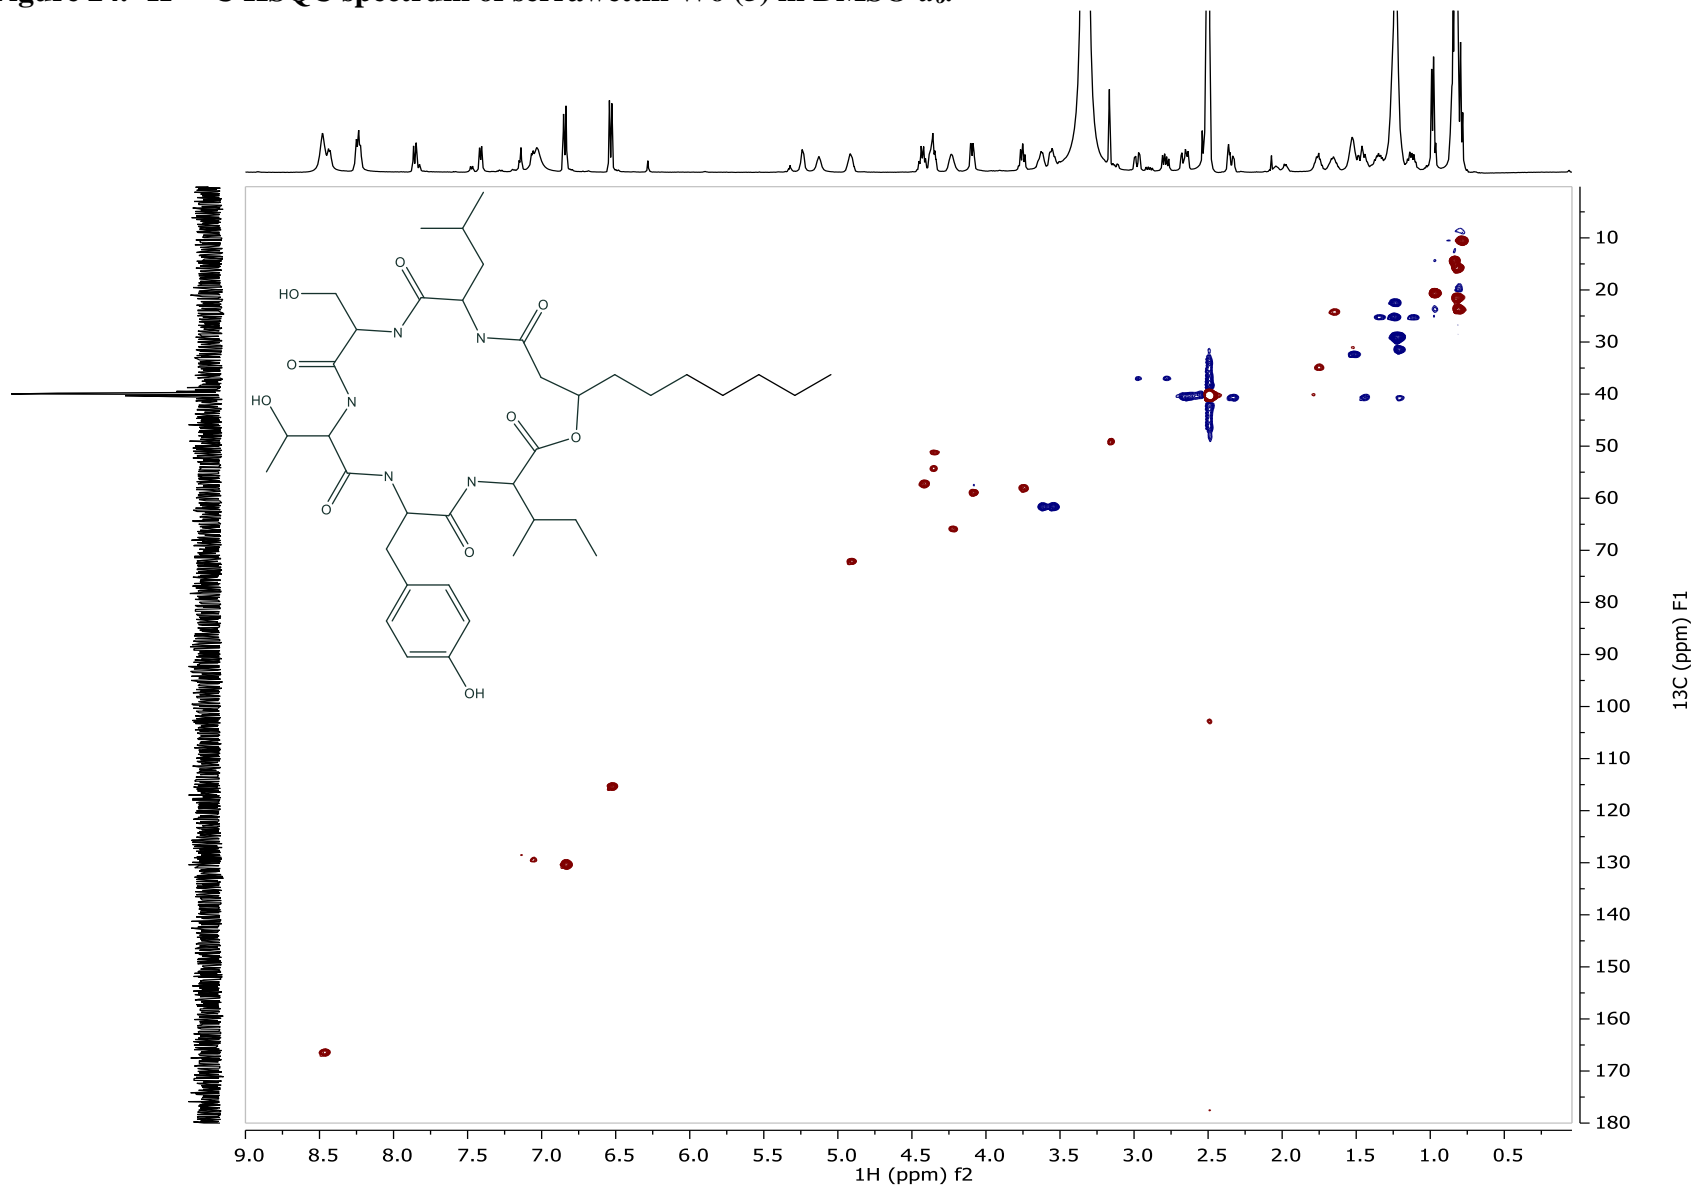



Figure 25.  $^1\text{H}$ - $^1\text{H}$  dqfCOSY spectrum of serrawettin W6 (5) in  $\text{DMSO-}d_6$ .

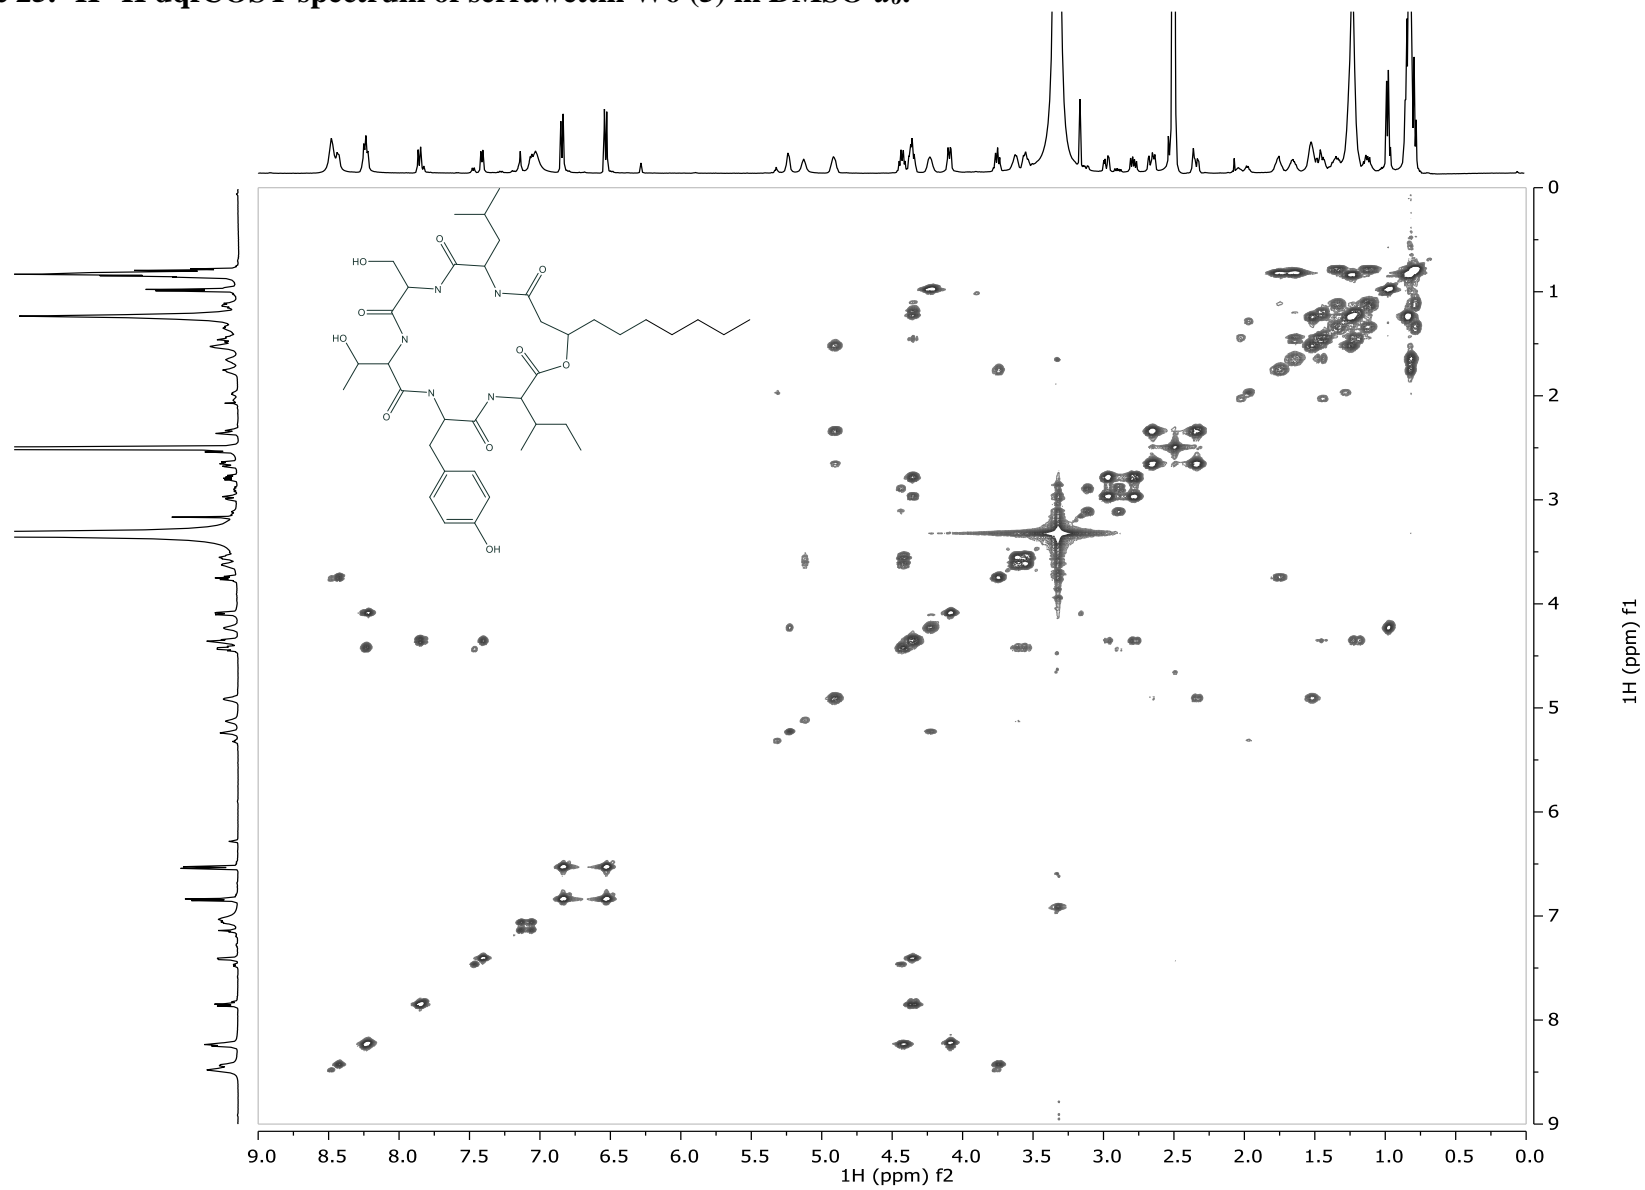

Figure 26.  $^1\text{H}$ - $^1\text{H}$  TOCSY spectrum of serrawettin W6 (5) in  $\text{DMSO-}d_6$ .

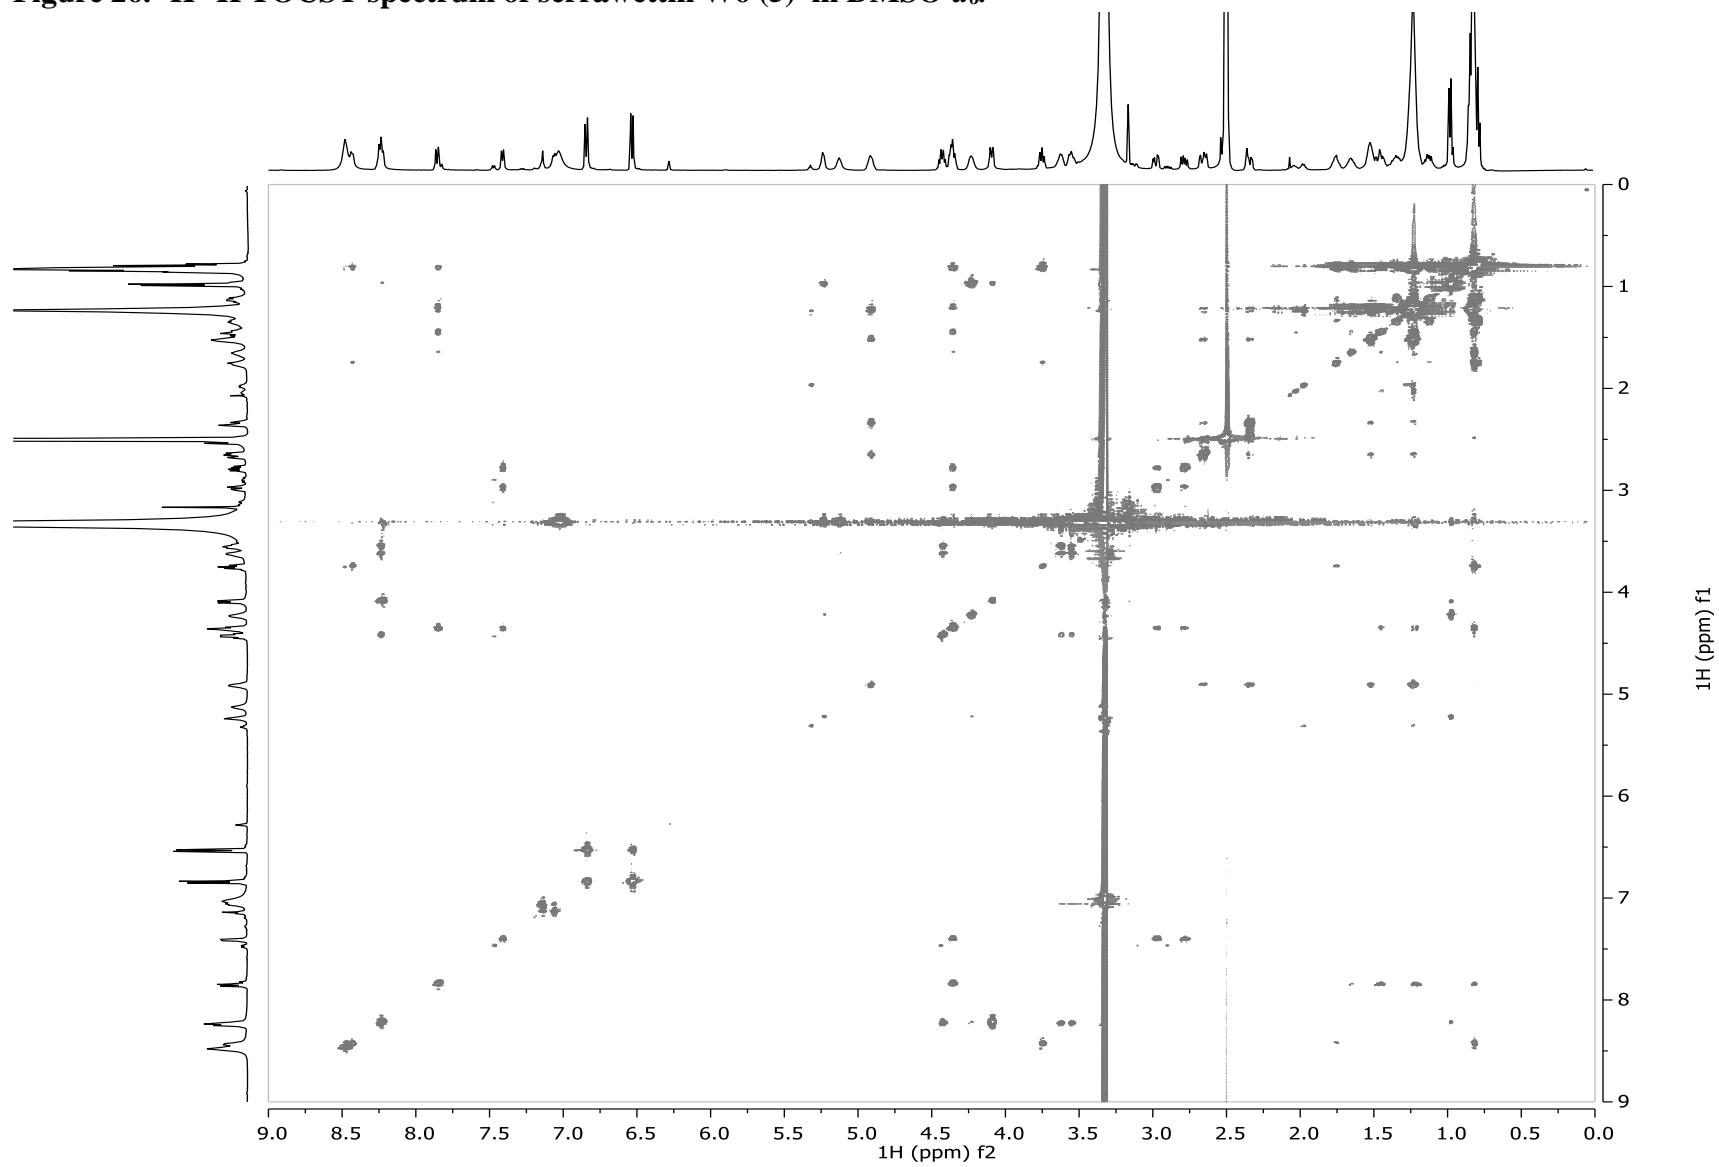

Figure 27.  $^1\text{H}$ - $^{13}\text{C}$  HMBC spectrum of serrawettin W6 (5) in  $\text{DMSO-}d_6$ .

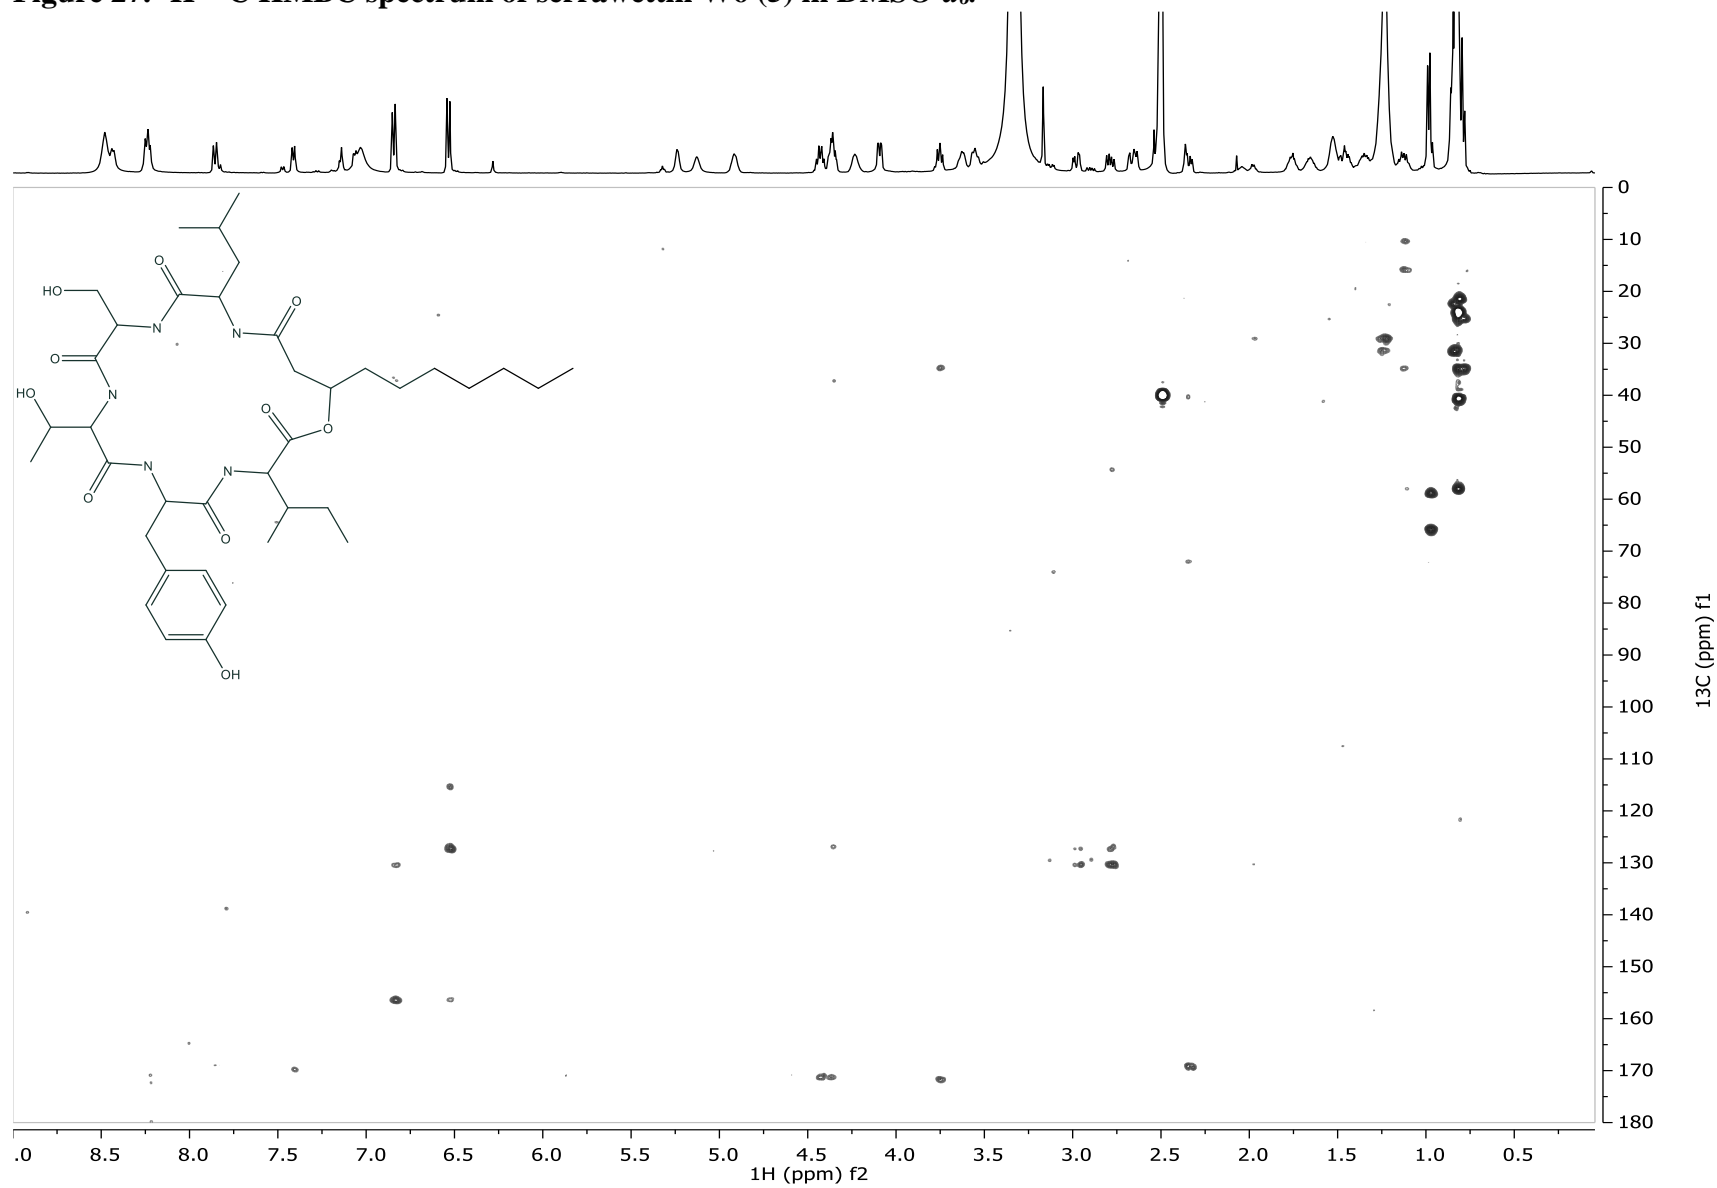

**Table 8. Selected COSY and HMBC correlations (DMSO-*d*<sub>6</sub>) for serrawettin W2 (2).**

| serrawettin W2 (2) |                   |                   |
|--------------------|-------------------|-------------------|
| position           | COSY Correlations | HMBC Correlations |
| 1                  |                   |                   |
| 2                  | 3                 | 1, 3, 4           |
| 3                  | 2, 4              | 1                 |
| 4                  | 3                 |                   |
| 5                  |                   |                   |
| 6                  |                   |                   |
| 7                  |                   |                   |
| 8                  |                   |                   |
| 9                  | 10                |                   |
| 10                 | 9                 |                   |
| 11                 | 12                | 1, 12             |
| 12                 | 11, 13', 13''     | 13                |
| 13                 | 12, 14            | 14, 15, 16        |
| 14                 | 13', 13'', 15, 16 | 13, 15, 16        |
| 15                 | 14                | 13, 14            |
| 16                 | 14                | 13, 14            |
| 17                 |                   |                   |
| 18                 | 19                | 19, 20, 22        |
| 19                 | 18, 20', 20''     | 20, 22            |
| 20                 | 19, 21            | 22                |
| 21                 | 20', 20''         |                   |
| 22                 |                   |                   |
| 23                 | 24                | 24, 25, 28        |
| 24                 | 23, 25            | 25, 28            |
| 25                 | 24, 26, 27        | 24                |
| 26                 | 25                | 24, 25, 27        |
| 27                 | 25                | 24, 25            |
| 28                 |                   |                   |
| 29                 | 30                | 28, 30, 38        |
| 30                 | 29, 31', 31''     | 28, 31, 32        |

|    |               |                    |
|----|---------------|--------------------|
| 31 | 30            | 28, 32, 34, 36, 30 |
| 32 |               |                    |
| 33 | 34            | 32                 |
| 34 | 33, 35        | 31, 32, 33, 35, 36 |
| 35 | 34, 36        | 32, 33, 34, 36, 37 |
| 36 | 35, 37        | 31, 32, 33, 34, 37 |
| 37 | 36            | 32, 33, 34, 35, 37 |
| 38 |               |                    |
| 39 | 40            | 40, 45             |
| 40 | 39, 41        | 41, 42, 44, 45     |
| 41 | 40, 42', 42'' | 40, 43, 44, 45     |
| 42 | 41,43         | 40, 41, 42, 43, 44 |
| 43 | 42            | 41, 42, 44         |
| 44 |               | 40, 41, 42         |
| 45 |               |                    |

---

**Table 9. Selected COSY and HMBC correlations (DMSO-*d*<sub>6</sub>) for serrawettin W4 (3).**

| serrawettin W4 (3) |                   |                    |
|--------------------|-------------------|--------------------|
| position           | COSY Correlations | HMBC Correlations  |
| 1                  |                   |                    |
| 2                  | 3                 | 1, 3, 4            |
| 3                  | 2', 2'', 4        | 2', 2'', 4         |
| 4                  | 3, 5              | 3, 6, 8            |
| 5                  | 4, 6              |                    |
| 6                  | 5, 7              |                    |
| 7                  | 6, 8              |                    |
| 8                  | 7, 9              |                    |
| 9                  | 7, 10             |                    |
| 10                 | 9                 |                    |
| 11                 | 12                | 1, 12              |
| 12                 | 11, 13', 13''     | 13                 |
| 13                 | 12, 14            | 12, 17, 15, 16     |
| 14                 | 13, 15, 16        |                    |
| 15                 | 14                | 13, 16             |
| 16                 | 14                | 13                 |
| 17                 |                   |                    |
| 18                 | 19                | 17, 19, 20         |
| 19                 | 18, 20            | 17, 20, 22         |
| 20                 | 19, 21            | 19, 22             |
| 21                 | 20                | 19, 20             |
| 22                 |                   |                    |
| 23                 | 24                | 22, 24, 25         |
| 24                 | 23, 25            | 25, 28             |
| 25                 | 24, 26, 27        |                    |
| 26                 | 25                | 24, 25, 27         |
| 27                 | 25                | 24, 25             |
| 28                 |                   |                    |
| 29                 | 30                | 28, 30             |
| 30                 | 29, 31', 31''     | 31, 32, 38         |
| 31                 | 30                | 30, 32, 34, 36, 38 |
| 32                 |                   |                    |

|    |            |                        |
|----|------------|------------------------|
| 33 | 34         | 31, 32, 34, 35, 36, 37 |
| 34 | 33, 35     | 31, 32, 33, 35, 36     |
| 35 | 34, 36     | 31, 32, 33, 34, 36, 37 |
| 36 | 35, 37     | 31, 32, 33, 34, 35, 37 |
| 37 | 36         | 31, 32, 33, 34, 35, 36 |
| 38 |            |                        |
| 39 | 40         | 38                     |
| 40 | 39, 41     | 38, 41, 42, 45         |
| 41 | 40, 42, 44 | 38, 40                 |
| 42 |            | 40, 41                 |
| 43 | N/A        | N/A                    |
| 44 | 41         | 40, 41, 42             |
| 45 |            |                        |

---

**Table 10. Selected COSY and HMBC correlations (DMSO-*d*<sub>6</sub>) for serrawettin W5 (4).**

| serrawettin W5 (4) |                   |                   |
|--------------------|-------------------|-------------------|
| position           | COSY Correlations | HMBC Correlations |
| 1                  |                   |                   |
| 2                  | 3                 | 1, 11             |
| 3                  | 2', 2'', 4        |                   |
| 4                  | 3, 5              |                   |
| 5                  | 4, 6              |                   |
| 6                  | 5, 7              |                   |
| 7                  | 6, 8              |                   |
| 8                  | 7                 | 5, 7              |
| 9                  | N/A               | N/A               |
| 10                 | N/A               | N/A               |
| 11                 | 12                |                   |
| 12                 | 11, 13', 13''     |                   |
| 13                 | 12, 14            |                   |
| 14                 | 13', 15, 16       |                   |
| 15                 | 14                | 13, 14, 16        |
| 16                 | 14                | 13, 14            |
| 17                 |                   |                   |
| 18                 | 19                | 17                |
| 19                 | 18, 20            | 20, 22            |
| 20                 | 19, 21            |                   |
| 21                 | 20                |                   |
| 22                 |                   |                   |
| 23                 | 24                | 22                |
| 24                 | 23, 25            |                   |
| 25                 | 24, 26, 27        | 22                |
| 26                 | 25                |                   |
| 27                 | 25                | 24, 25            |
| 28                 |                   |                   |
| 29                 | 30                | 28                |
| 30                 | 29, 31', 32''     | 31', 31''         |
| 31                 | 30                | 30, 34, 36        |
| 32                 |                   |                   |



|    |             |                |
|----|-------------|----------------|
| 33 | 34          | 34, 36         |
| 34 | 33, 35      | 31, 35         |
| 35 | 34, 36      | 33, 37         |
| 36 | 35, 37      | 31, 35         |
| 37 | 38          | 34, 36         |
| 38 |             | 40             |
| 39 | 40          |                |
| 40 | 39, 41      | 38, 41         |
| 41 | 40, 42', 44 | 40, 42         |
| 42 | 41, 43      | 40, 41, 43, 44 |
| 43 | 42', 42''   | 40, 42, 44     |
| 44 | 41          | 40, 41, 42     |
| 45 |             |                |

---

**Table 11. Selected COSY and HMBC correlations (DMSO-*d*<sub>6</sub>) for serrawettin W6 (5).**

| serrawettin W5 (4) |                   |                       |
|--------------------|-------------------|-----------------------|
| position           | COSY Correlations | HMBC Correlations     |
| 1                  |                   |                       |
| 2                  | 3                 | 1                     |
| 3                  | 2', 2'', 4        |                       |
| 4                  | 3, 4, 5           |                       |
| 5                  |                   |                       |
| 6                  |                   |                       |
| 7                  |                   |                       |
| 8                  |                   |                       |
| 9                  |                   |                       |
| 10                 | 9                 |                       |
| 11                 | 12                | 1, 12, 17             |
| 12                 | 11, 13', 13''     | 17                    |
| 13                 | 12, 14            | 16                    |
| 14                 | 13', 13'', 15, 16 |                       |
| 15                 | 14                | 12, 13, 14, 16        |
| 16                 | 14                | 12, 13, 14, 15        |
| 17                 |                   |                       |
| 18                 | 19                | 17, 22                |
| 19                 | 18, 20            | 20, 22                |
| 20                 | 19, 21            |                       |
| 21                 | 20                |                       |
| 22                 |                   | 18, 19, 23, 24        |
| 23                 | 24                | 22                    |
| 24                 | 23, 25            | 22, 28                |
| 25                 | 24, 26, 27        |                       |
| 26                 | 25                |                       |
| 27                 | 27                | 24, 25                |
| 28                 |                   |                       |
| 29                 | 30                | 28                    |
| 30                 | 29, 31', 31''     | 31, 32                |
| 31                 | 30                | 30, 32, 33            |
| 32                 |                   | 30, 31', 31'', 34, 36 |

|    |            |                  |
|----|------------|------------------|
| 33 | 34         | 35               |
| 34 | 33         | 32, 35           |
| 35 |            |                  |
| 36 | 37         | 28, 32, 33       |
| 37 | 36         | 33, 35           |
| 38 |            |                  |
| 39 | 40         |                  |
| 40 | 39, 41     | 42", 43', 44     |
| 41 | 40, 42, 44 | 40, 42", 43', 44 |
| 42 | 41, 43,    | 40, 41, 43, 44   |
| 43 | 42         | 40, 41,42        |
| 44 | 41         | 40, 41,42        |
| 45 |            |                  |

---

**Figure 28. Selected ion trace for  $m/z$  713-717 for serrawettin W2 (2) after FDAA derivatization.**

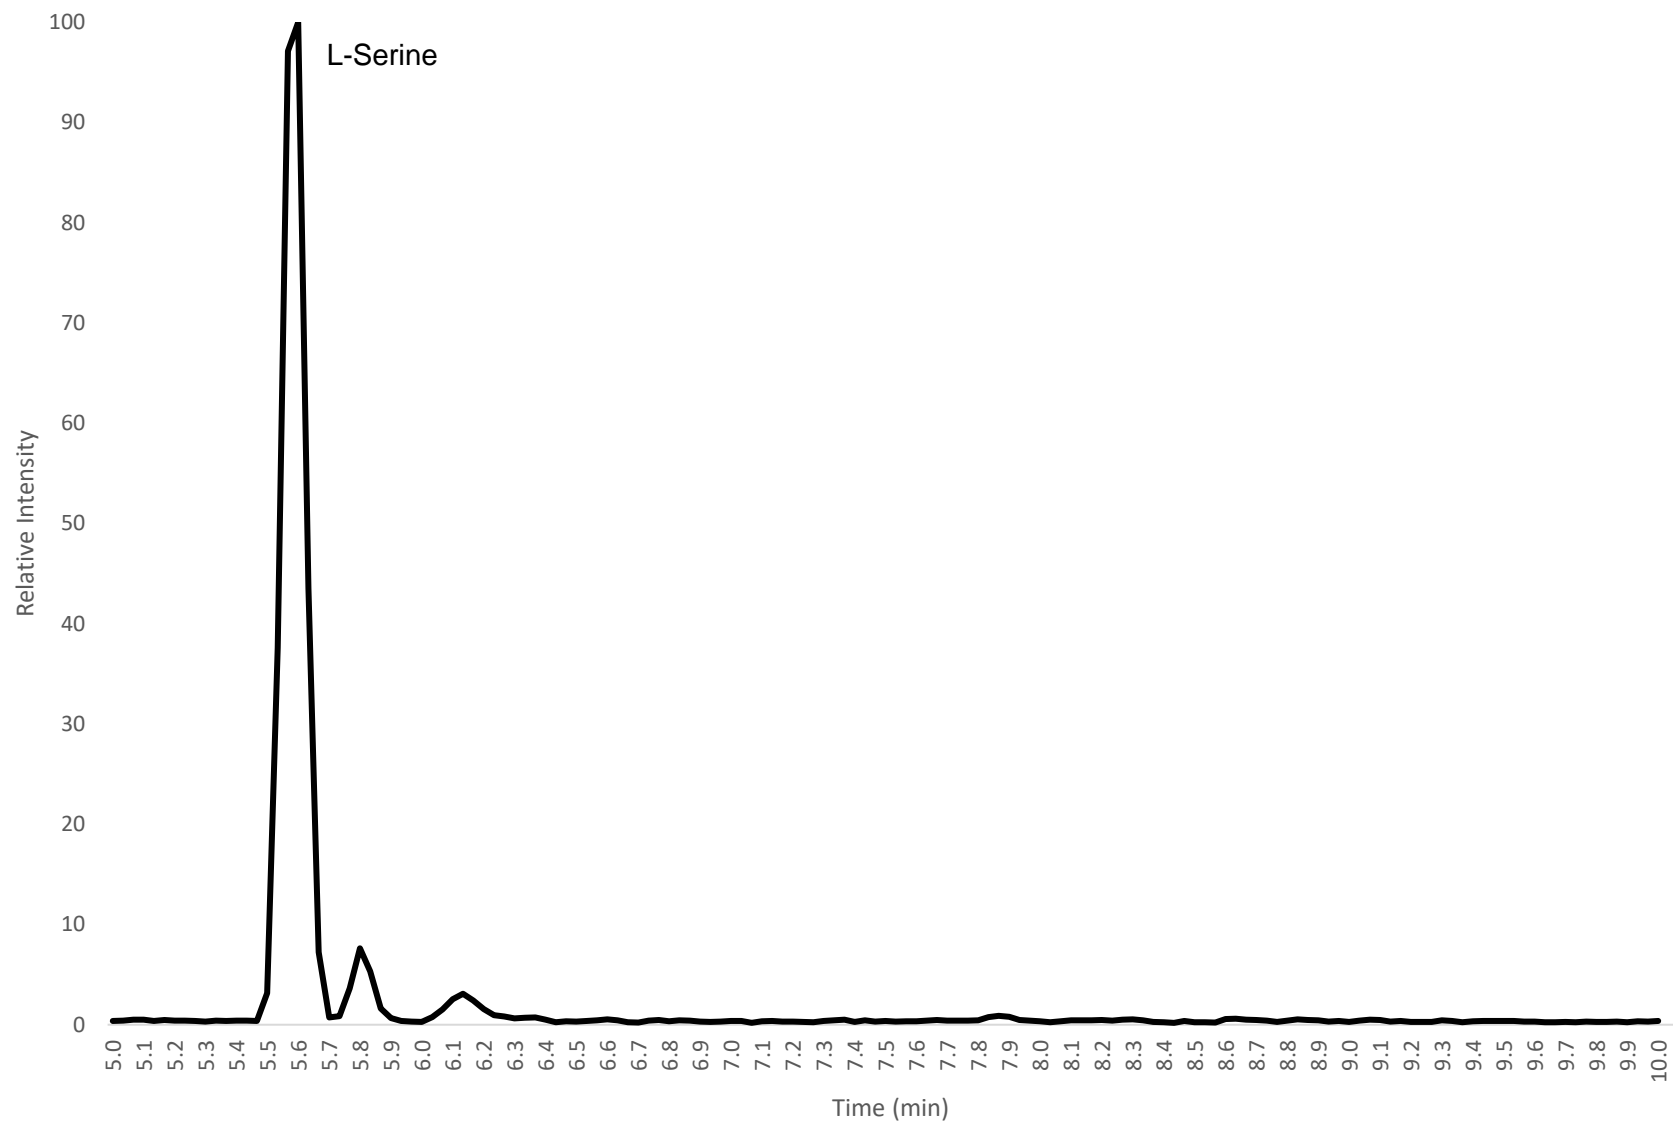

**Figure 29. Selected ion trace for  $m/z$  741-745 for serrawettin W2 (2) after FDAA derivatization.**

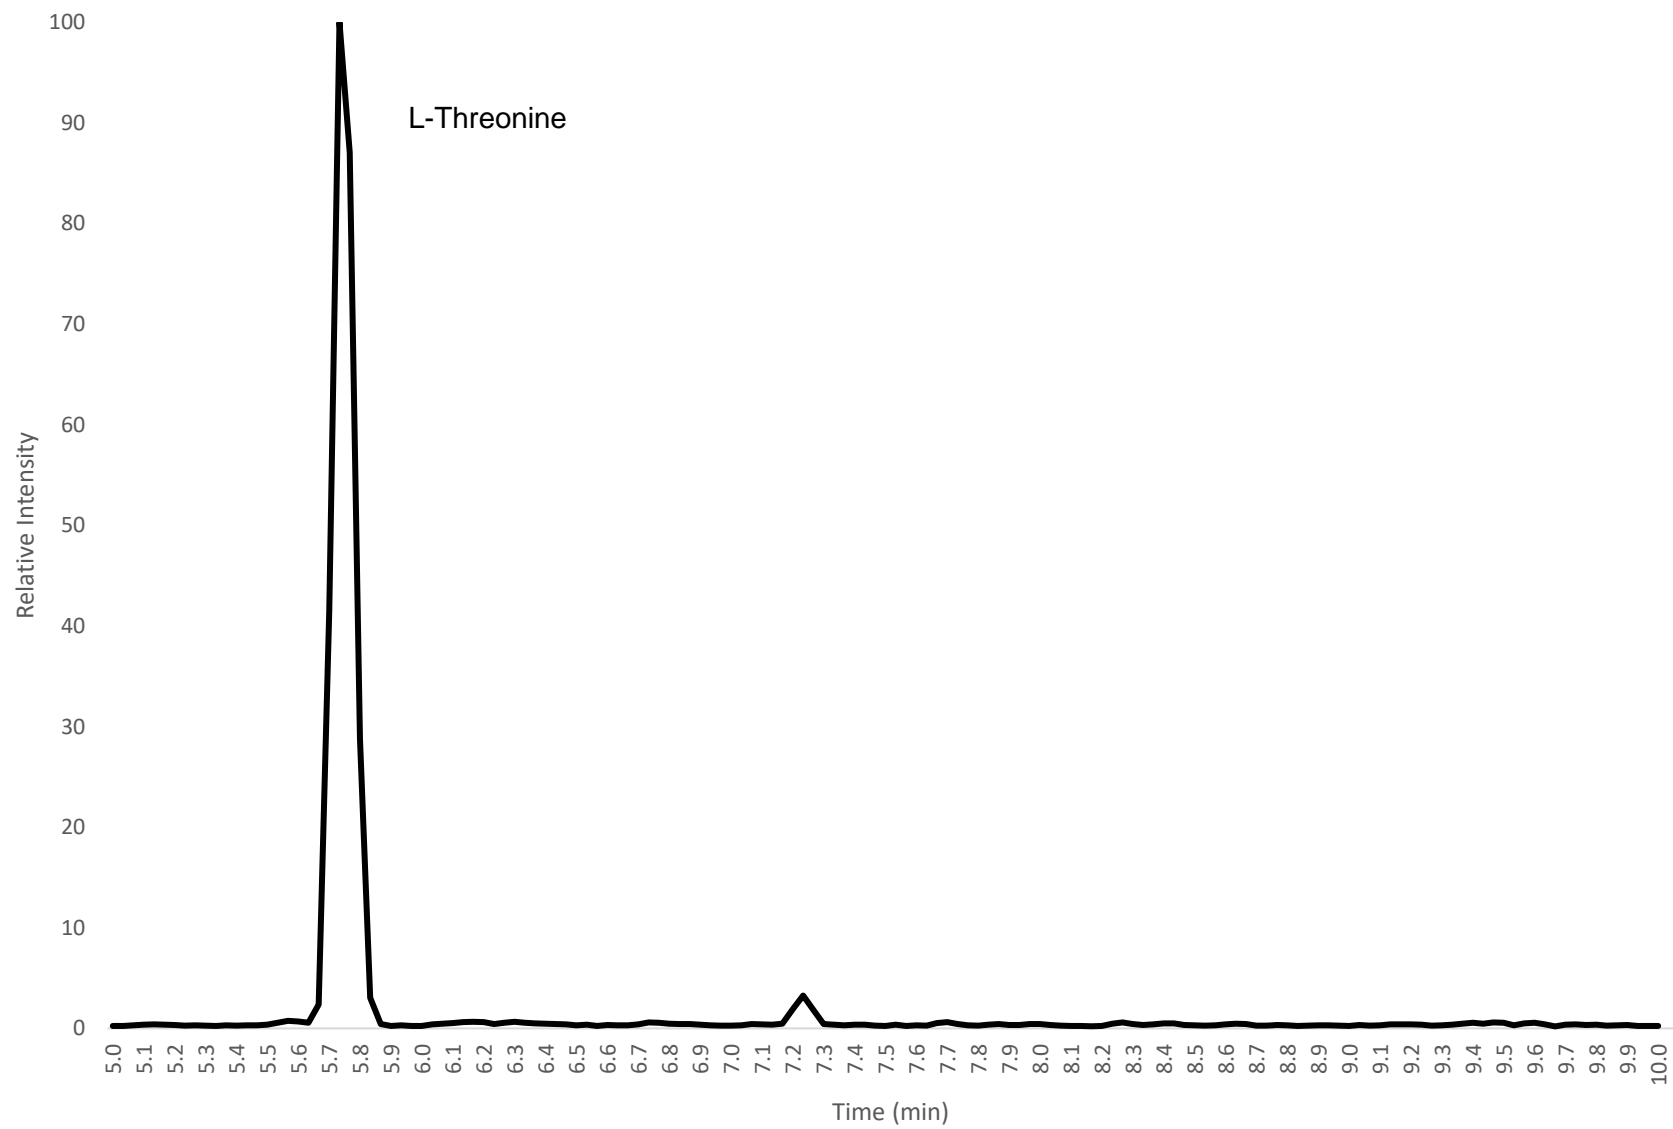

**Figure 30. Selected ion trace for  $m/z$  765-769 for serrawettin W2 (2) after FDAA derivatization.**

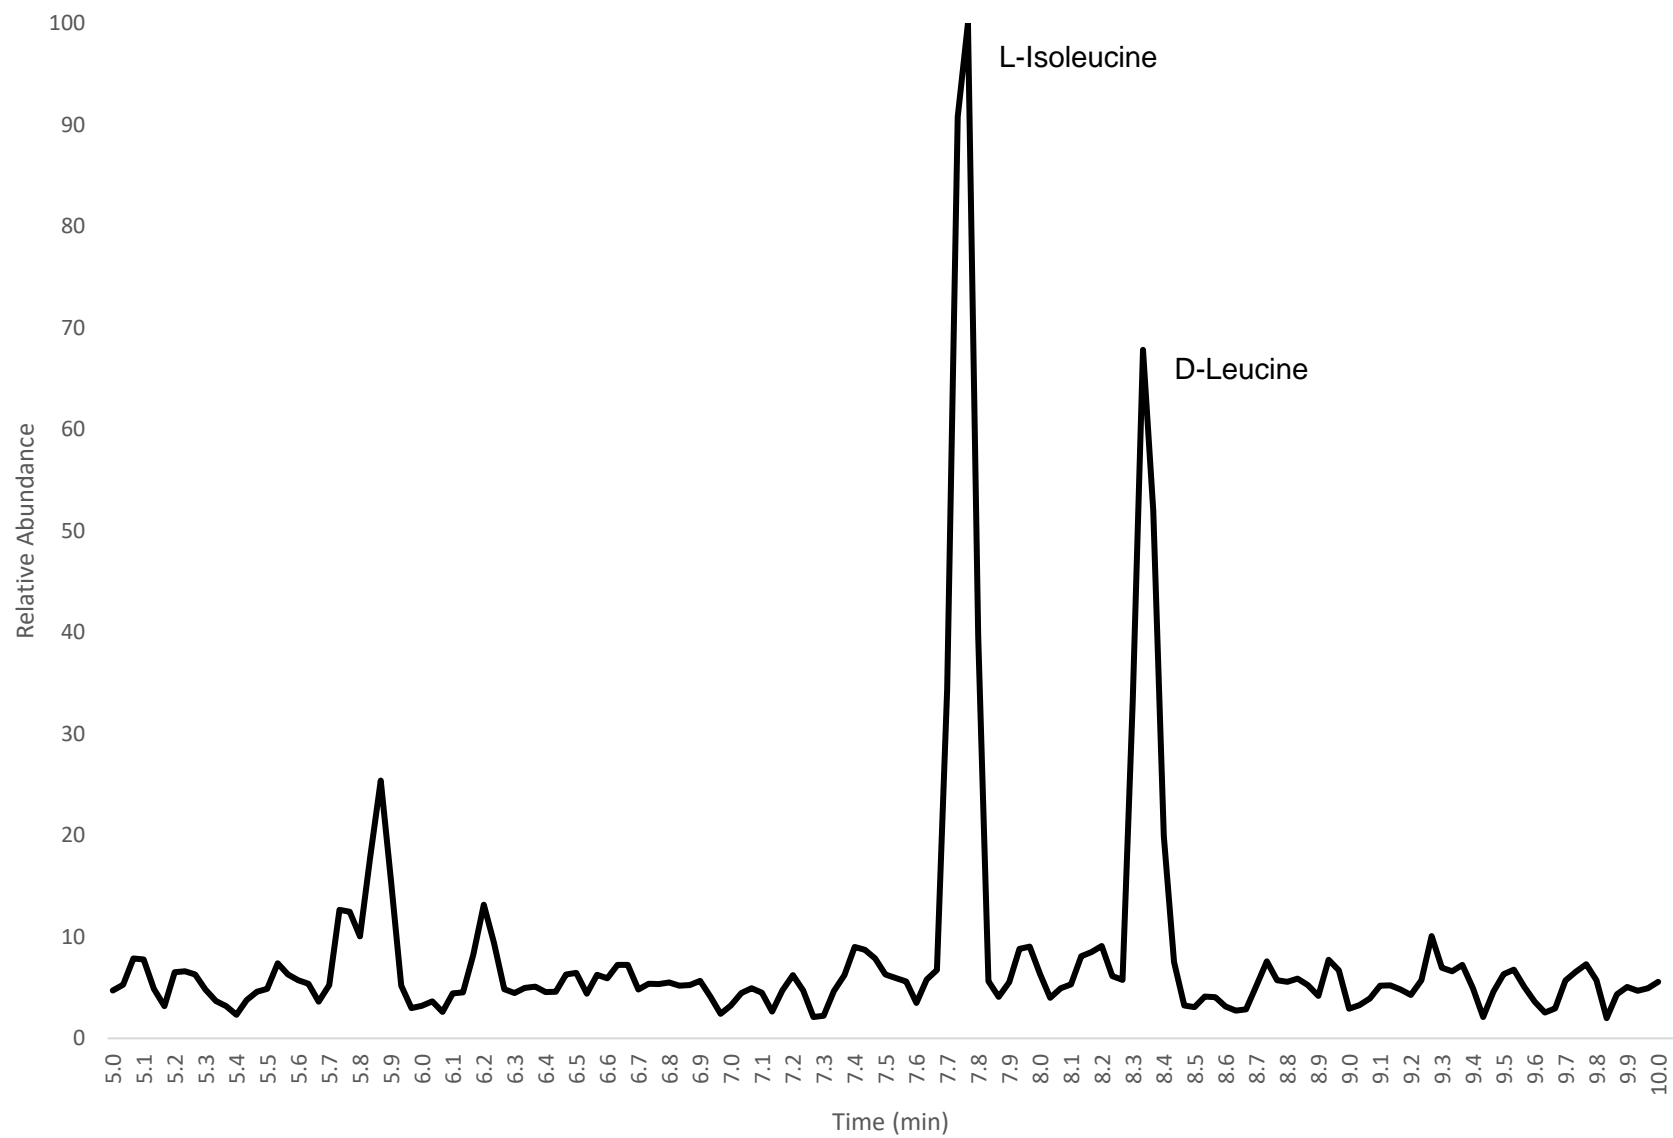

**Figure 31. Selected ion trace for  $m/z$  833-837 for serrawettin W2 (2) after FDAA derivatization.**

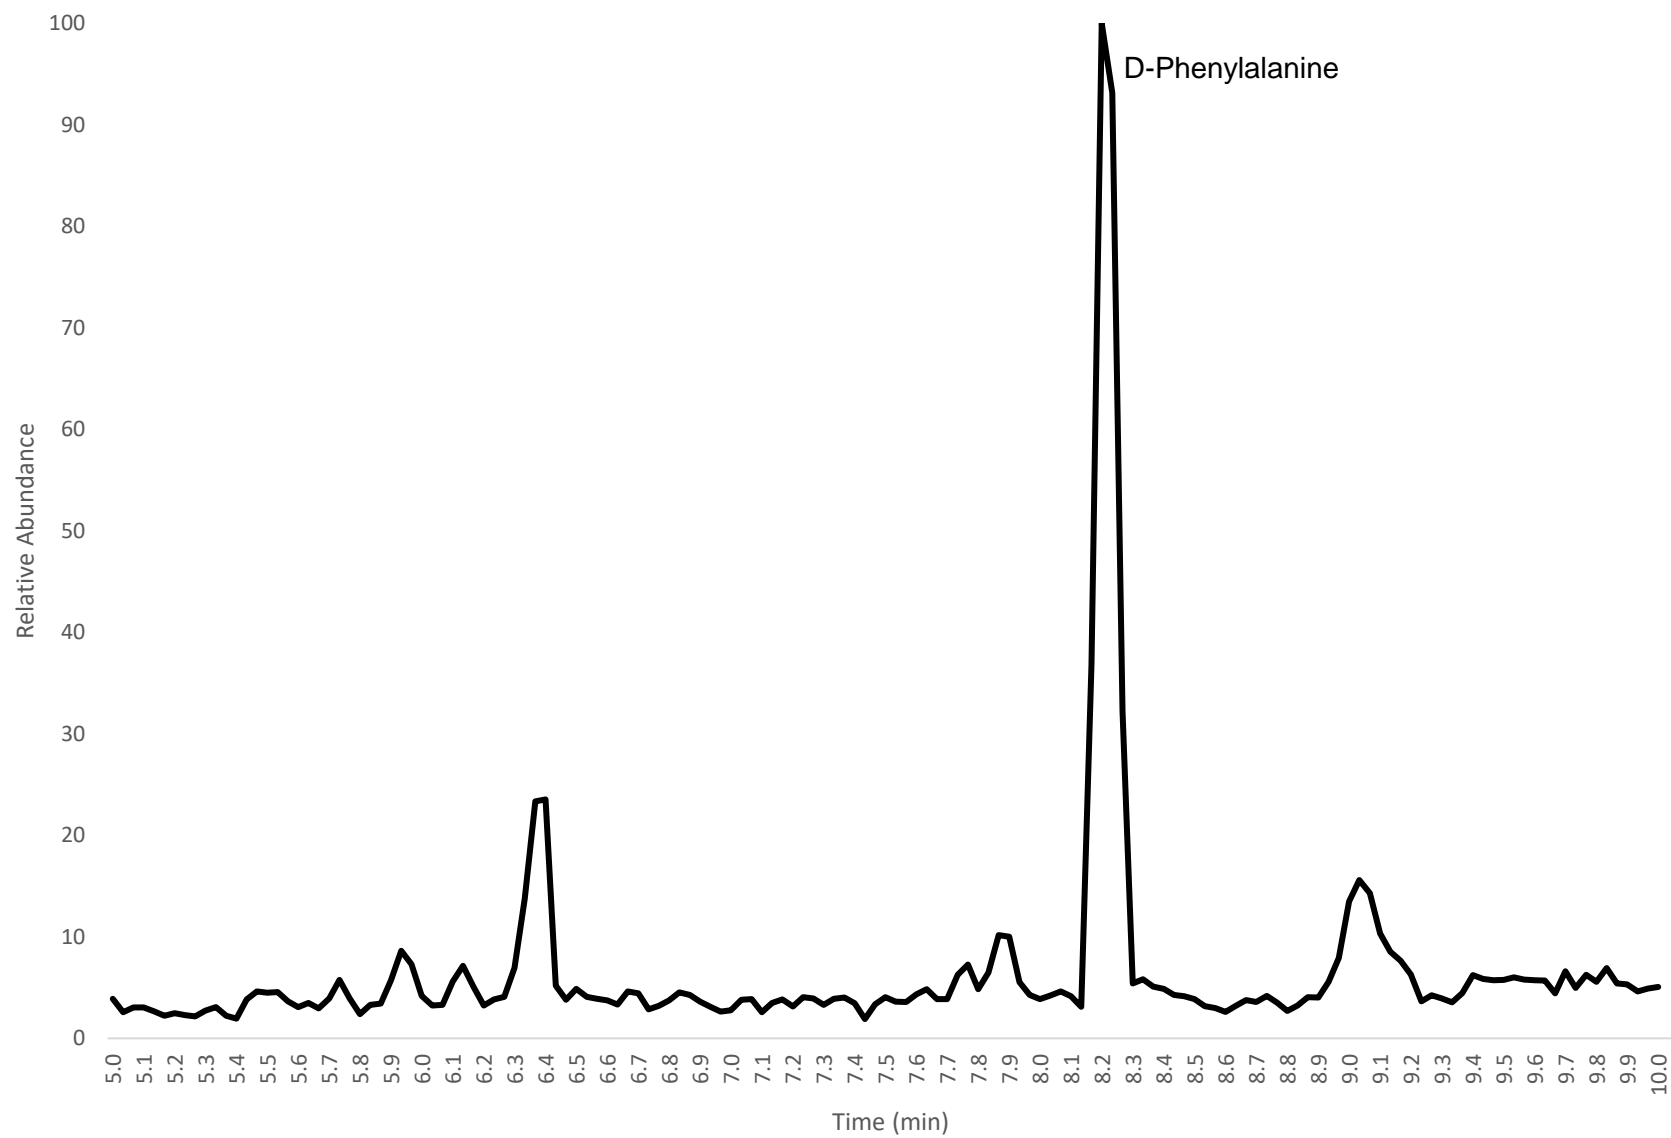

Figure 32. Selected ion trace for  $m/z$  713-717 for serrawettin W4 (3) after FDAA derivatization.

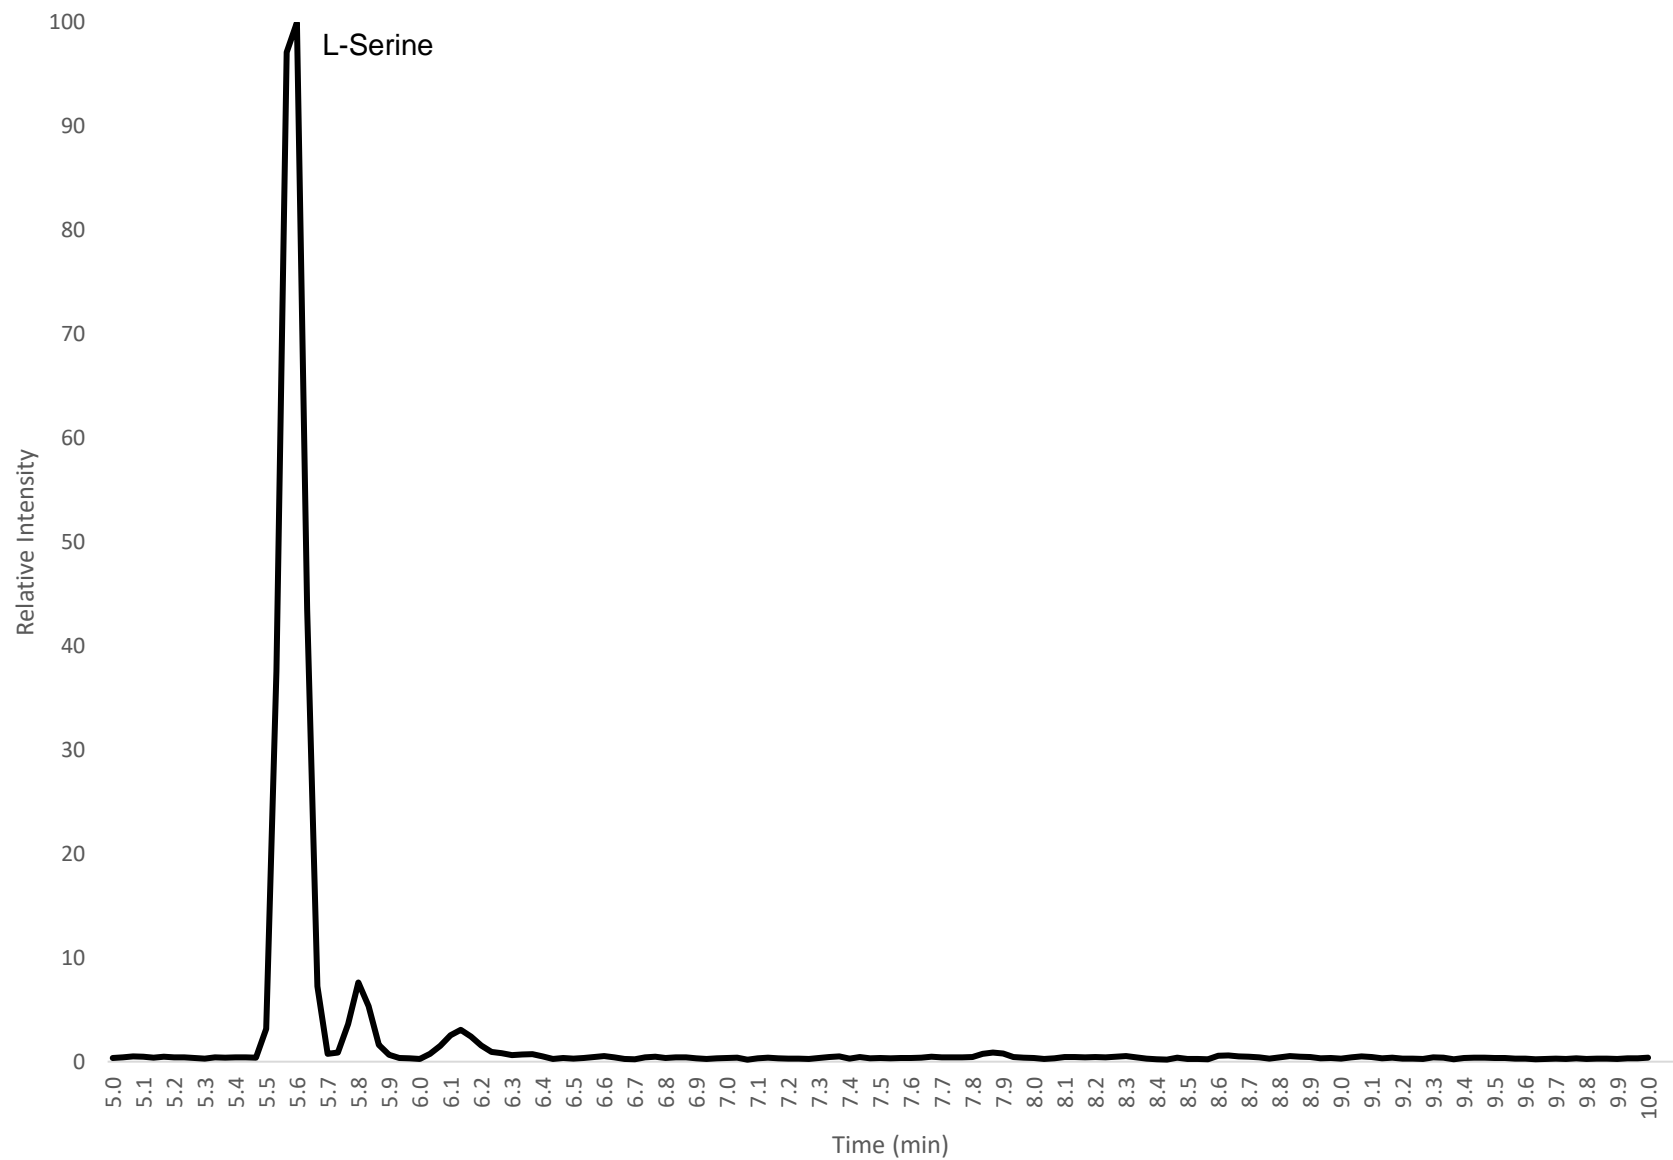



**Figure 33. Selected ion trace for  $m/z$  737-740 for serrawettin W4 (3) after FDAA derivatization.**

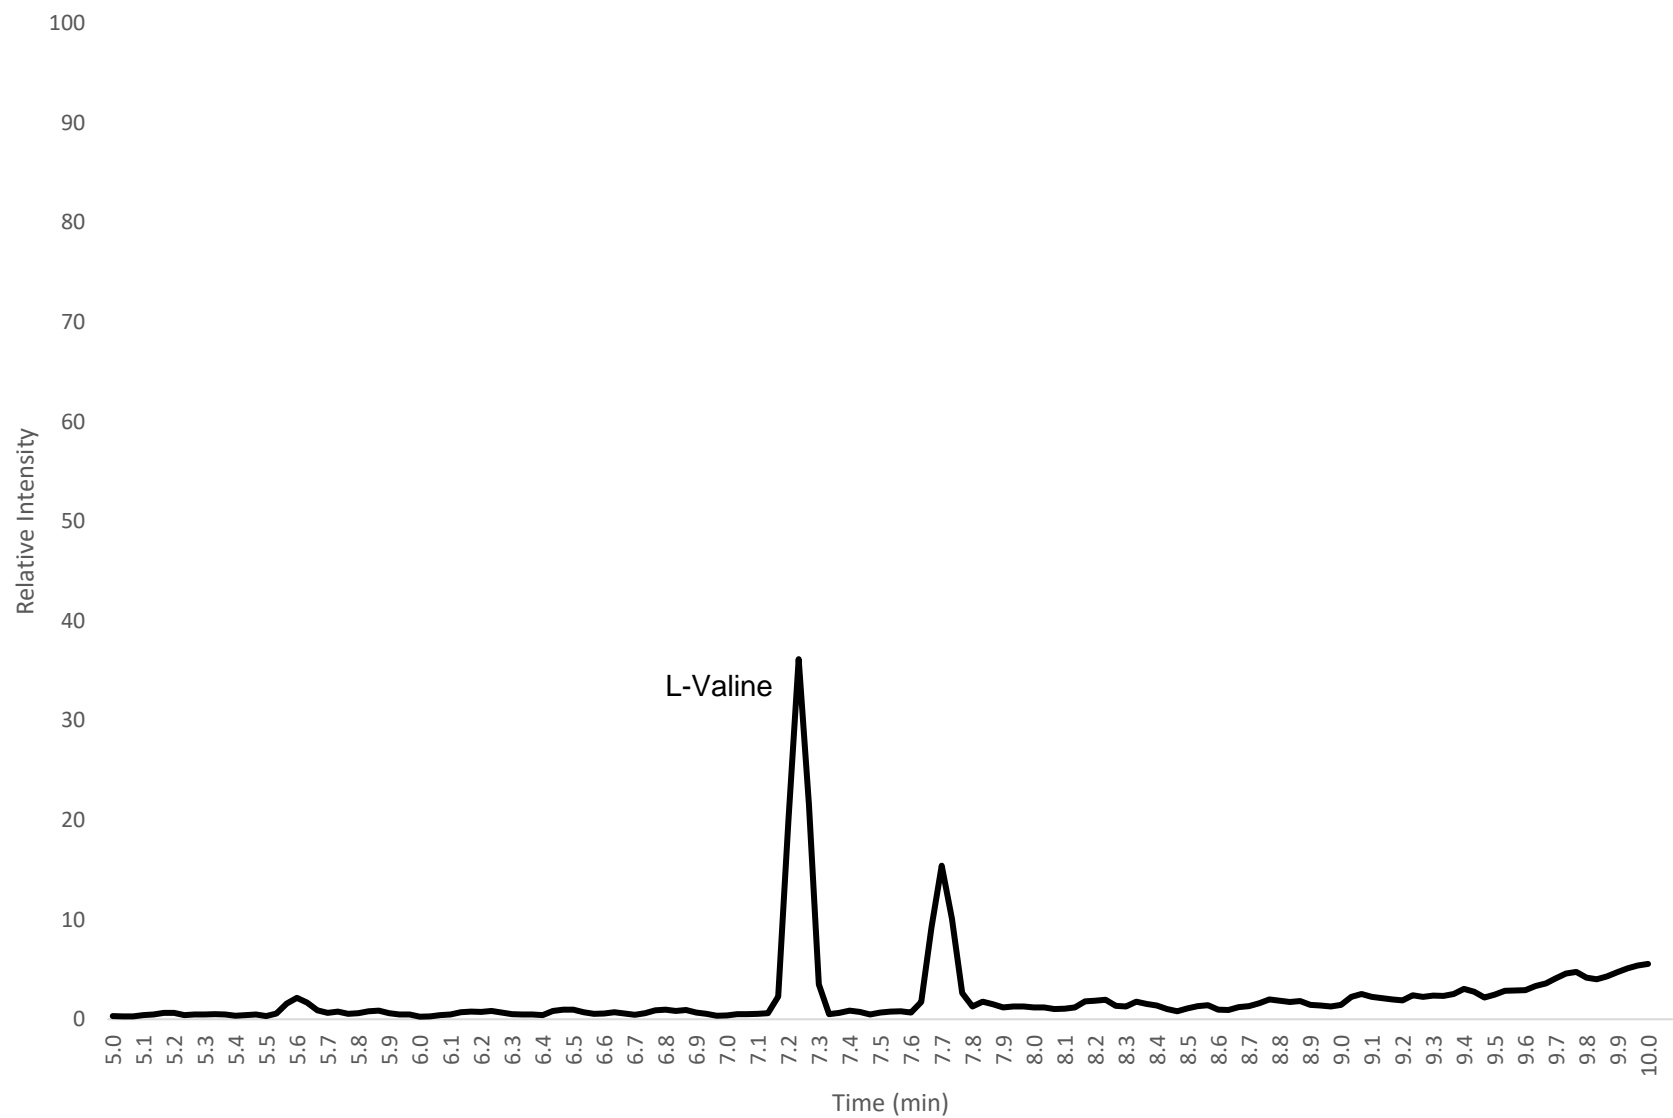

**Figure 34. Selected ion trace for  $m/z$  741-745 for serrawettin W4 (3) after FDAA derivatization.**

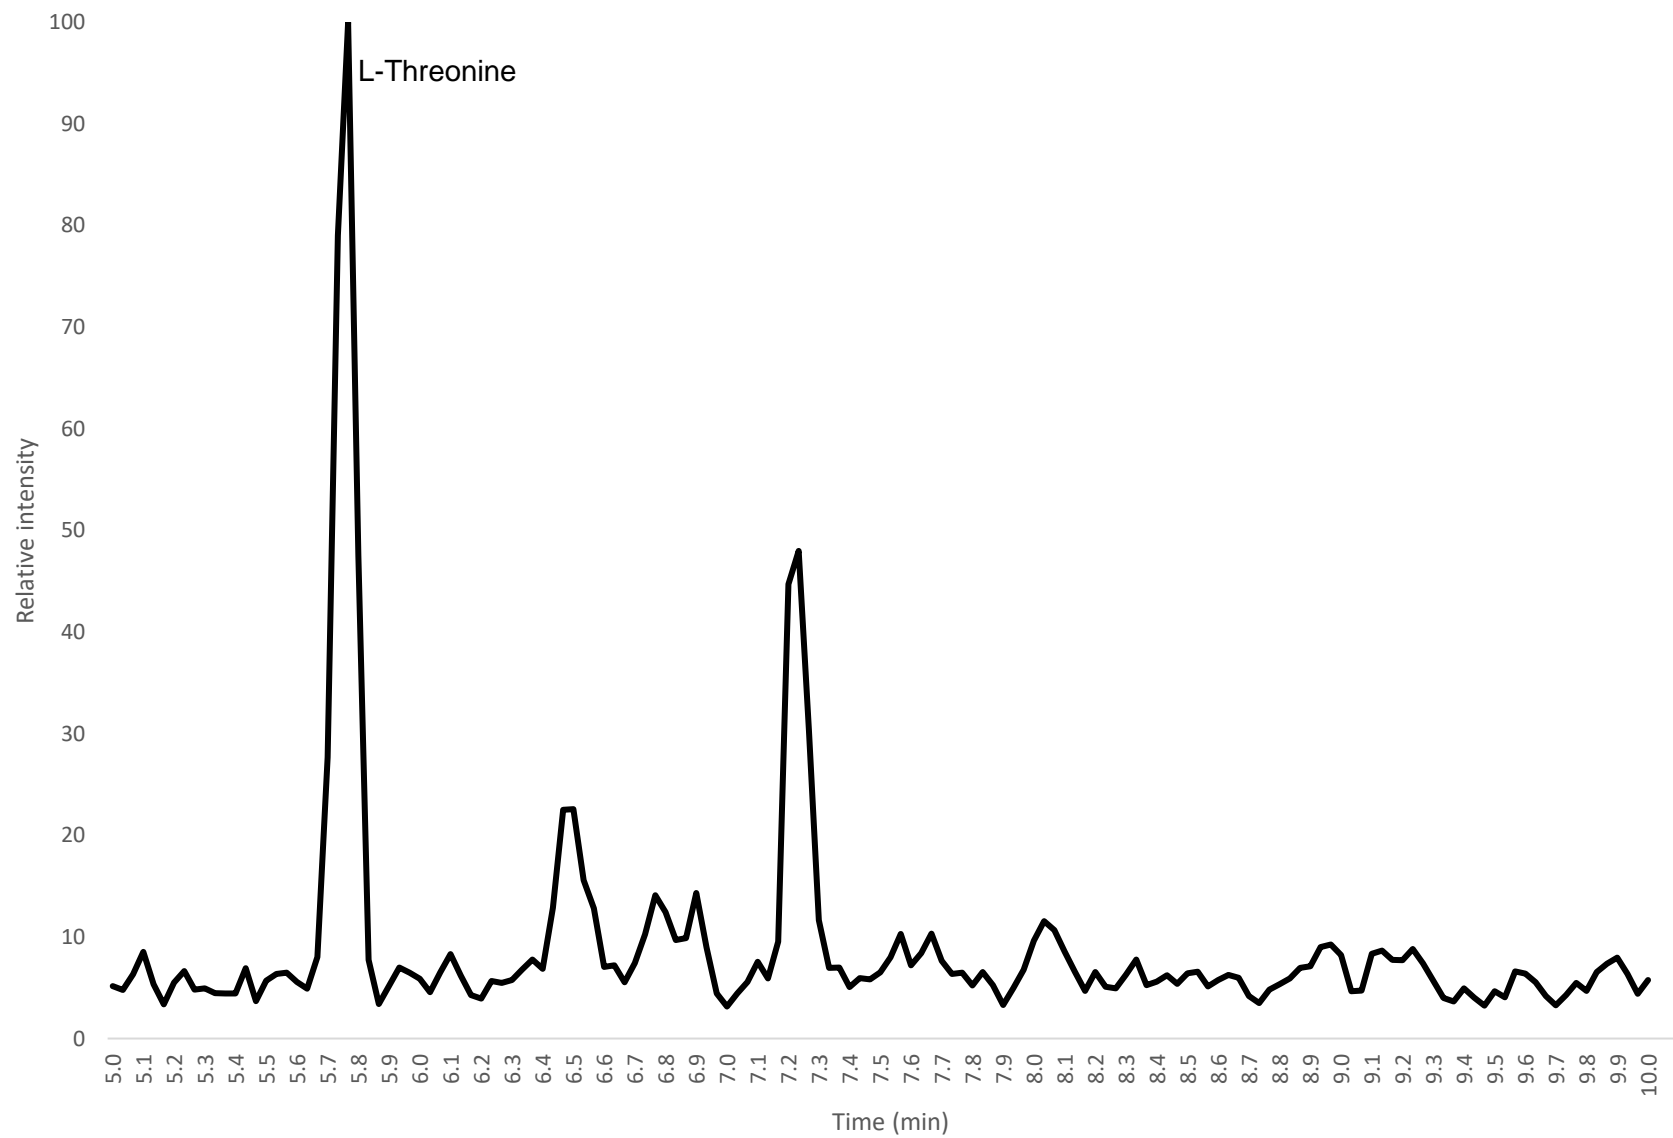

**Figure 35. Selected ion trace for  $m/z$  765-769 for serrawettin W4 (3) after FDAA derivatization.**

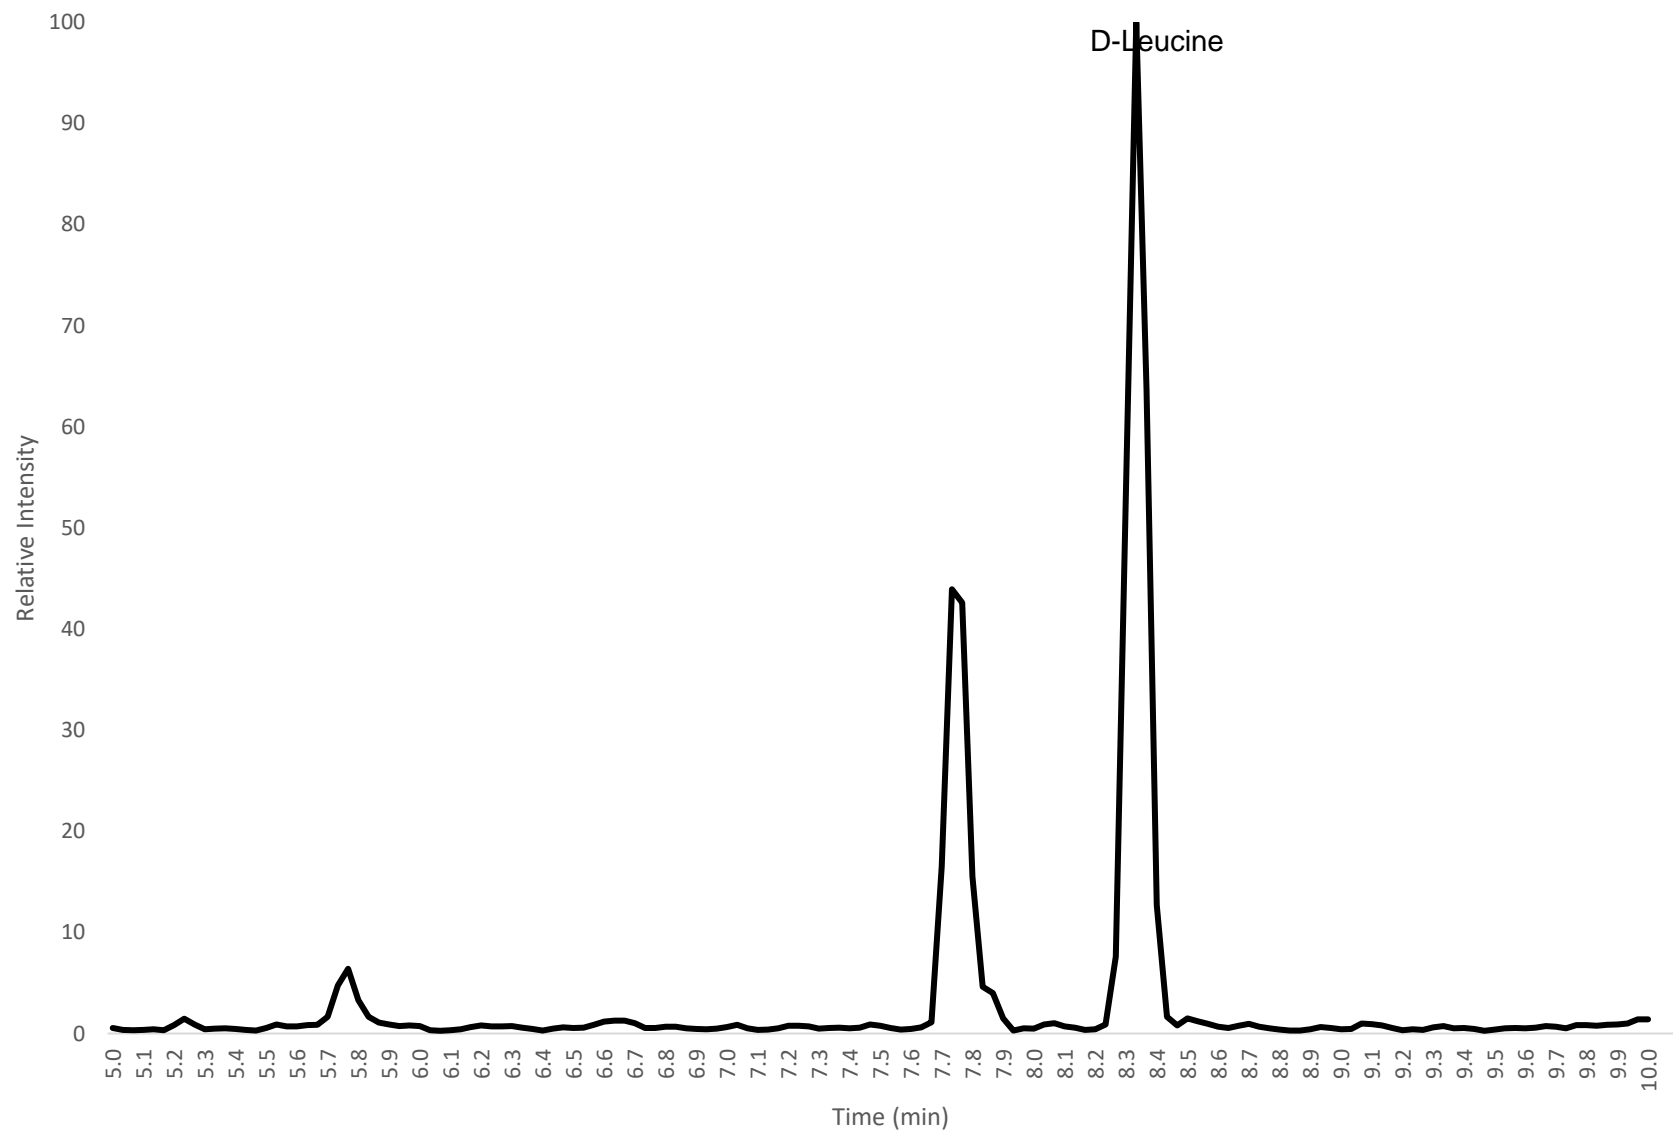

**Figure 36. Selected ion trace for  $m/z$  833-837 for serrawettin W4 (3) after FDAA derivatization.**

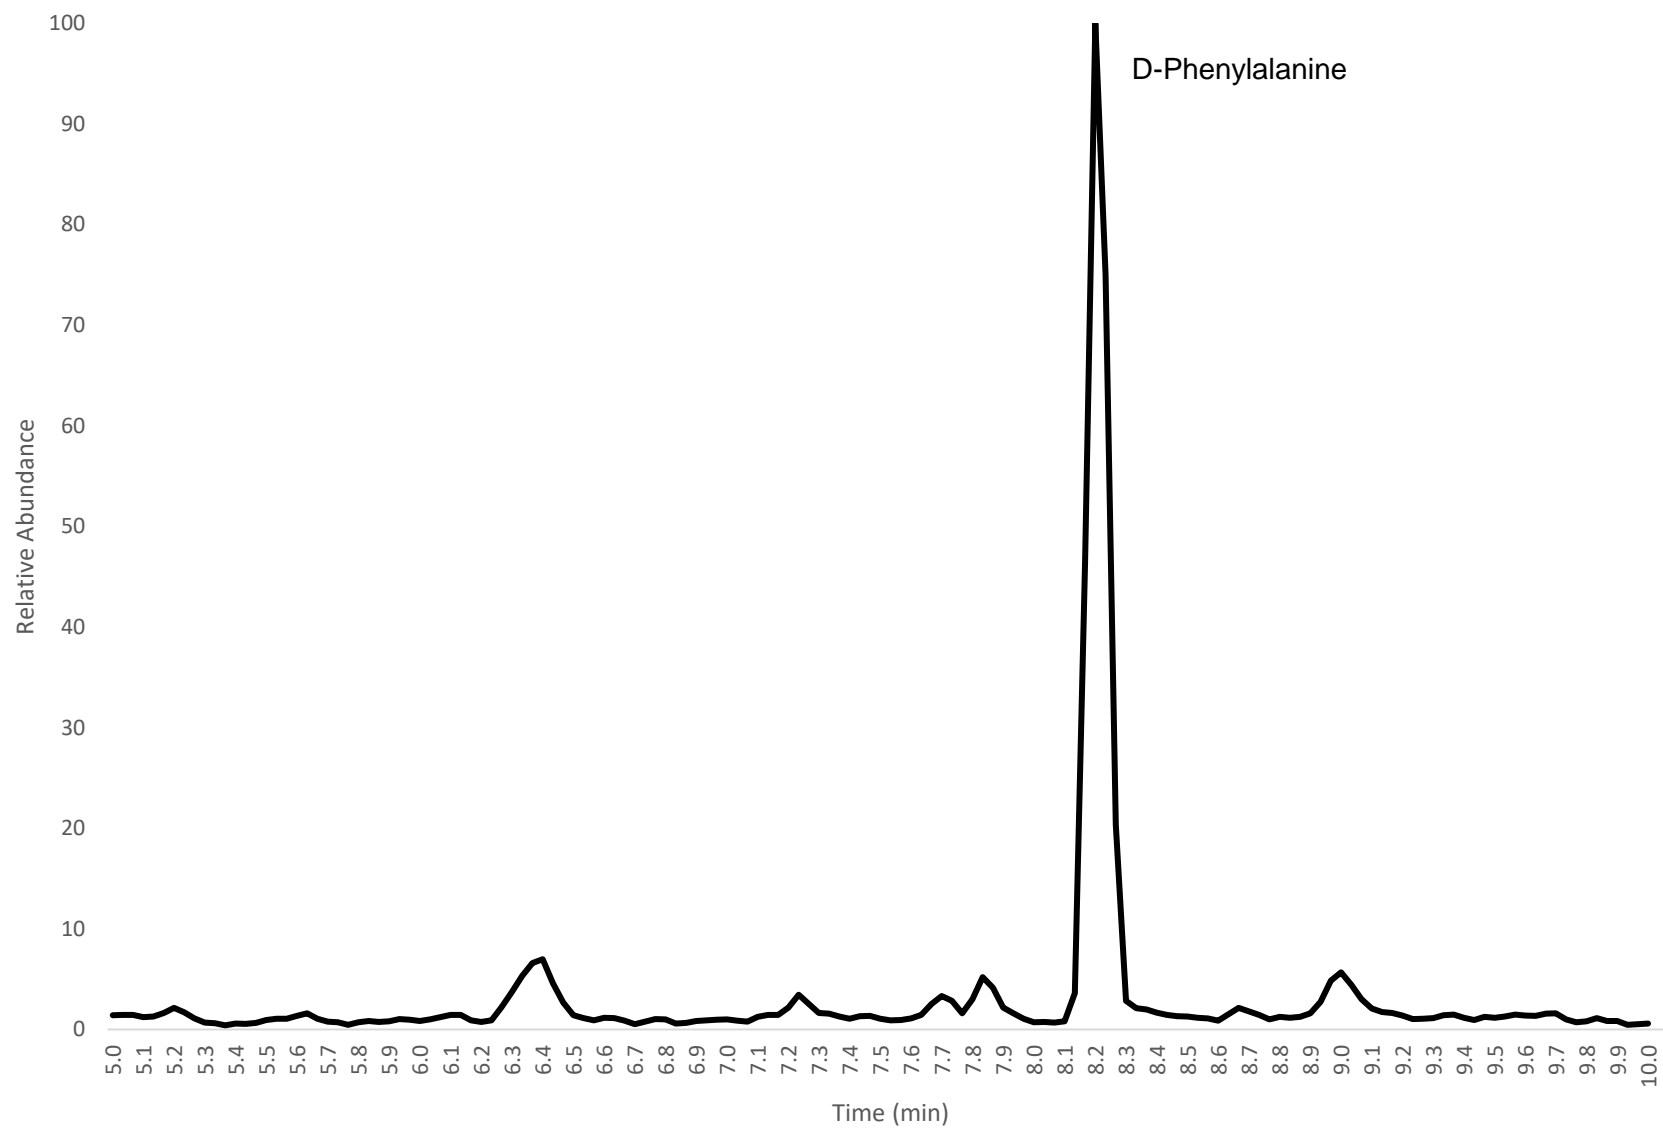

**Figure 37. Selected ion trace for  $m/z$  765-769 for serrawettin W5 (4) after FDAA derivatization.**

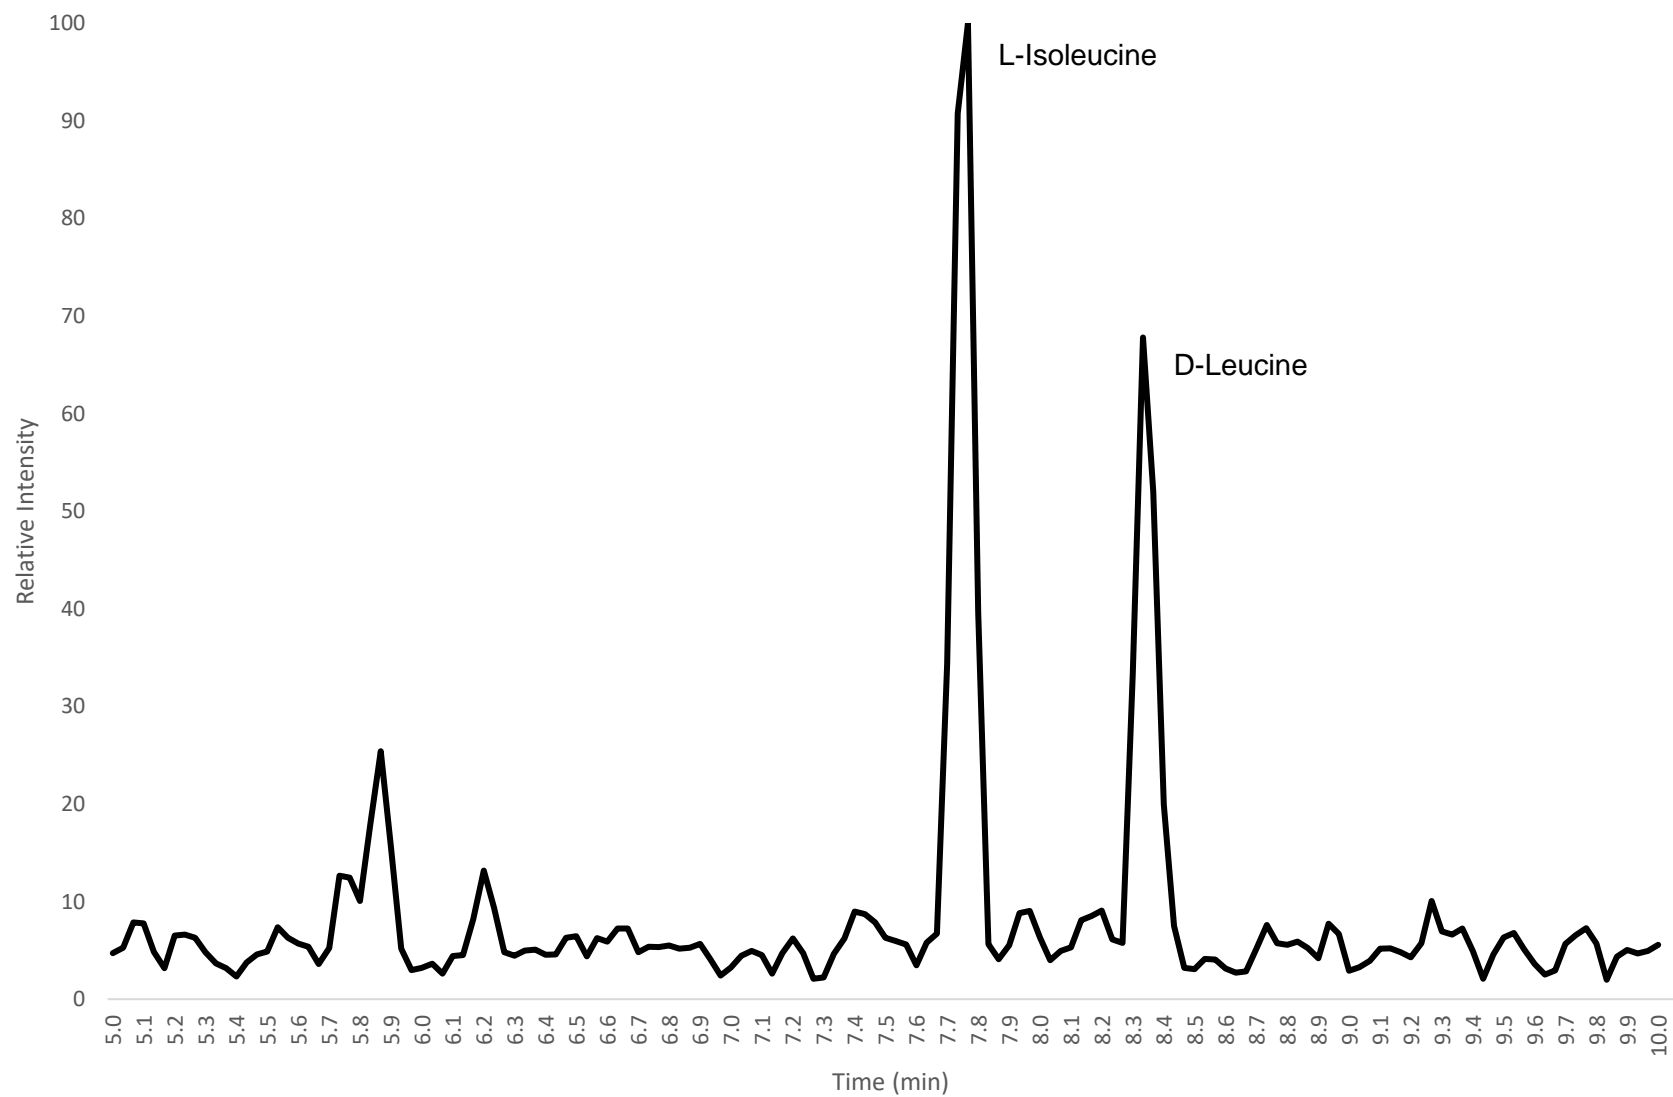

**Figure 38. Selected ion trace for  $m/z$  741-745 for serrawettin W5 (4) after FDAA derivatization.**

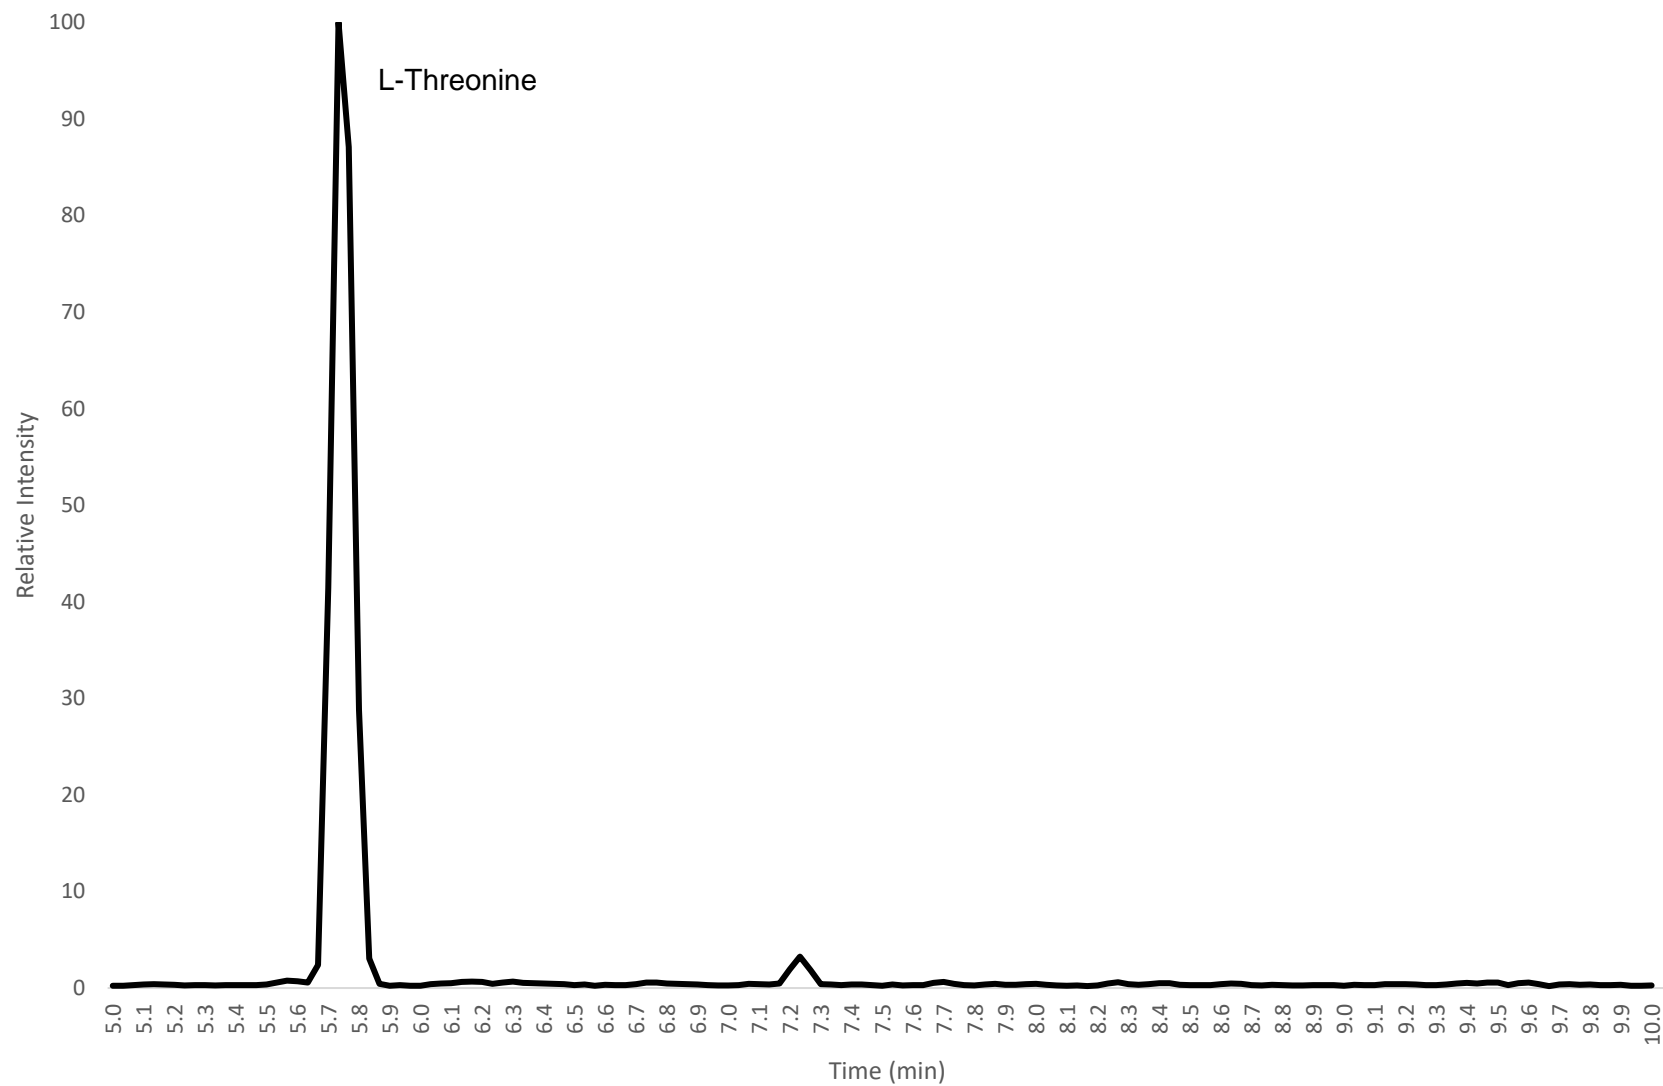

**Figure 39. Selected ion trace for  $m/z$  833-837 for serrawettin W5 (4) after FDAA derivatization.**

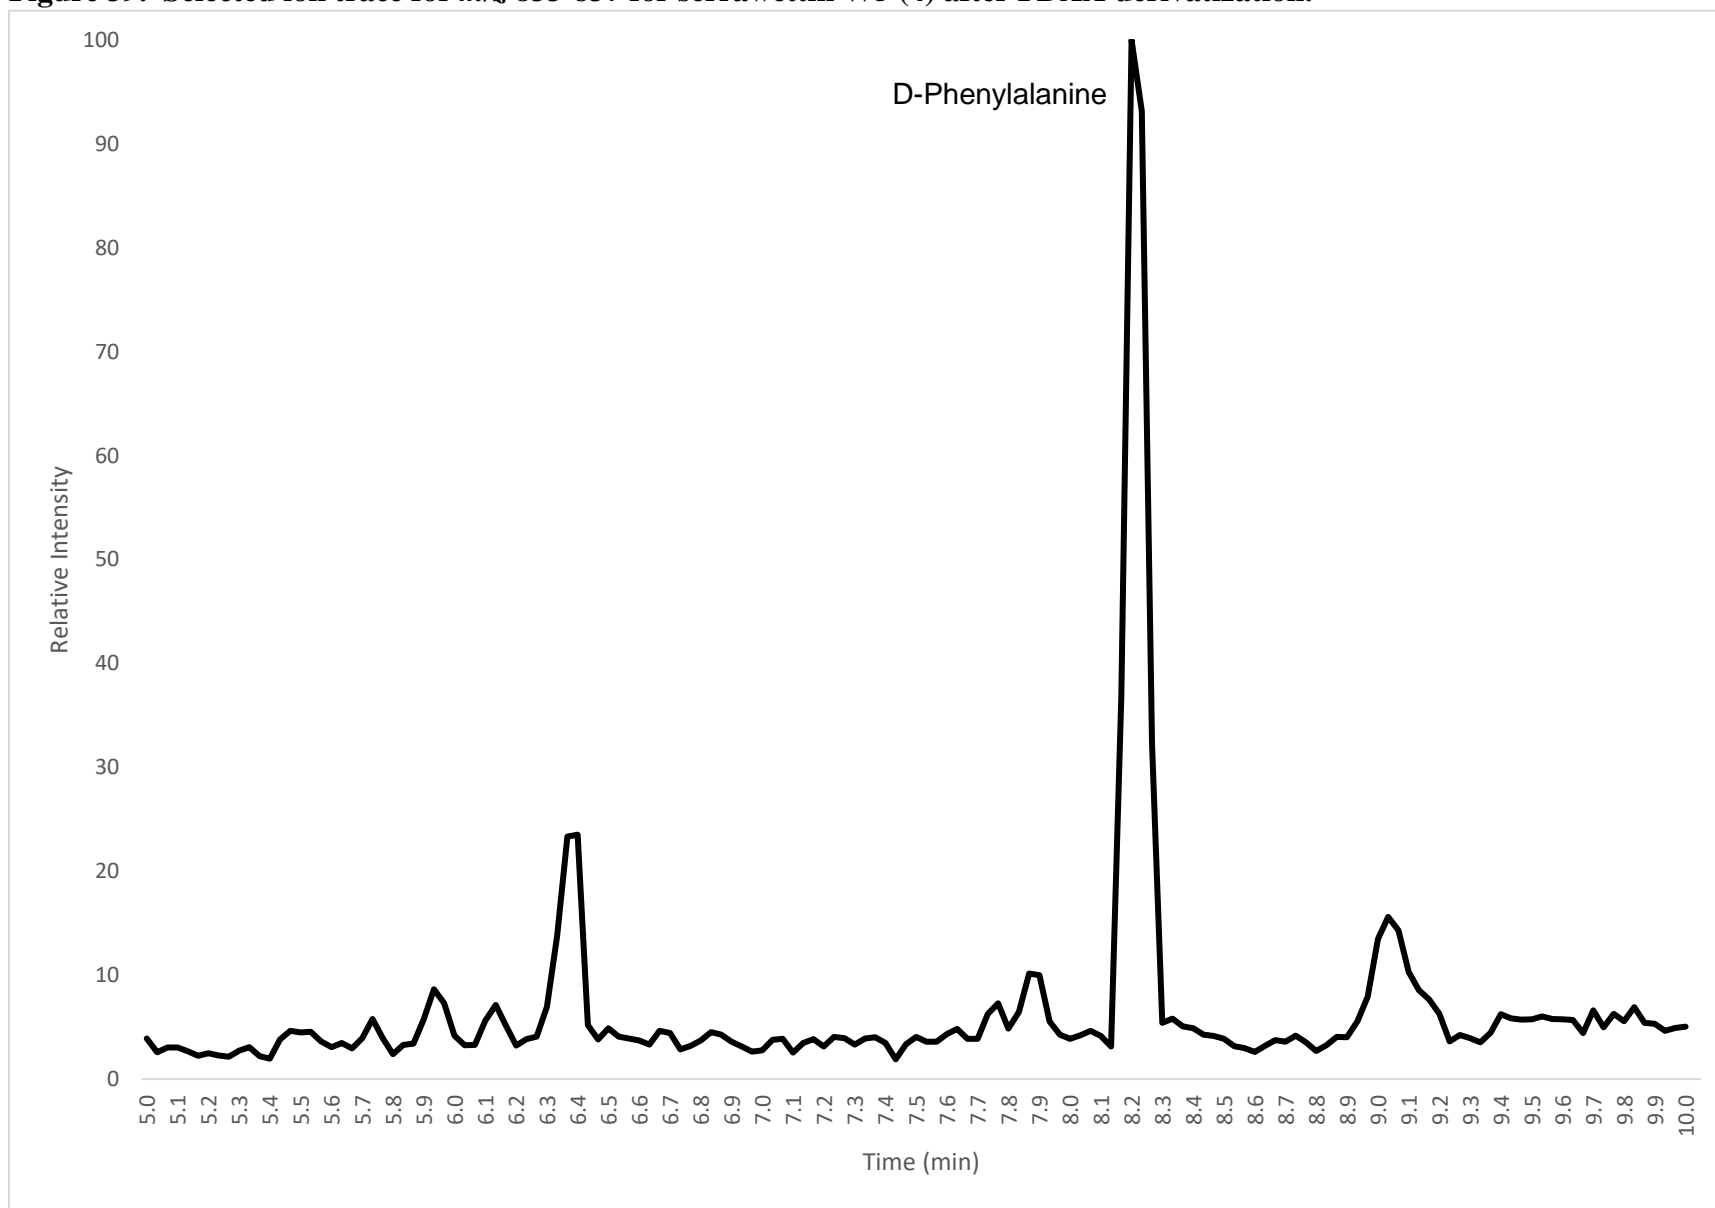

**Figure 40. Selected ion trace for  $m/z$  713-717 after serrawettin W5 (4) after FDAA derivatization.**

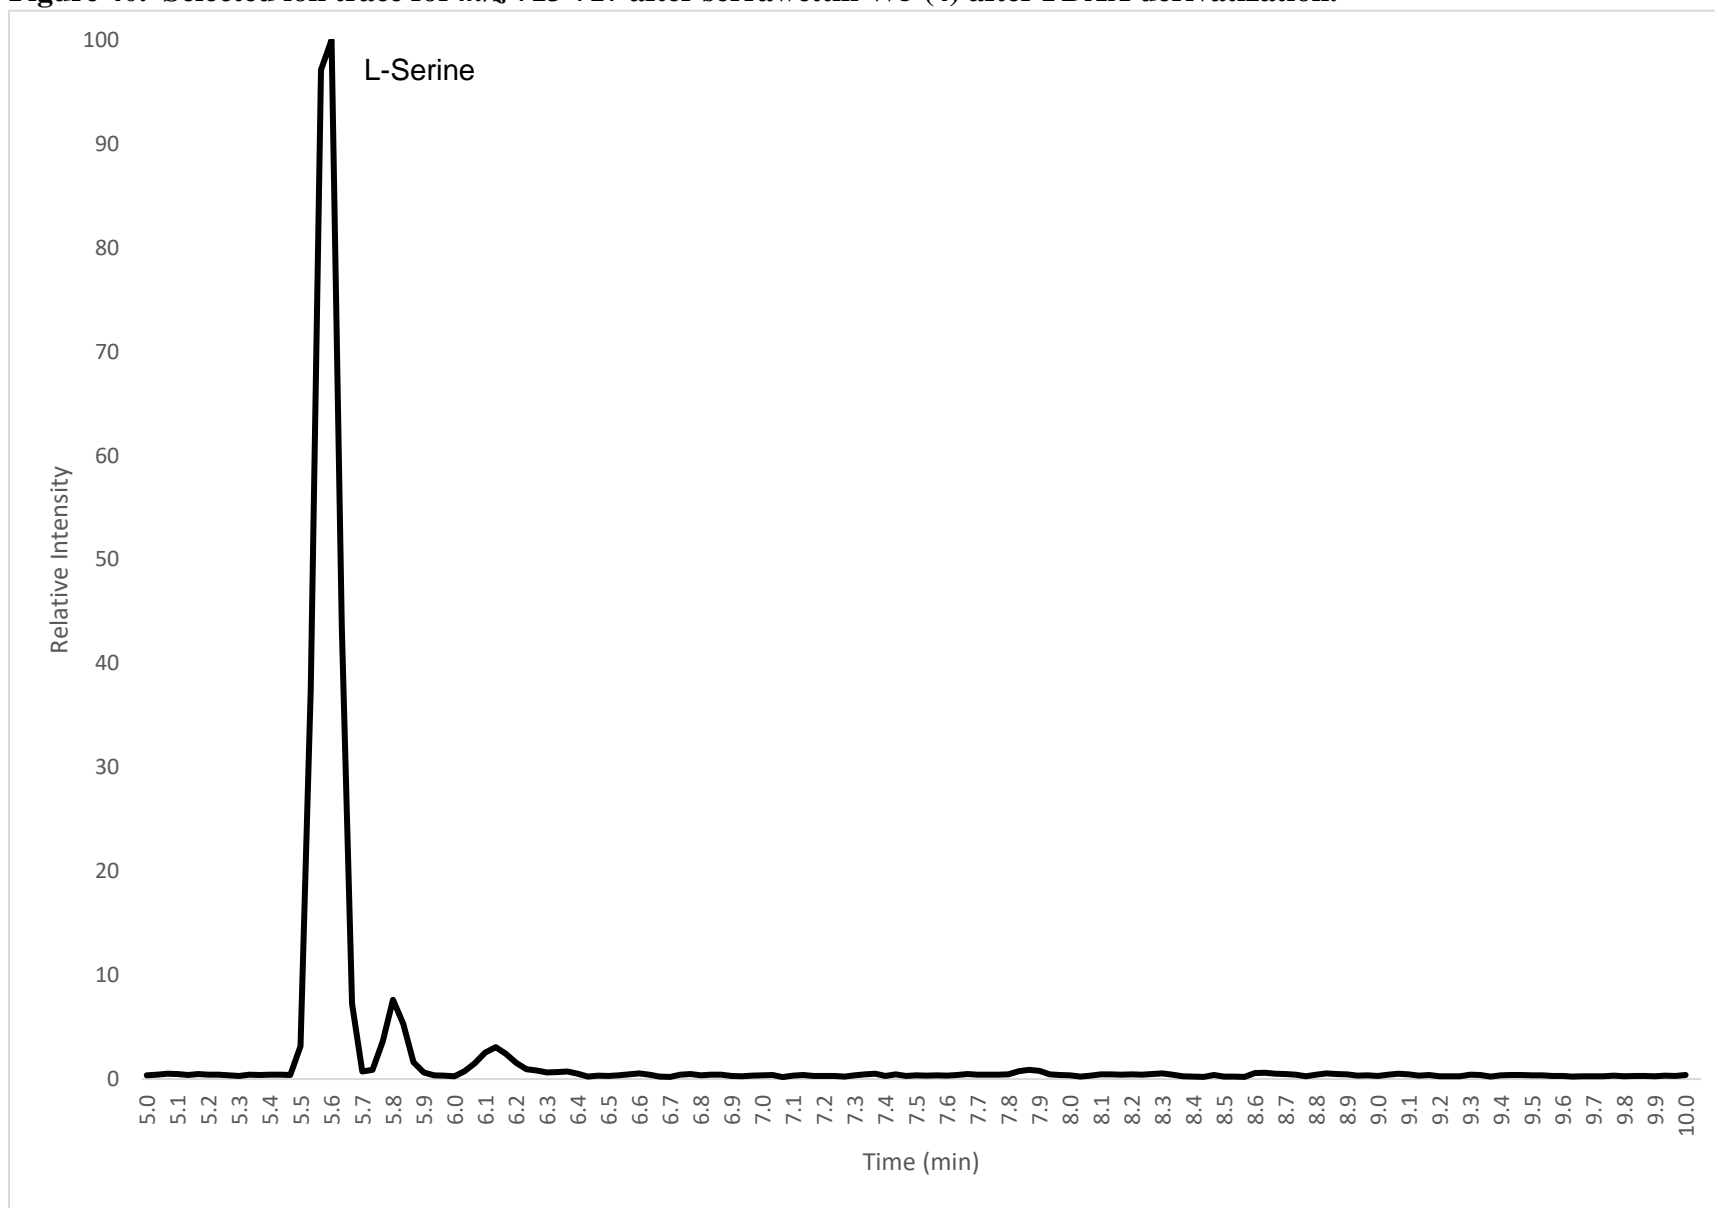



**Figure 41. Selected ion trace for  $m/z$  741-745 for serrawettin W6 (5) after FDAA derivatization.**

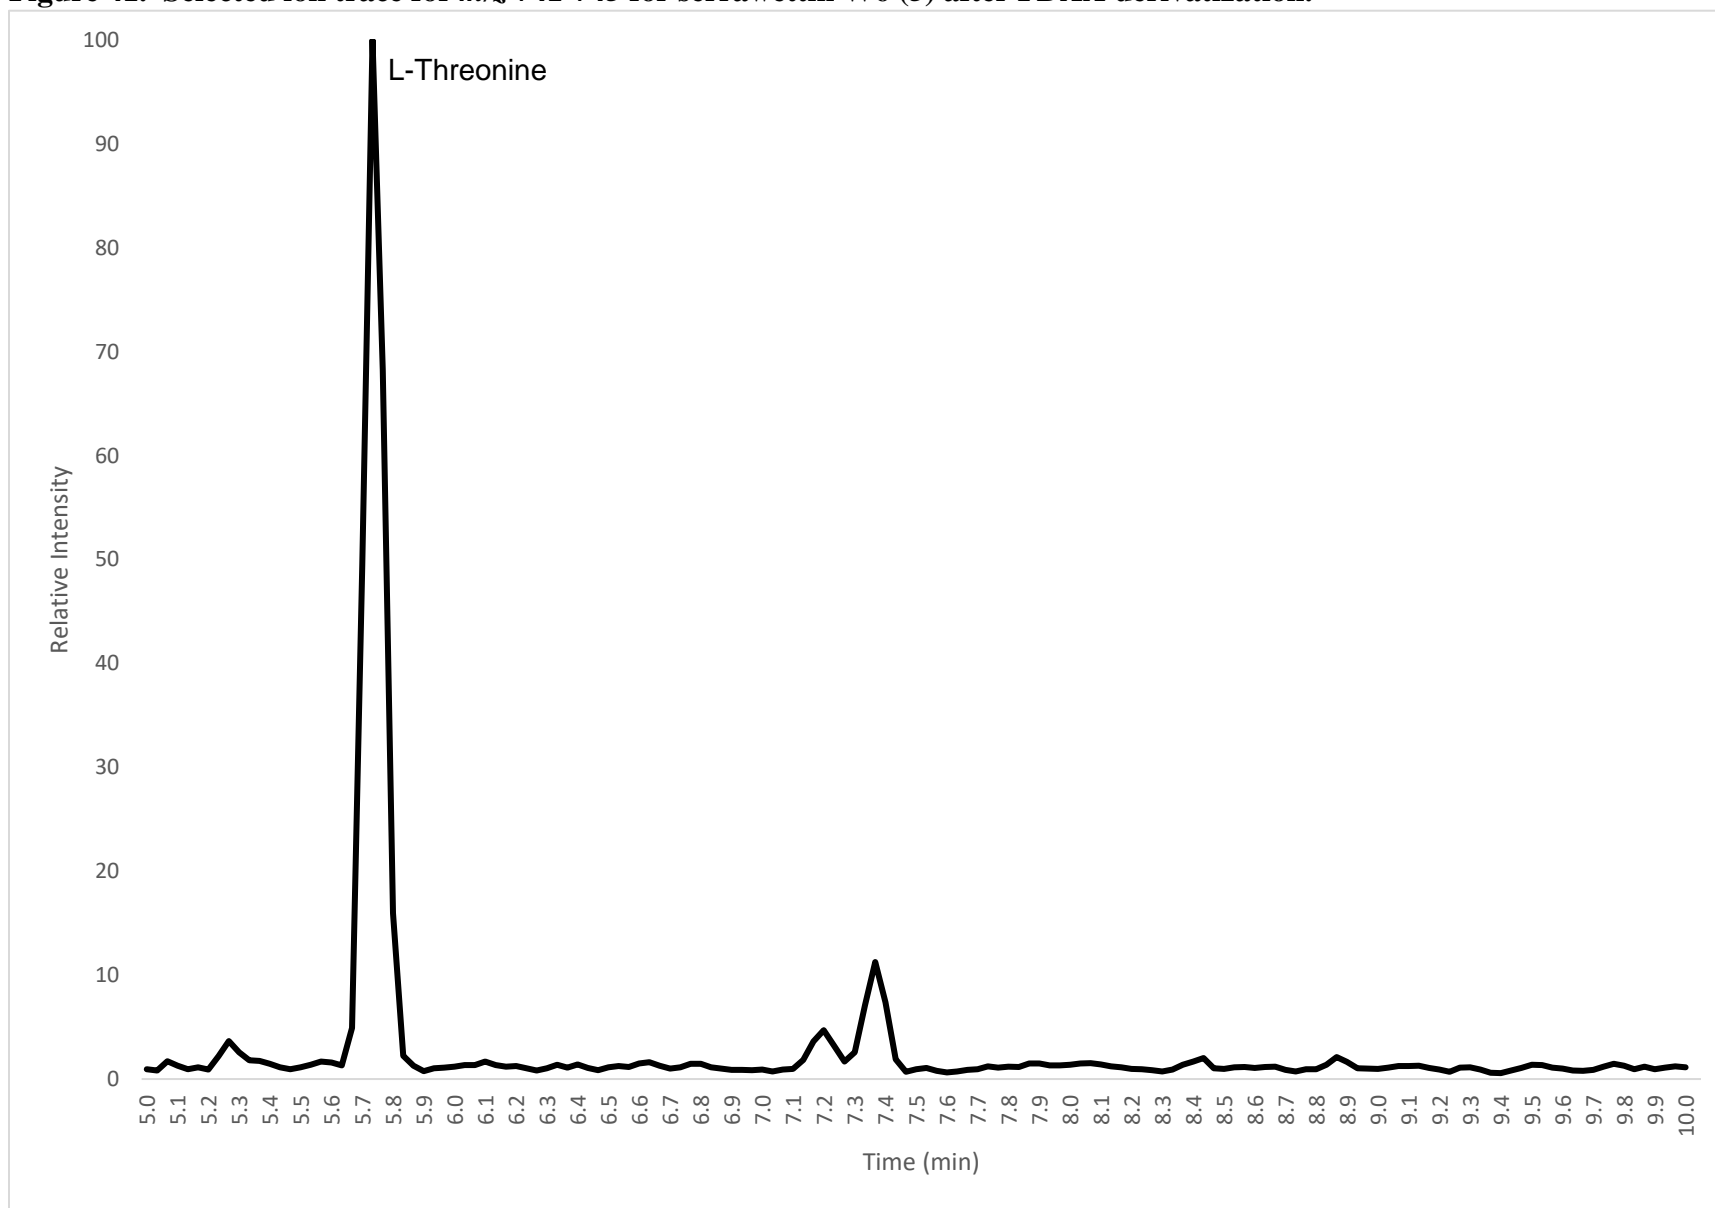

**Figure 42. Selected ion trace for  $m/z$  684-688 for serrawettin W6 (5) after FDAA derivatization.**

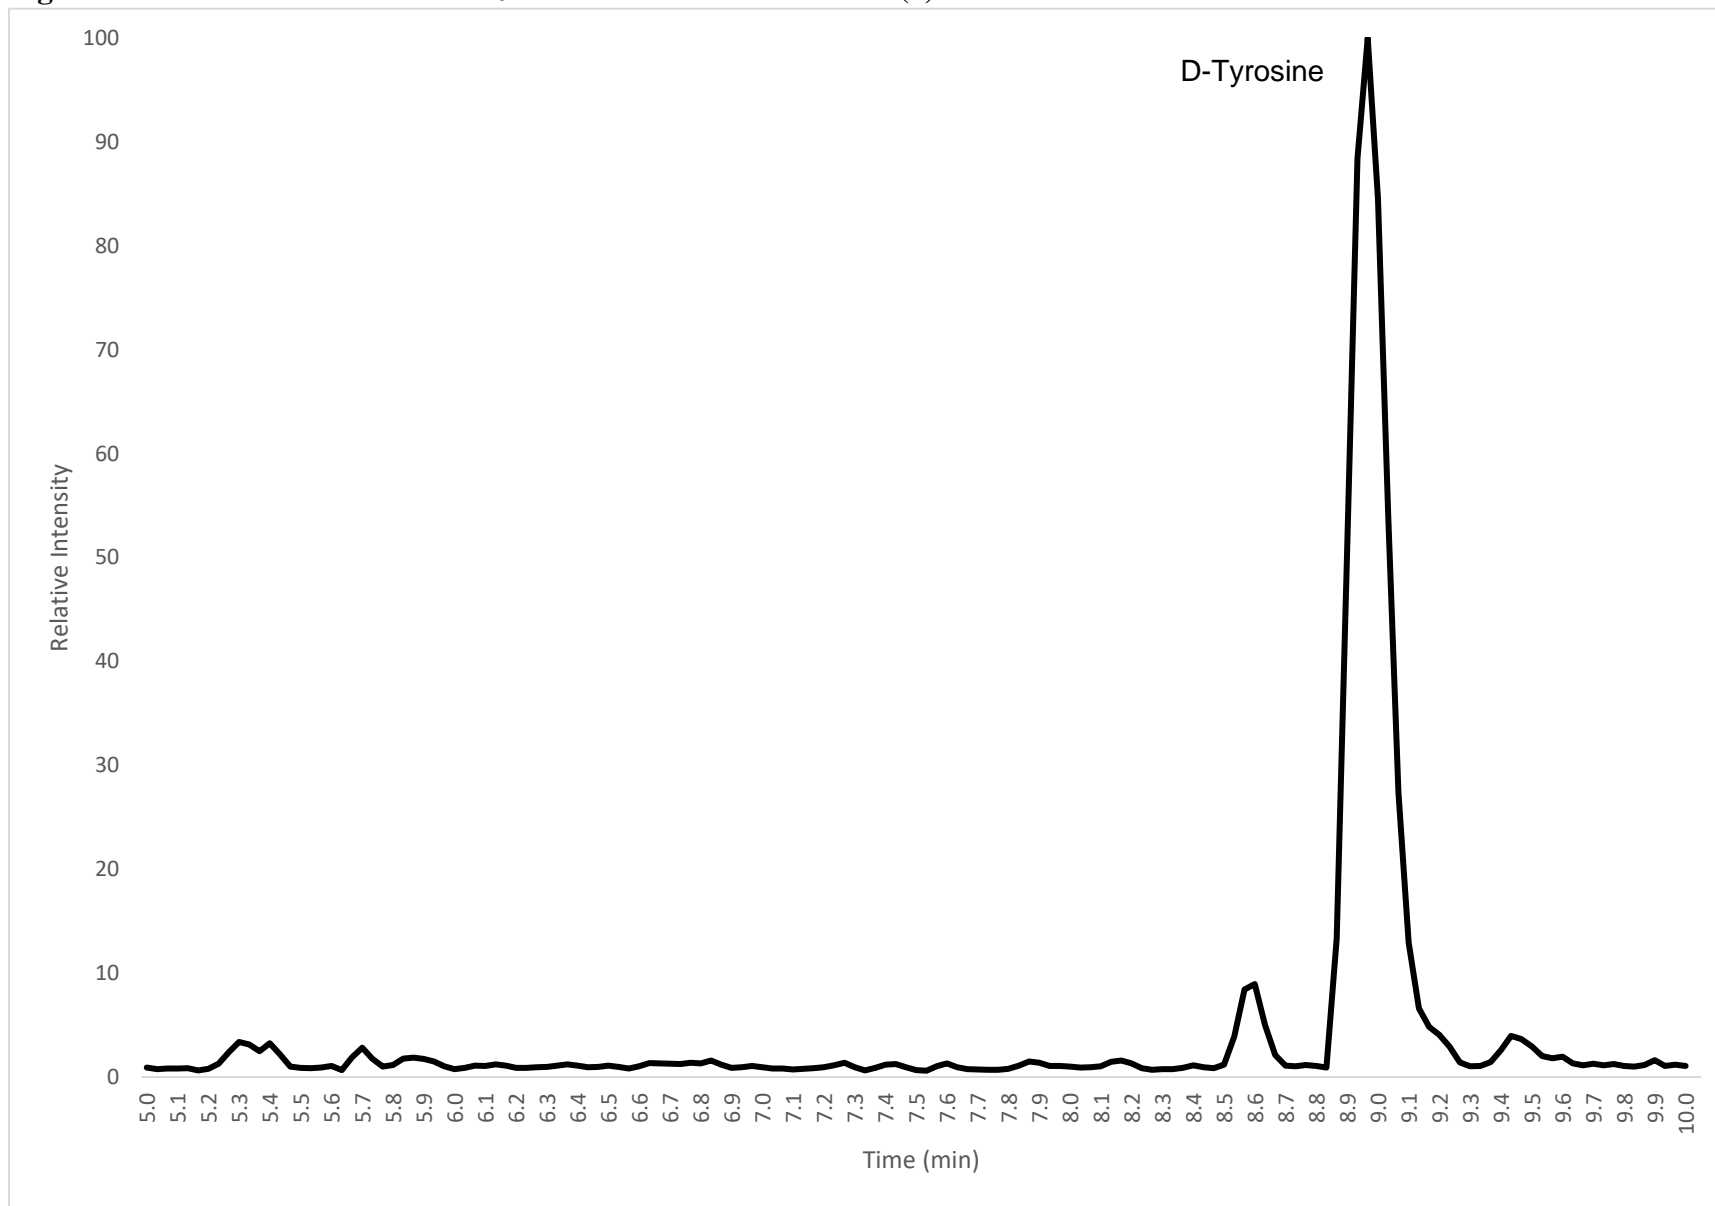

**Figure 43. Selected ion trace for  $m/z$  713-717 for serrawettin W6 (5) after FDAA derivatization.**

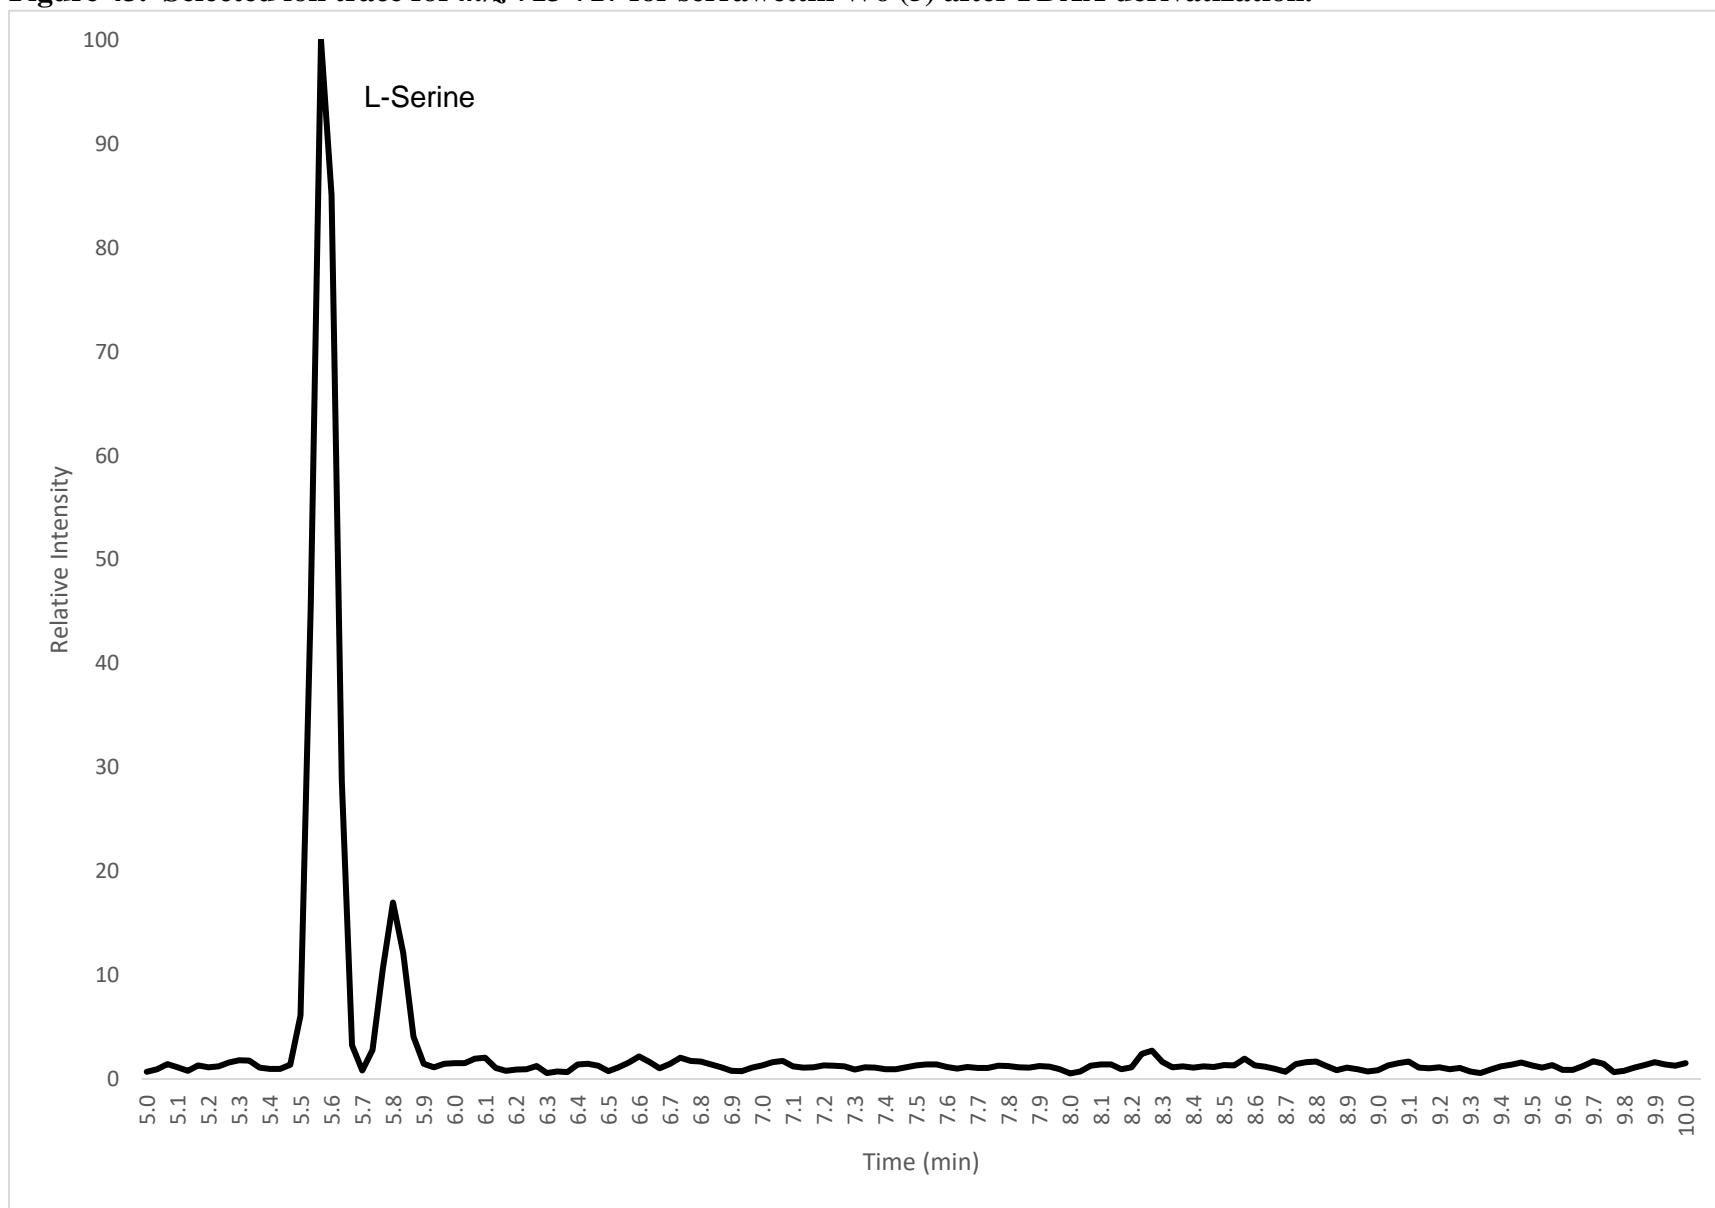

**Figure 44. Selected ion trace for  $m/z$  765-769 for serrawettin W6 (5) after FDAA derivatization.**

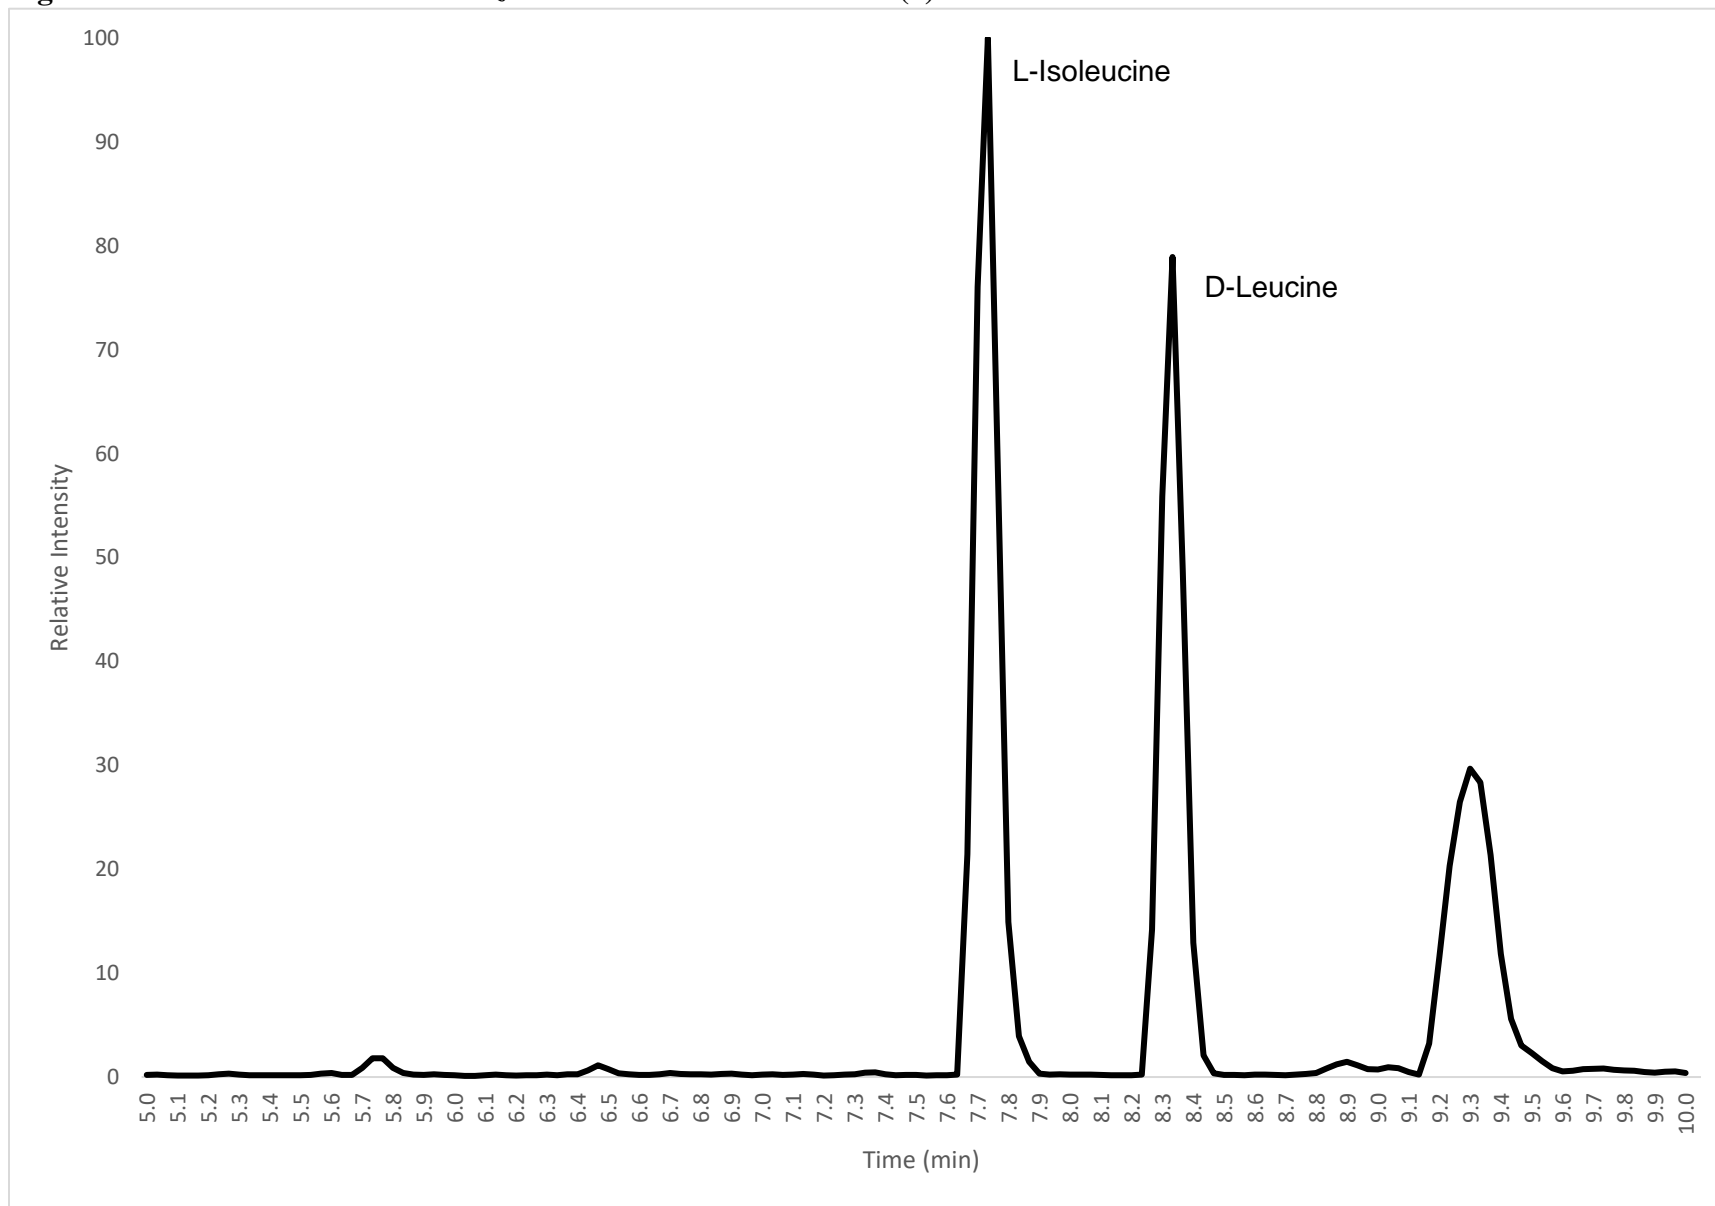

**Figure 45. Selected ion trace for  $m/z$  741-745 for FDAA derivatized D-allo threonine standard.**

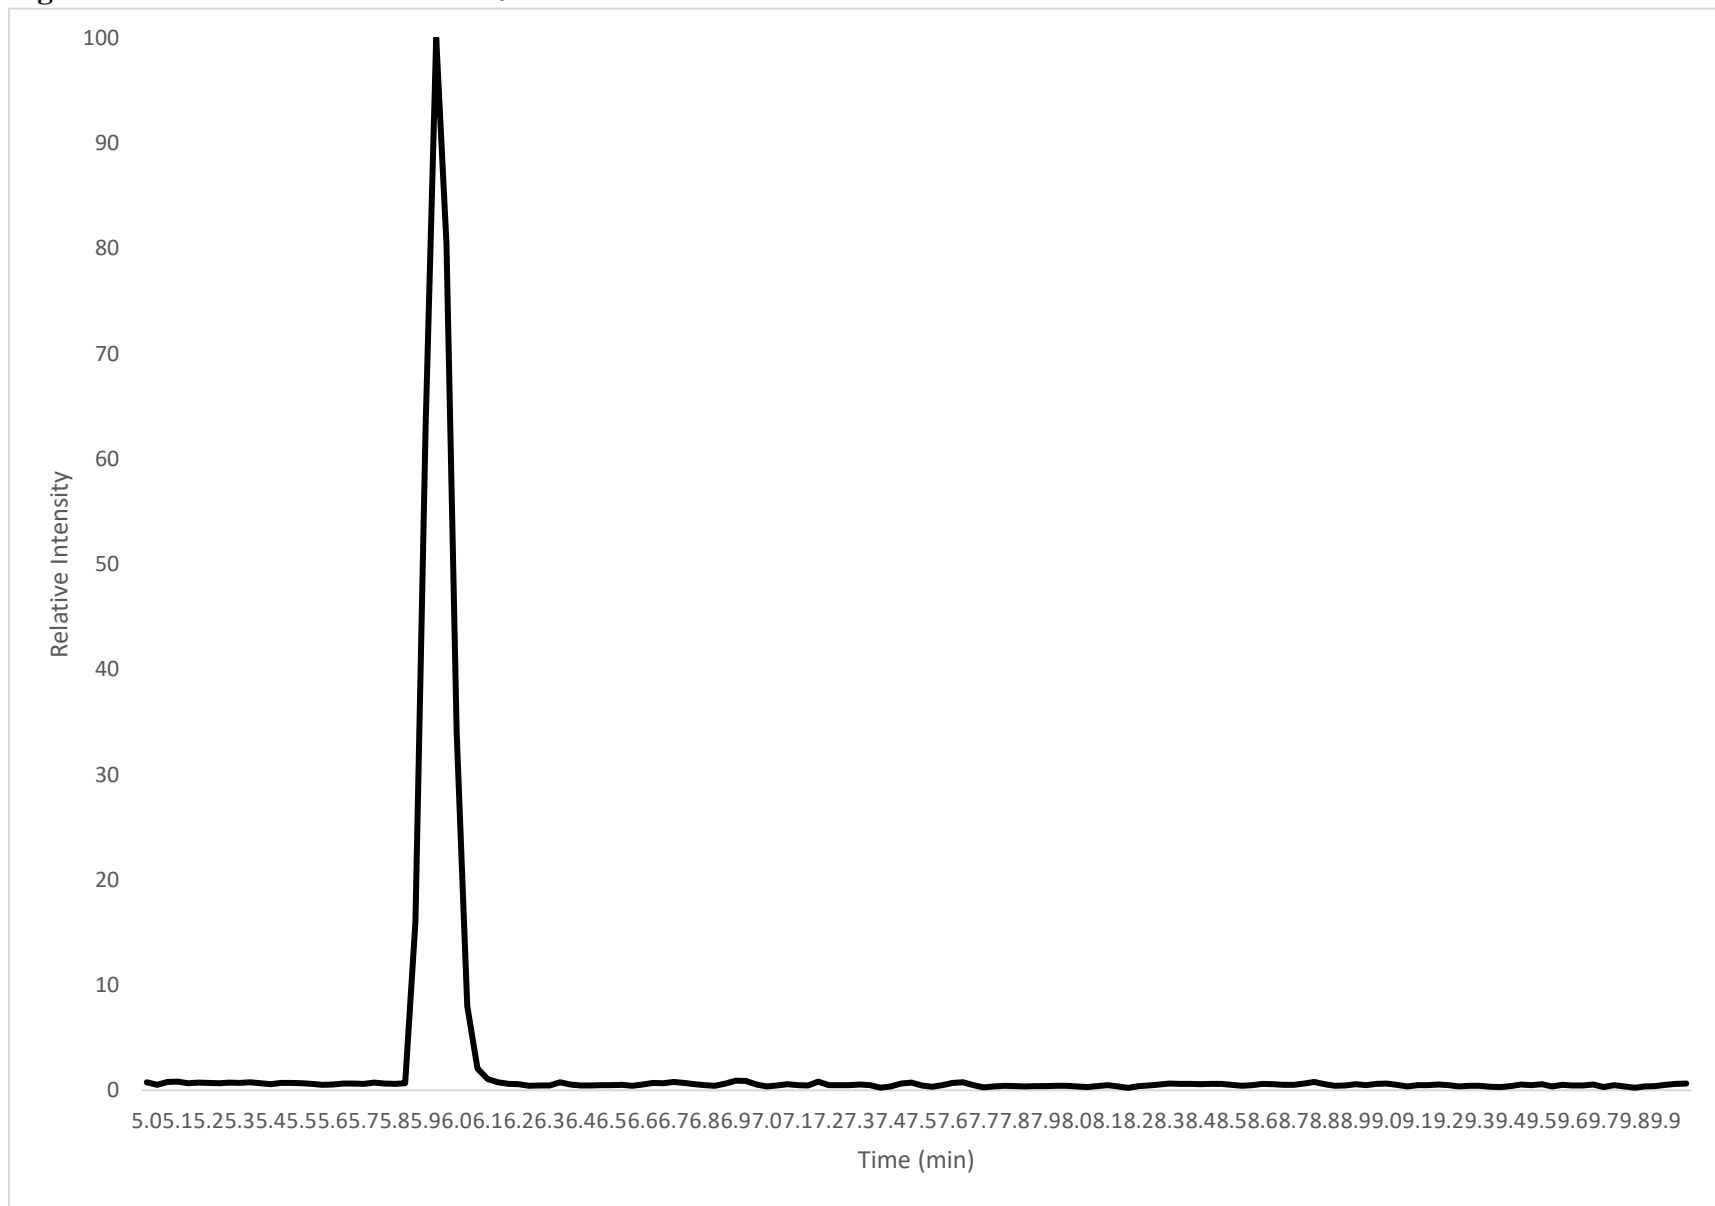

**Figure 46. Selected ion trace for  $m/z$  741-745 for FDAA derivatized L-allo threonine standard.**

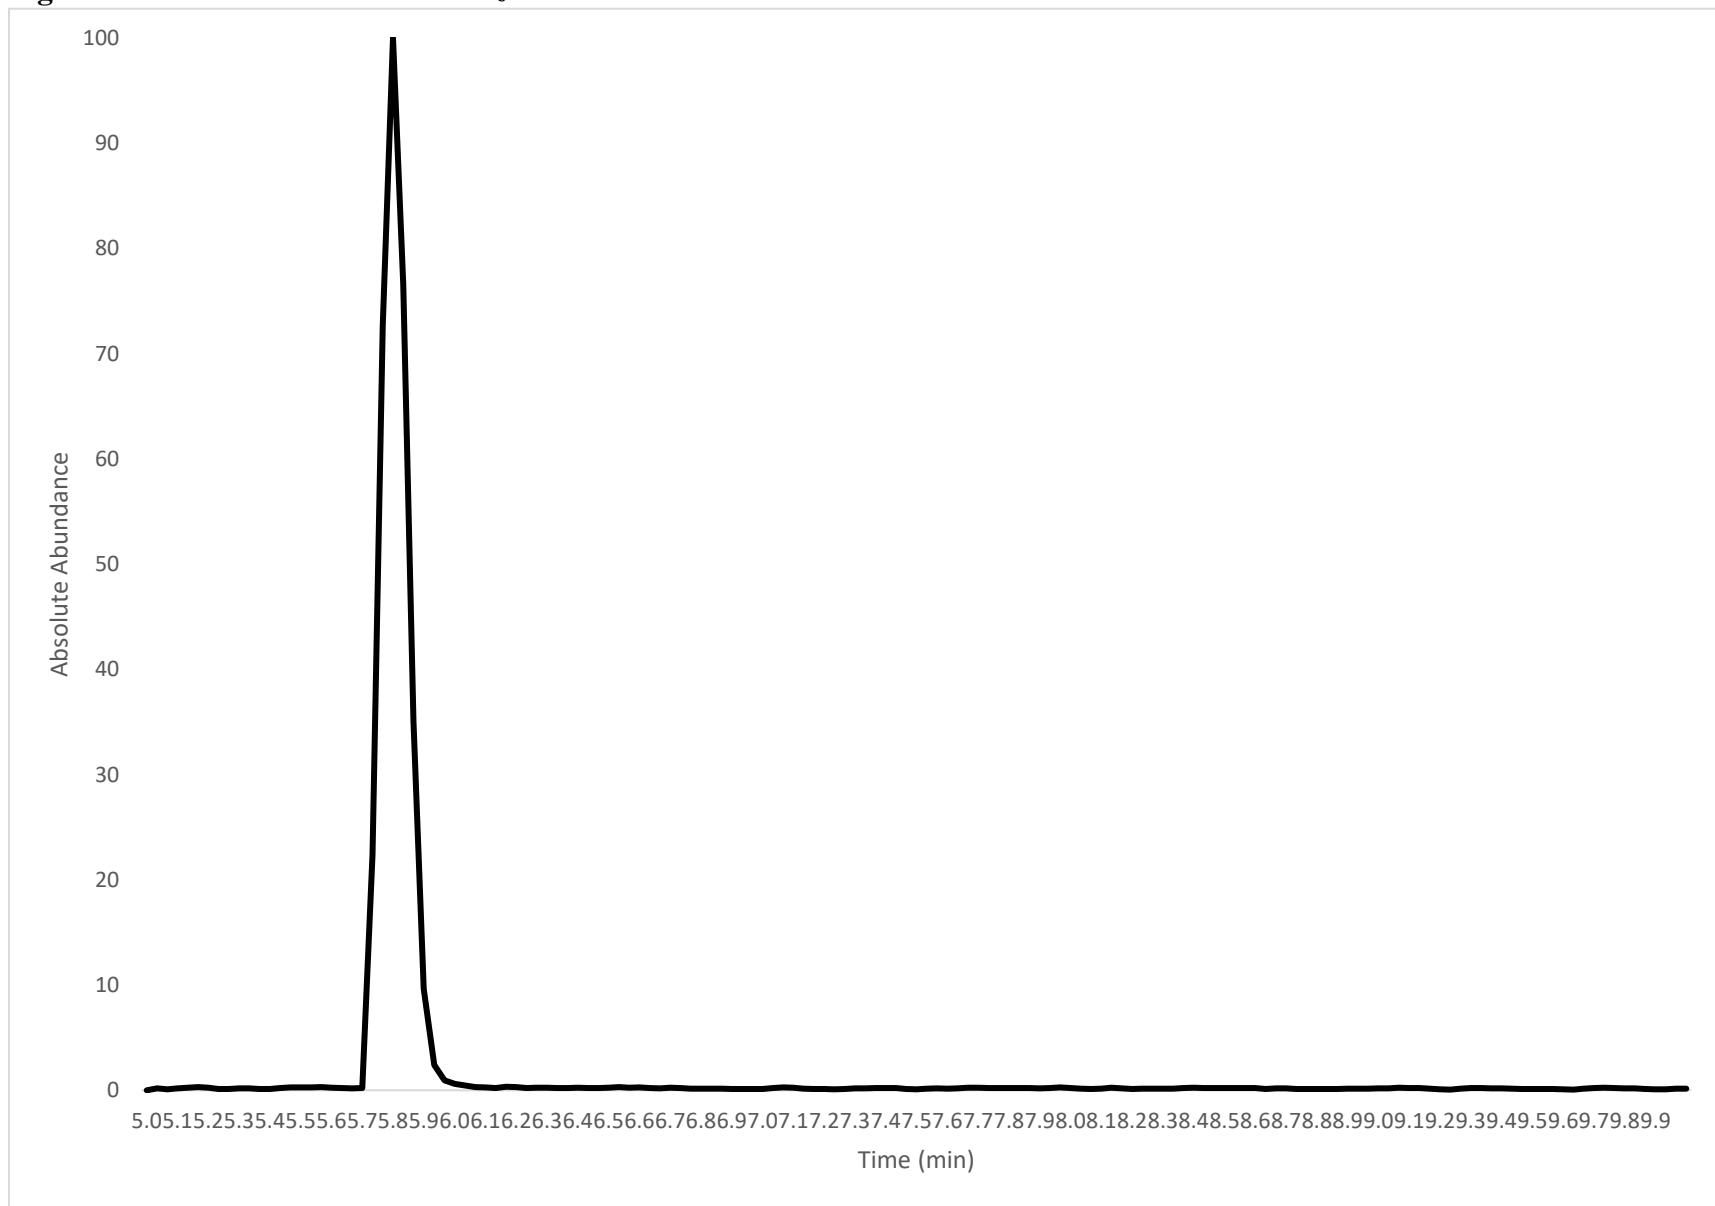

**Figure 47. Selected ion trace for  $m/z$  z 741-745 for FDAA derivatized L-threonine standard.**

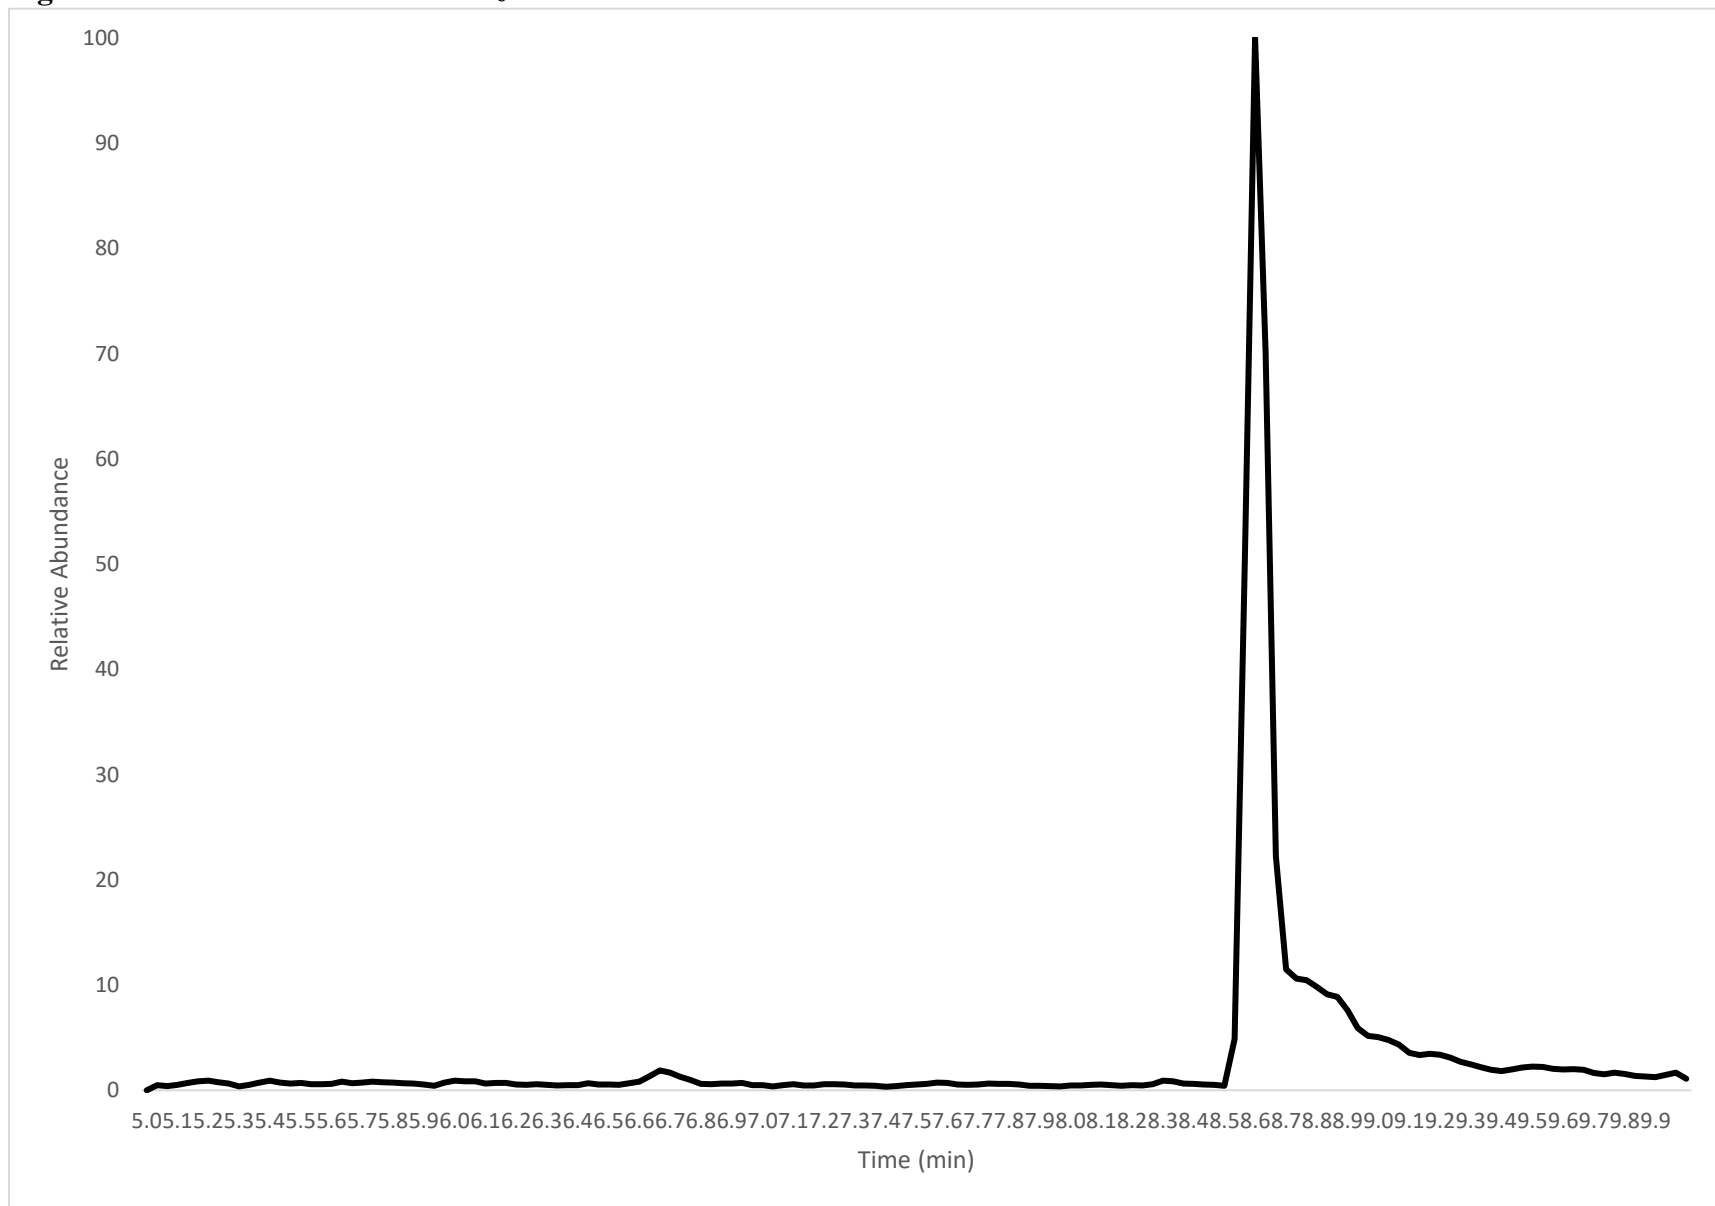

**Figure 48.** Selected ion trace for  $m/z$  737-740 for FDAA derivatized D-valine standard.

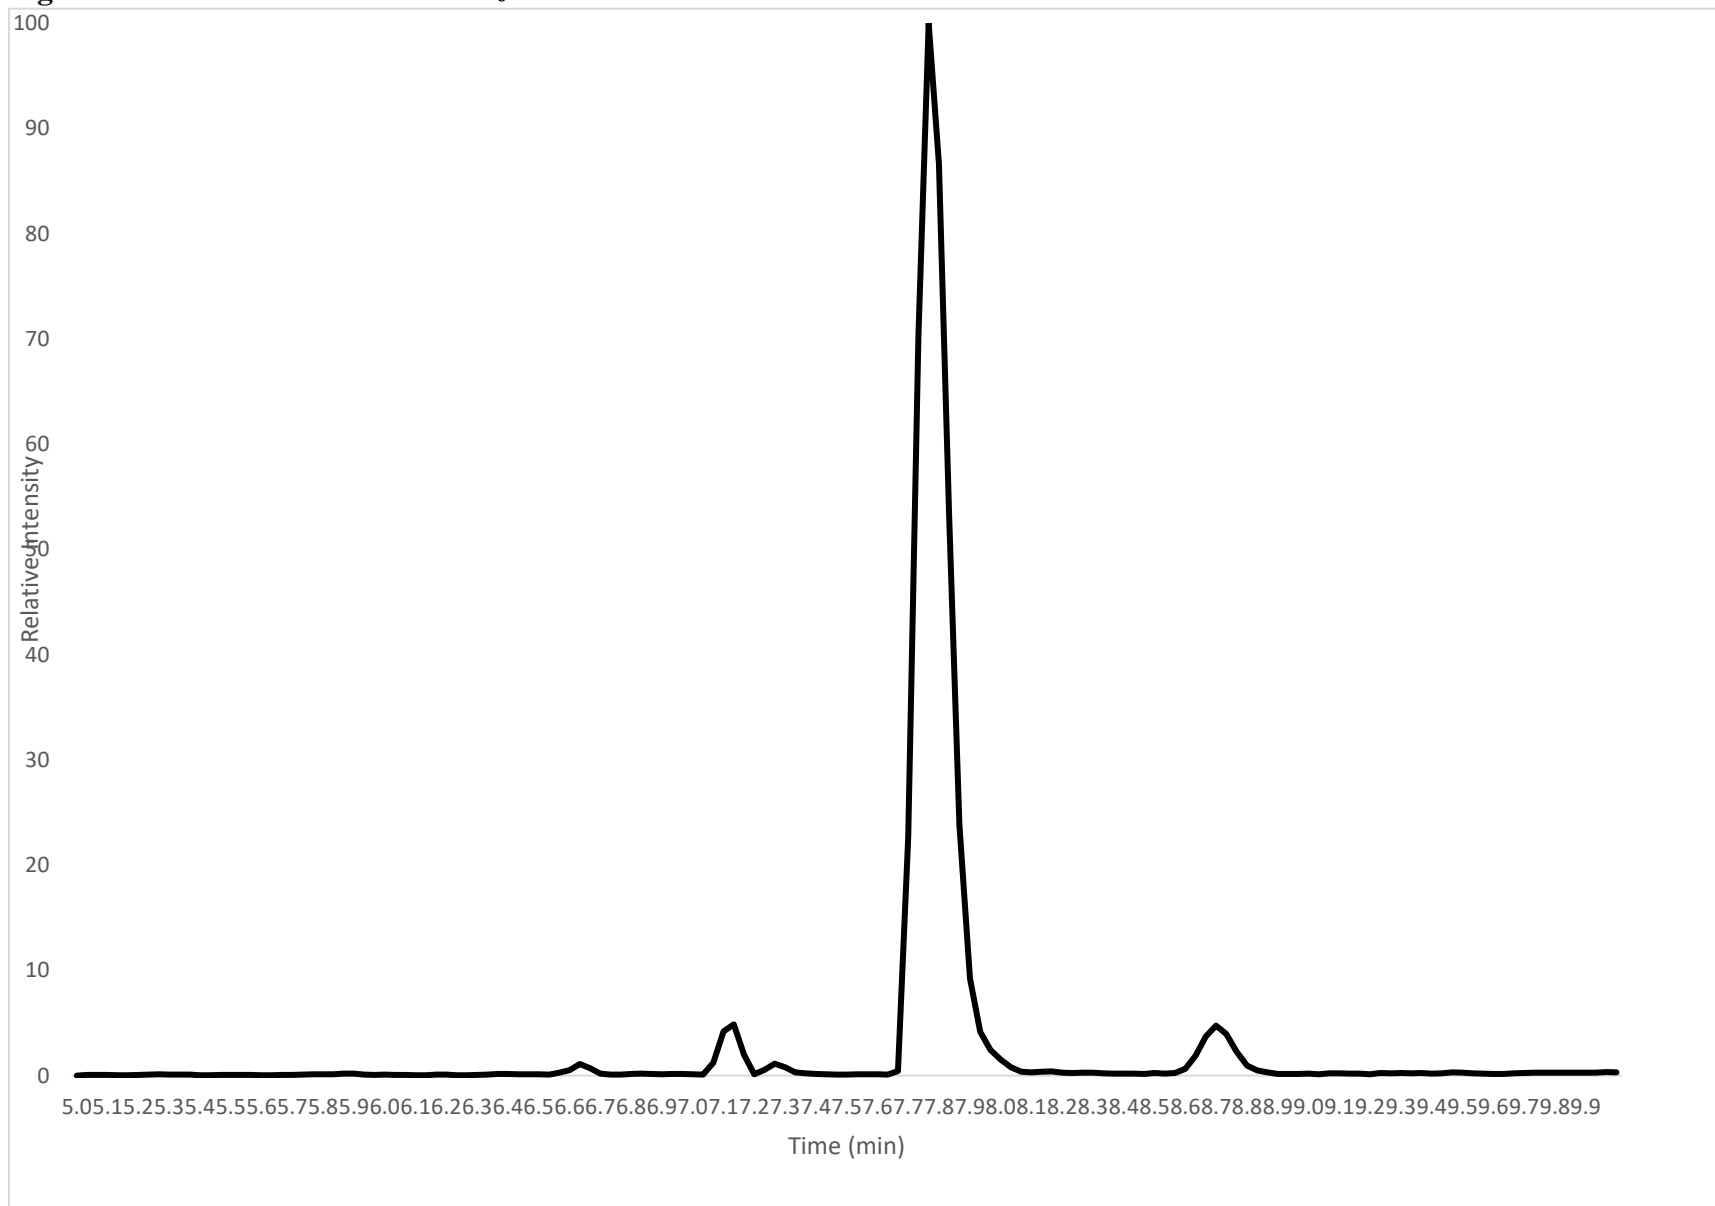



**Figure 49.** Selected ion trace for  $m/z$  737-740 for FDAA derivatized L-valine standard.

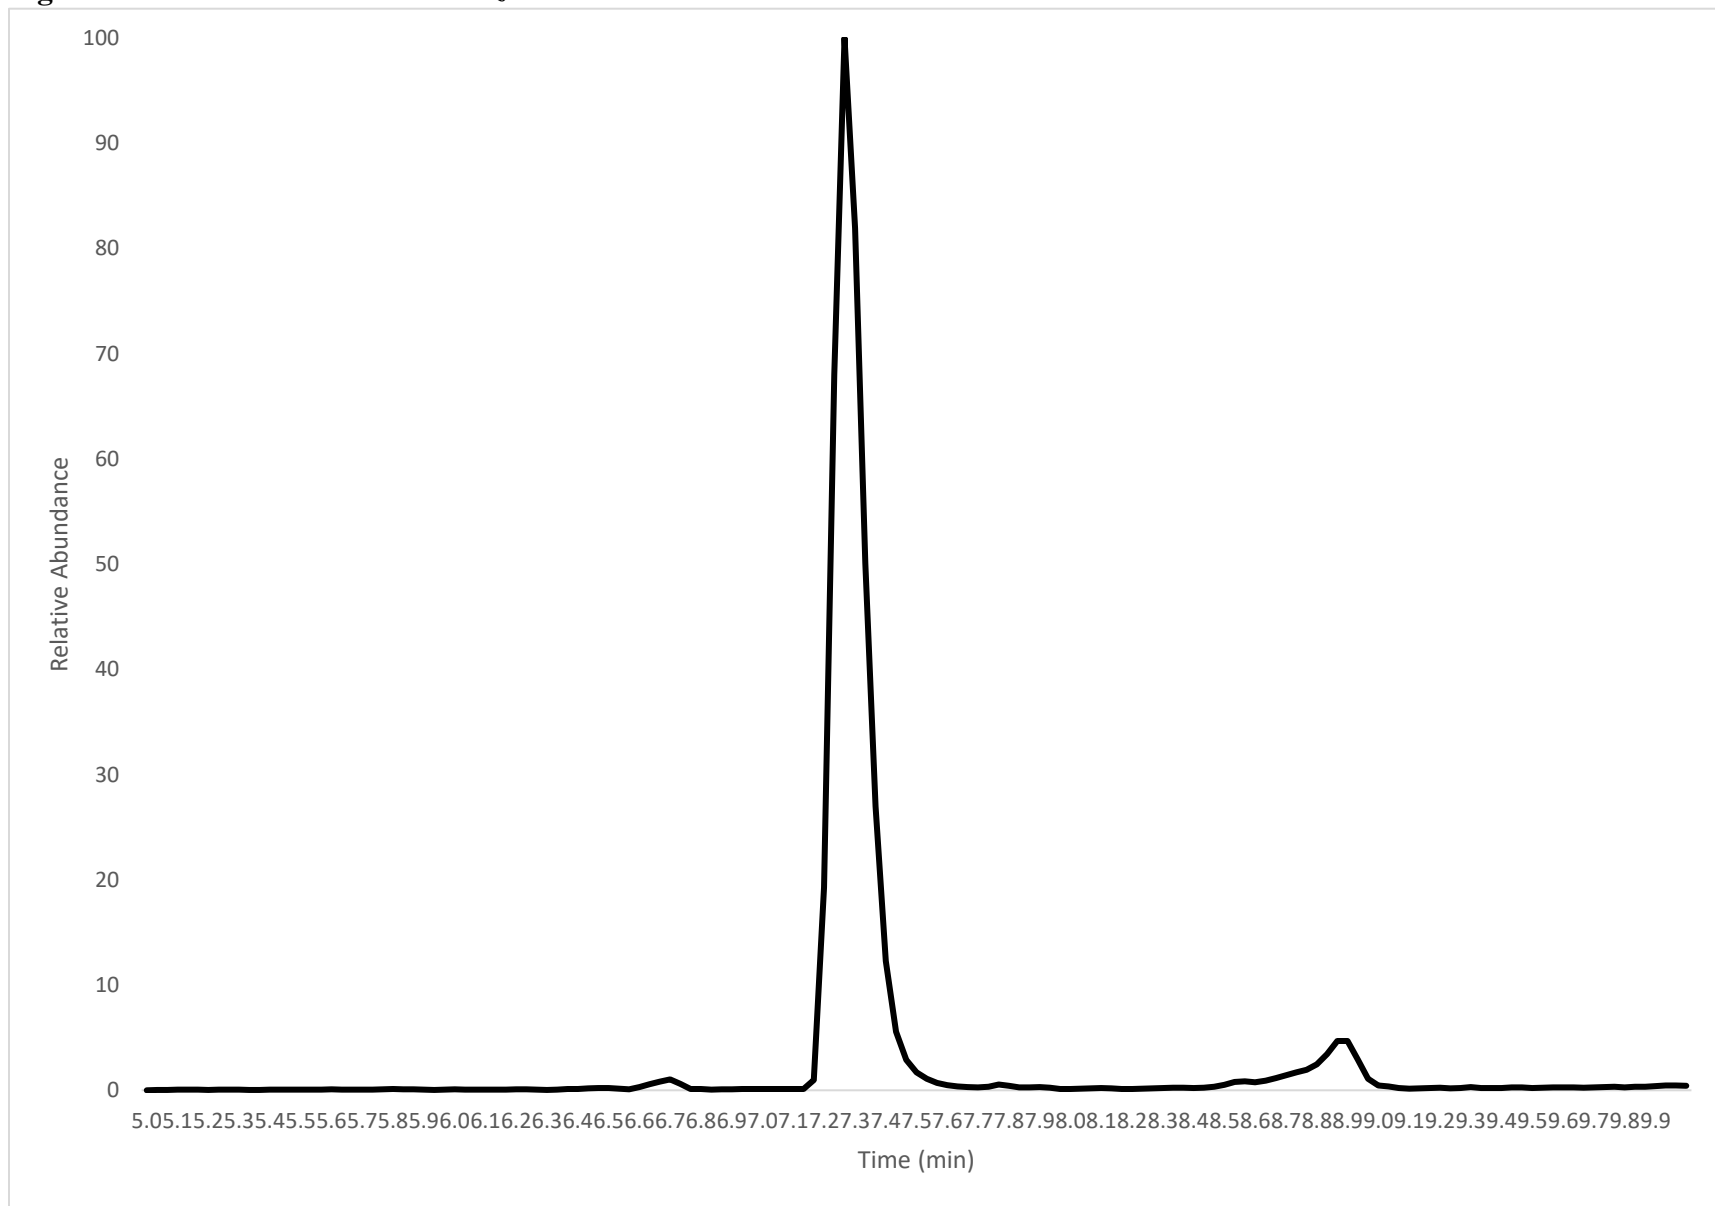

**Figure 50. Selected ion trace for  $m/z$  765-769 for FDAA derivatized D-isoleucine standard.**

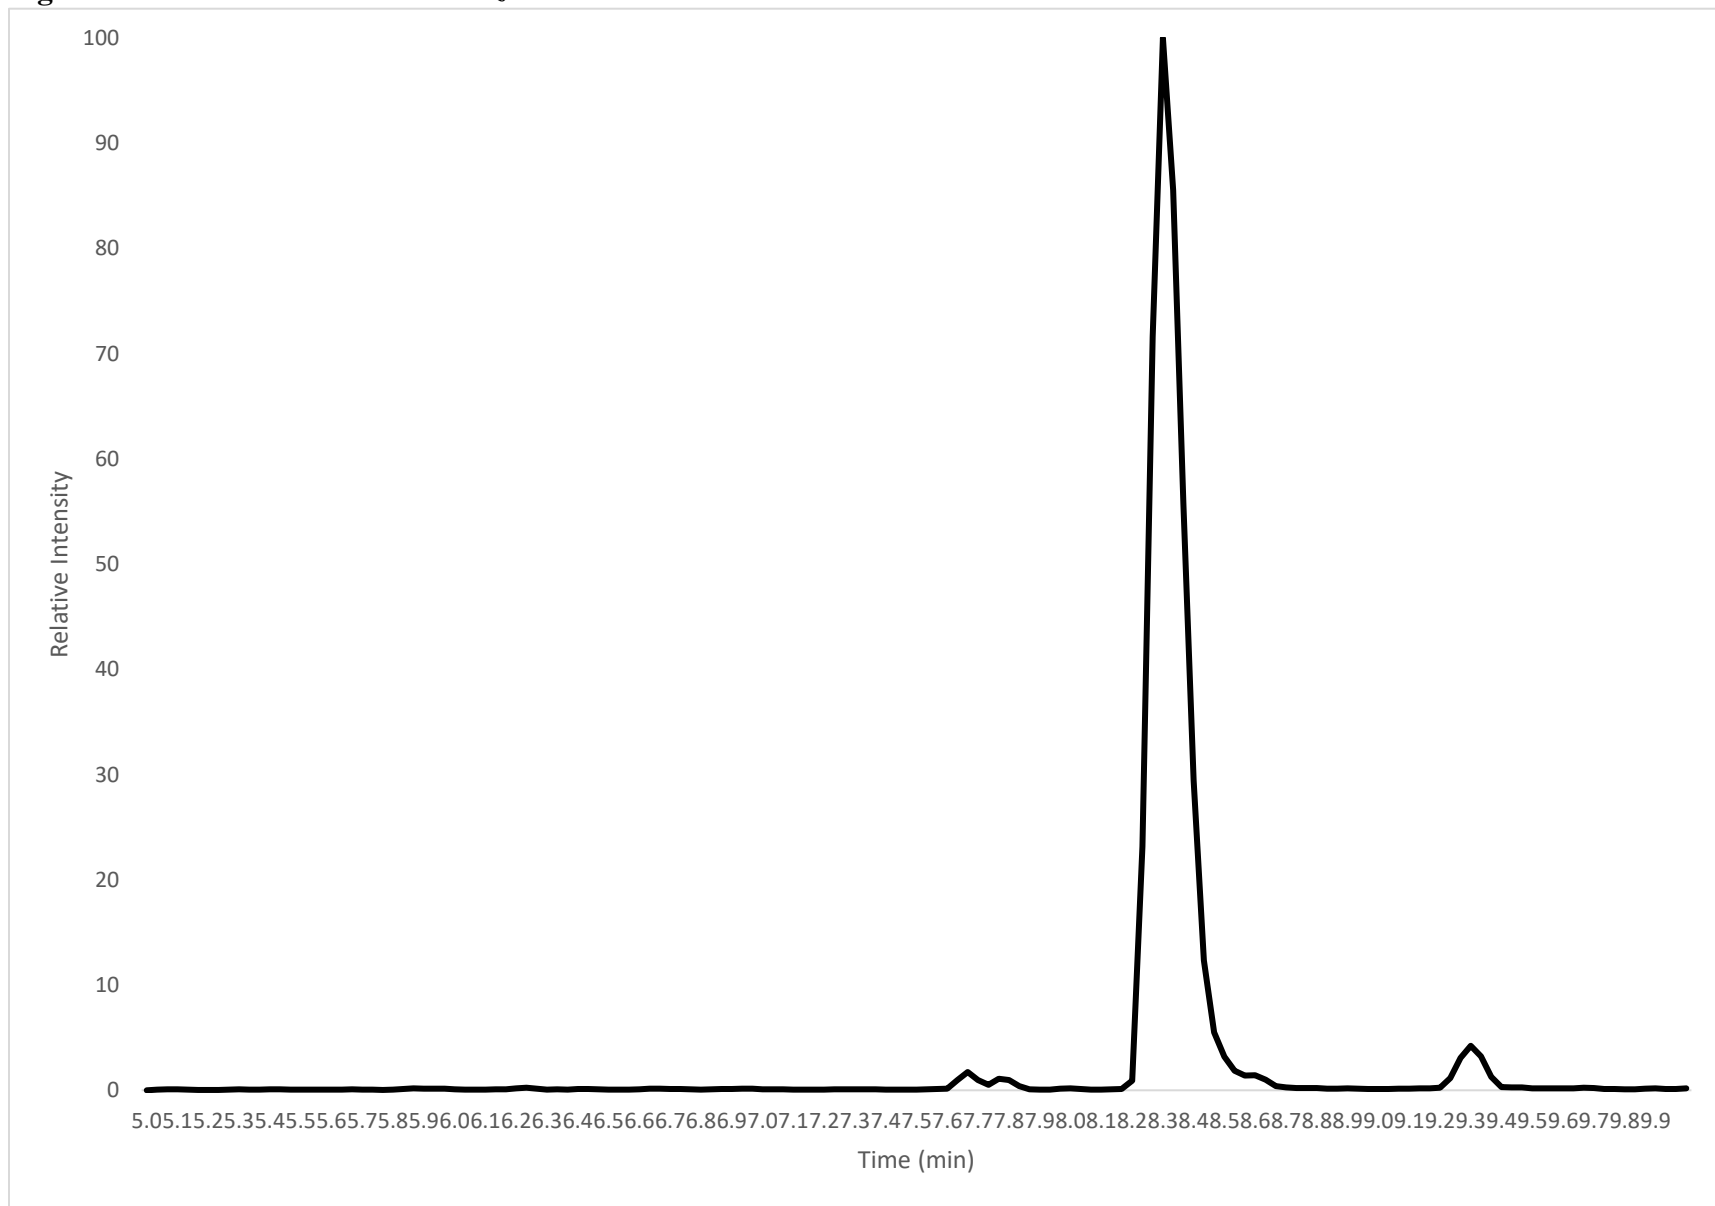

**Figure 51. Selected ion trace for  $m/z$  765-769 for FDAA derivatized L-isoleucine standard.**

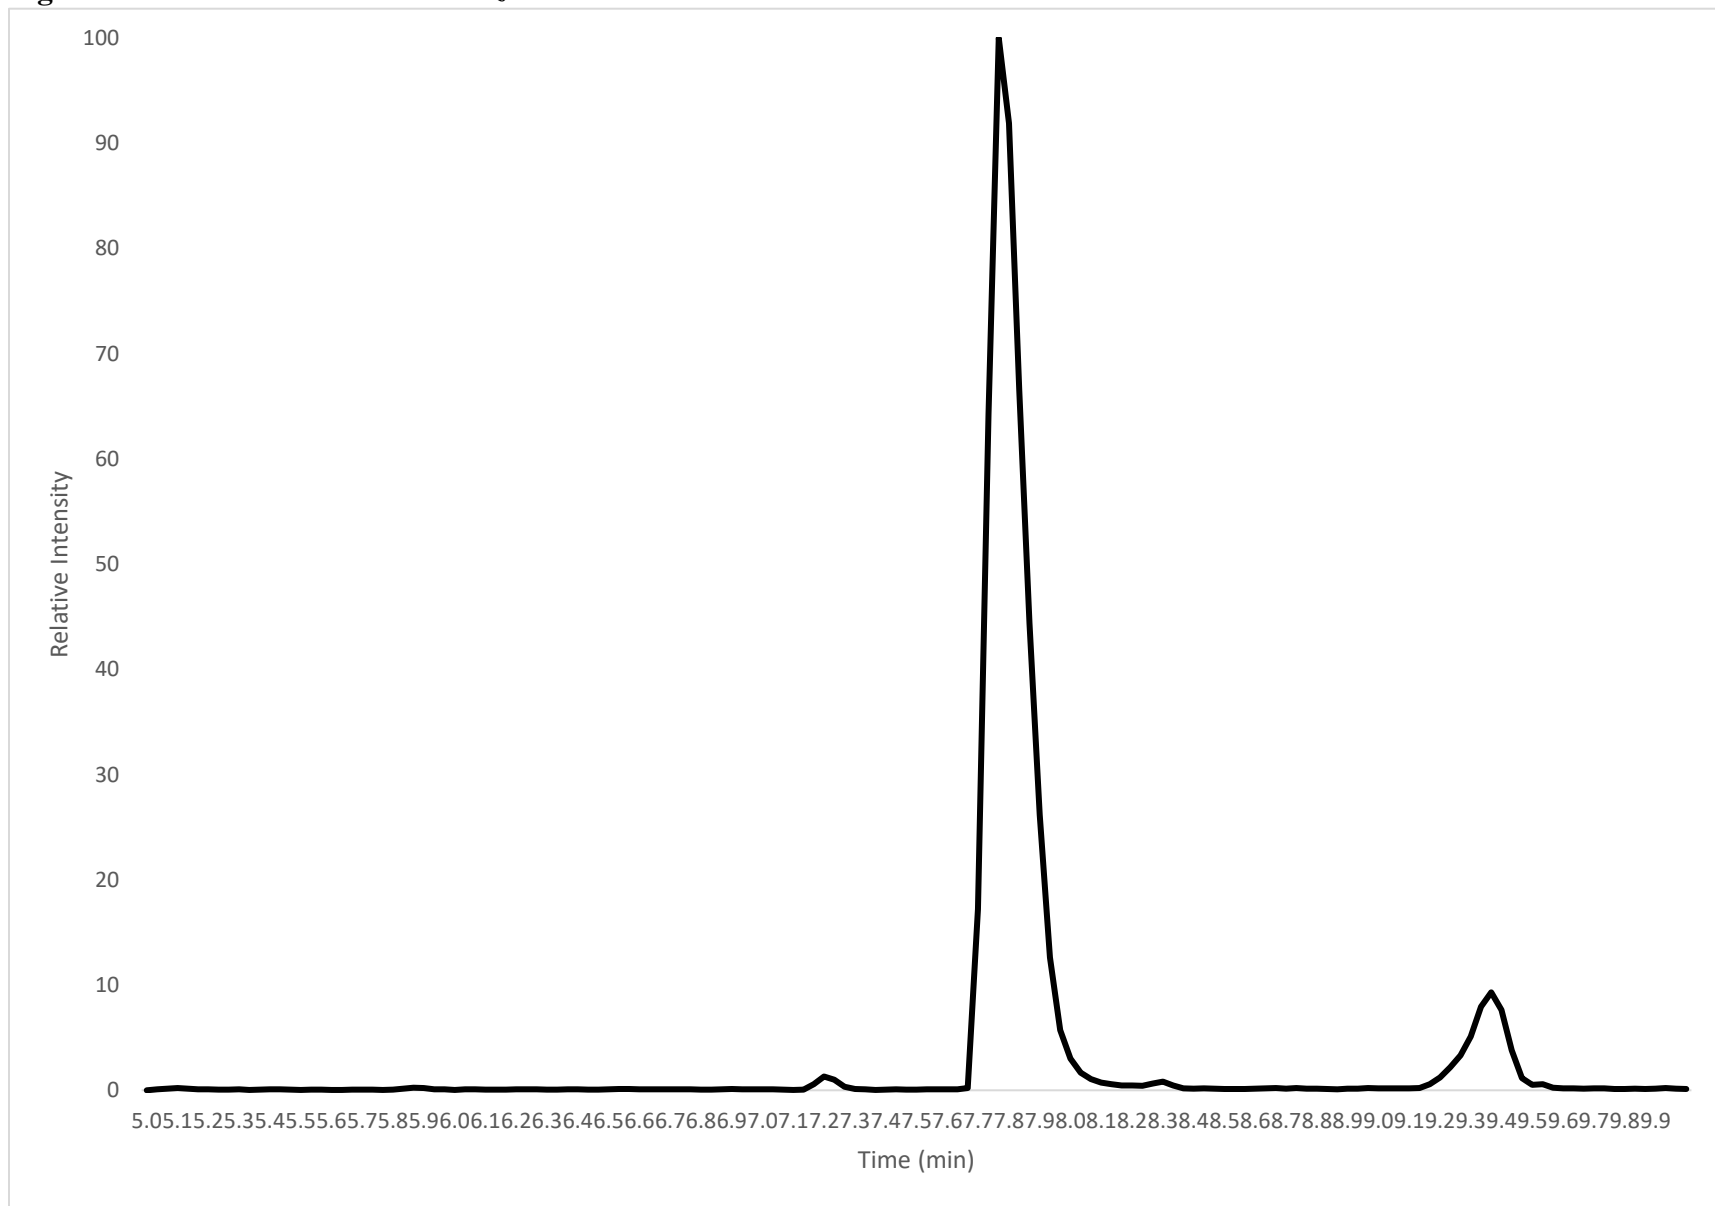

**Figure 52. Selected ion trace for  $m/z$  765-769 for FDAA derivatized D-allo-isoleucine standard.**

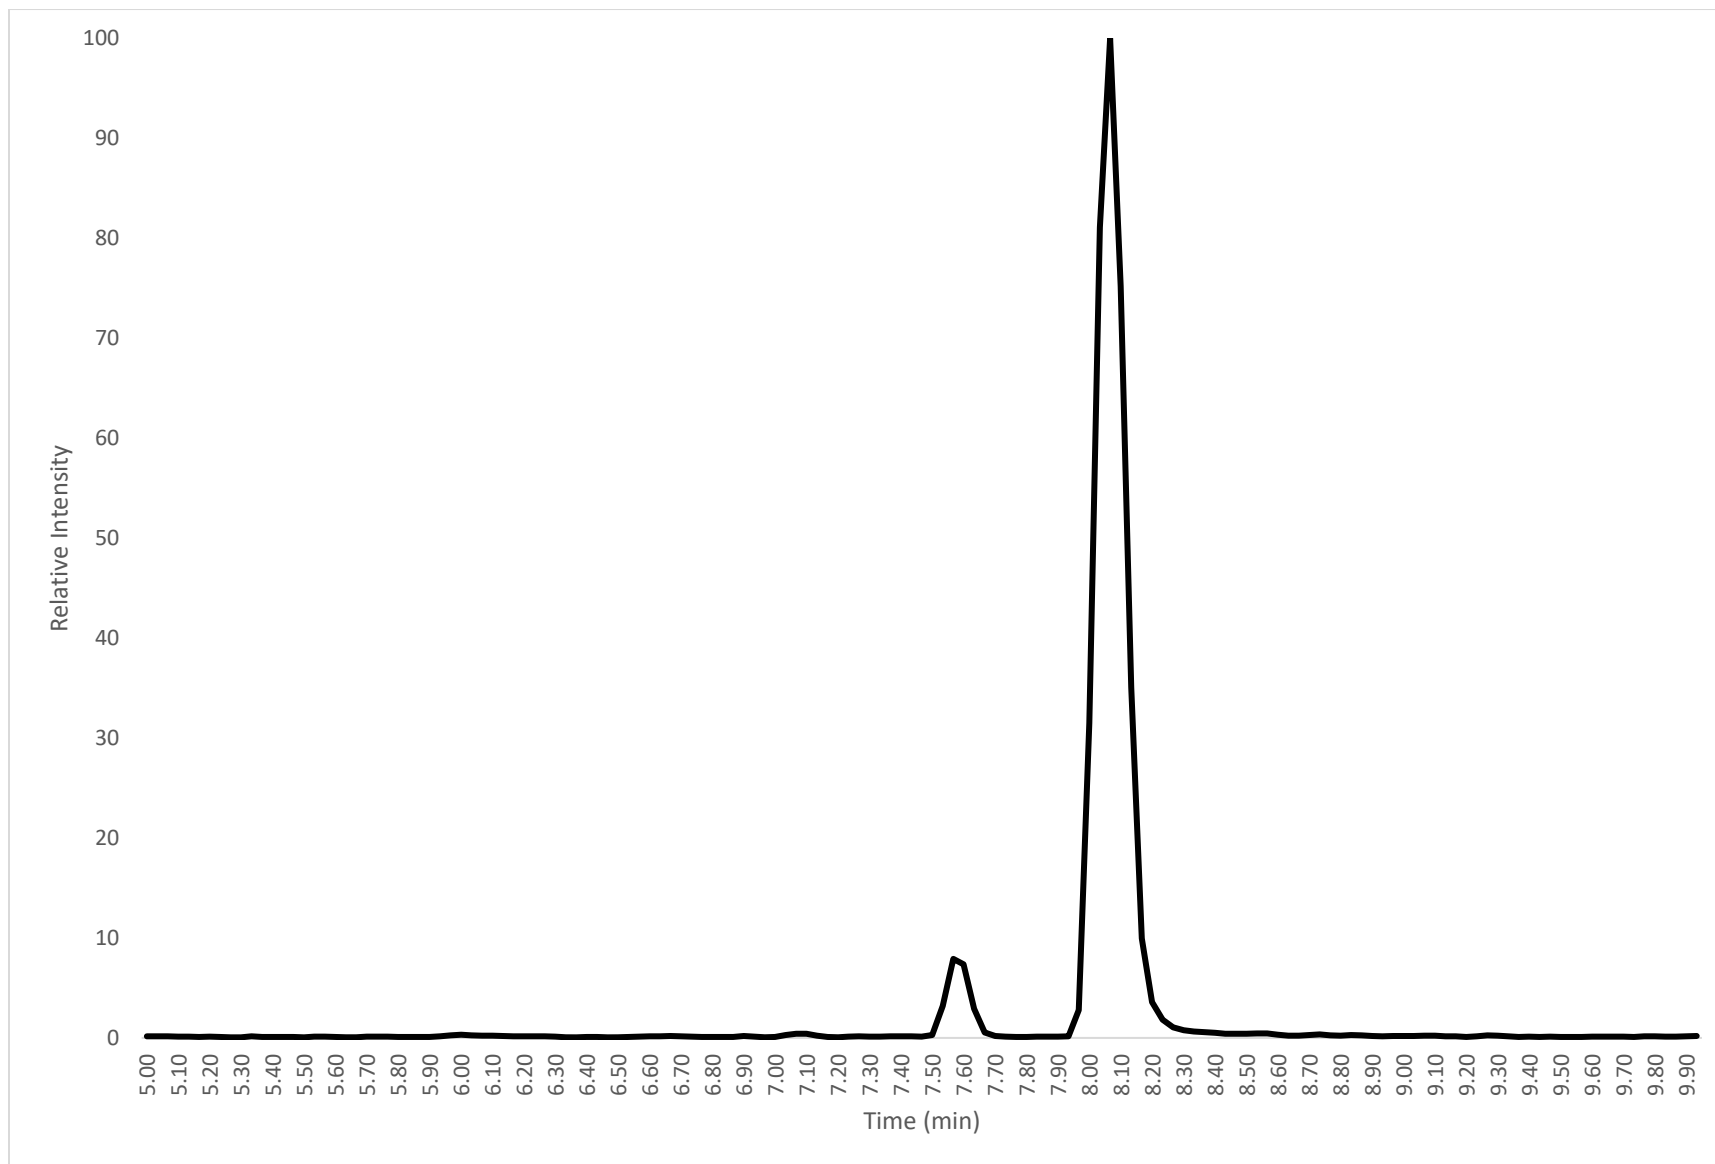

**Figure 53. Selected ion trace for  $m/z$  765-769 for FDAA derivatized L-allo-isoleucine standard.**

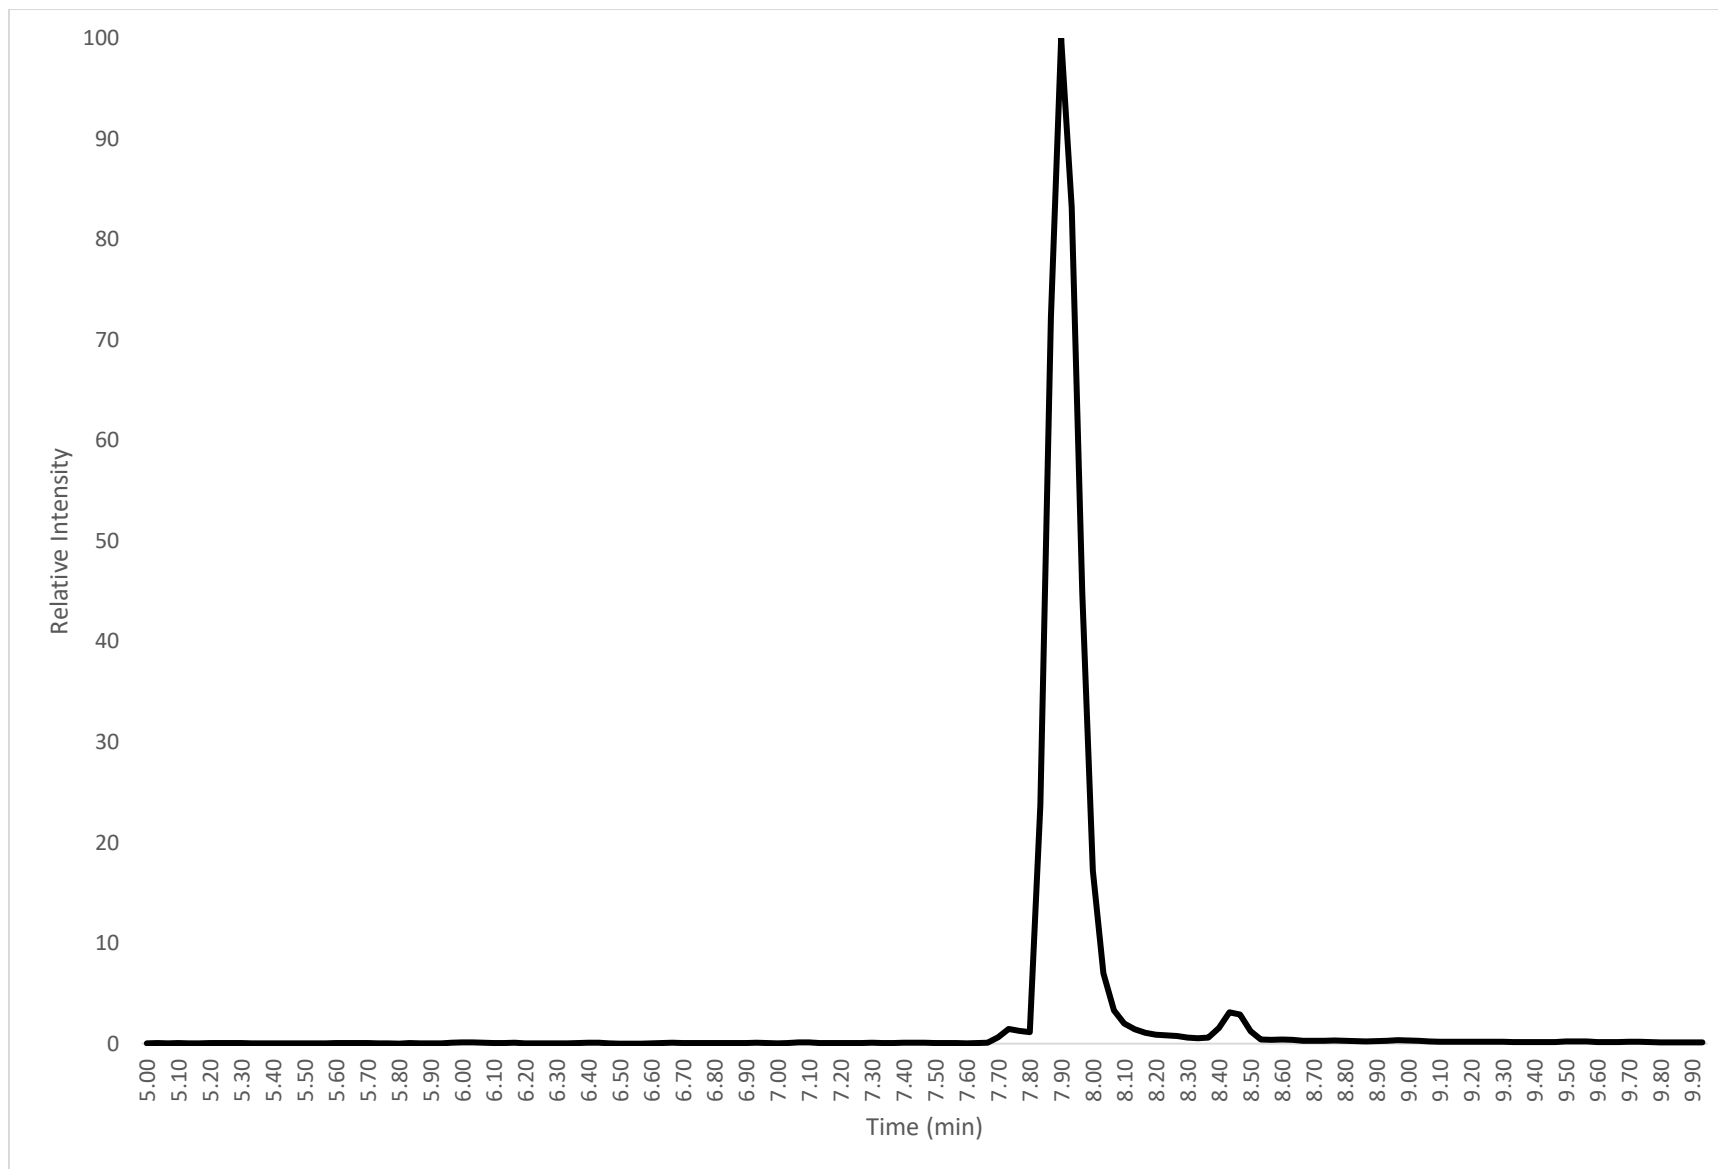

**Figure 54. Selected ion trace for  $m/z$  765-769 for FDAA derivatized D-leucine standard.**

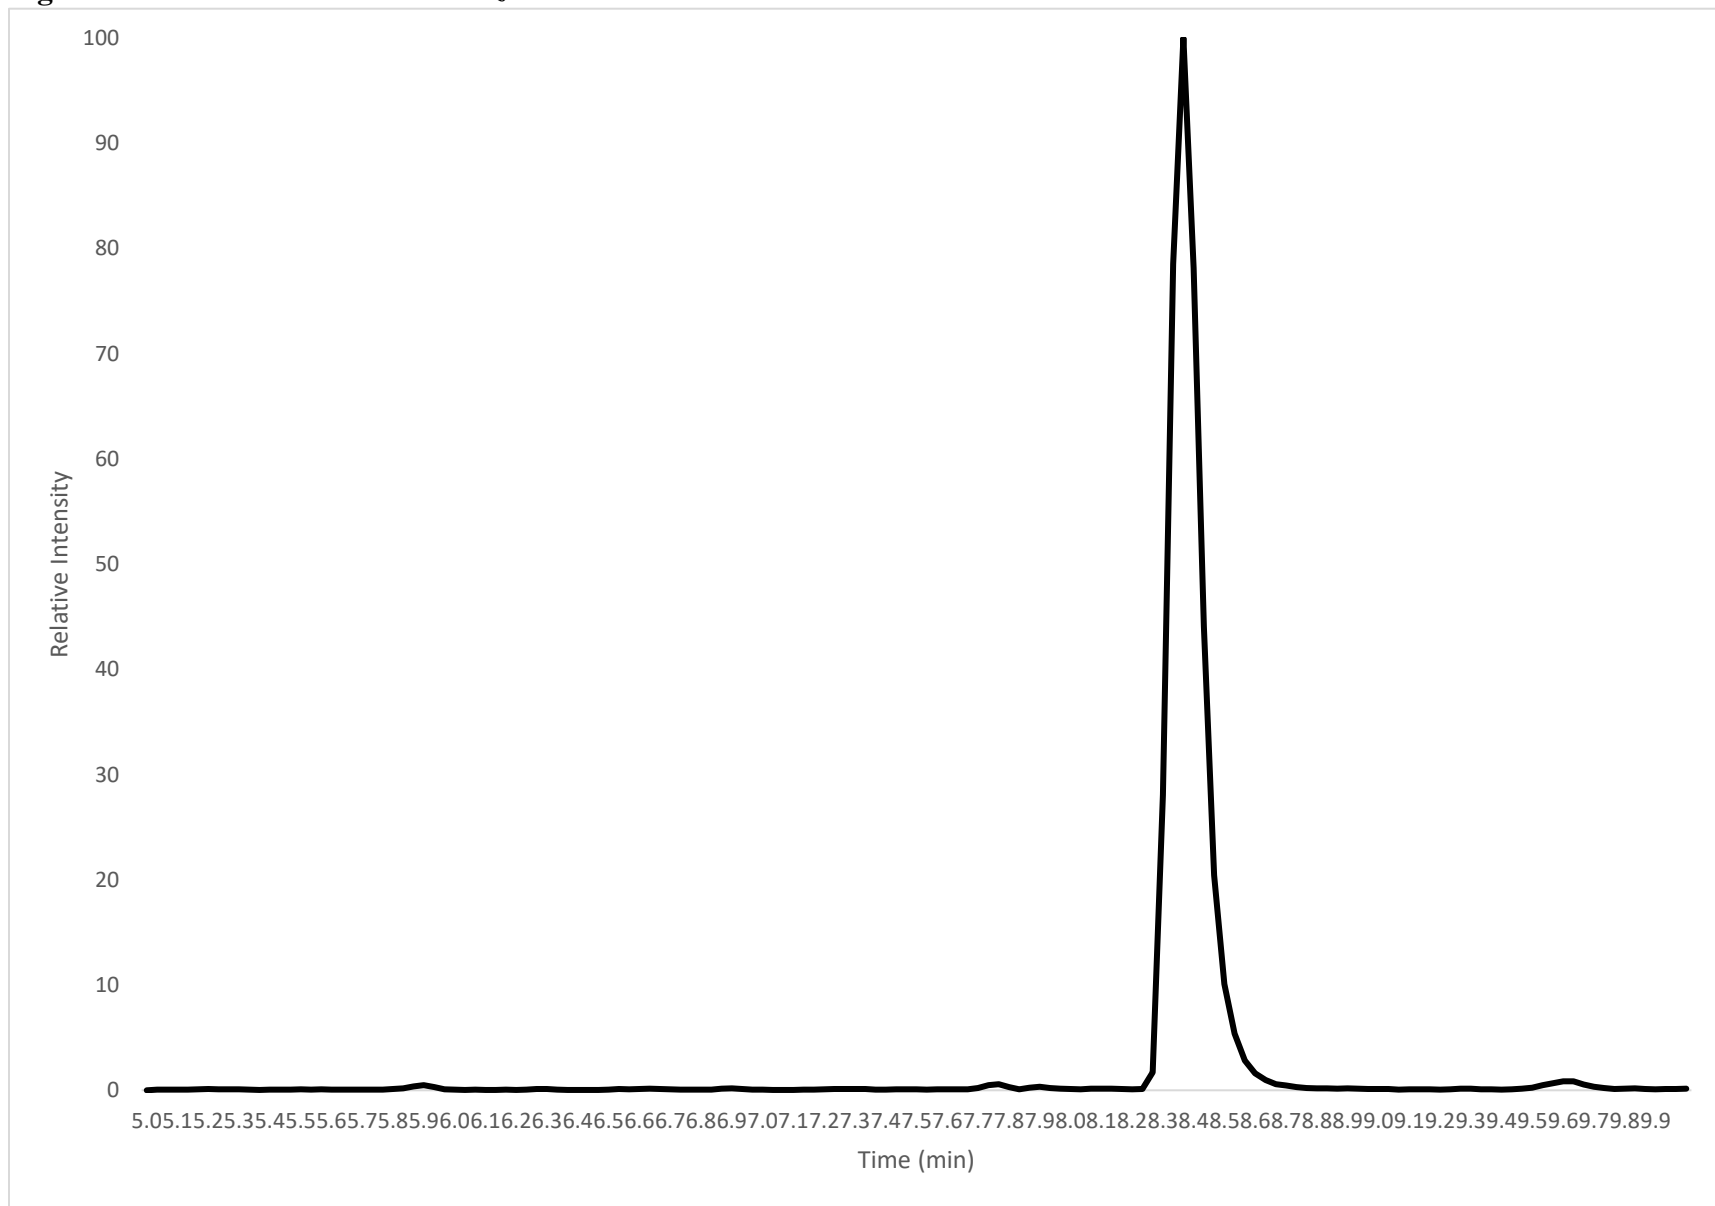

**Figure 55. Selected ion trace for  $m/z$  765-769 for FDAA derivatized L-leucine standard.**

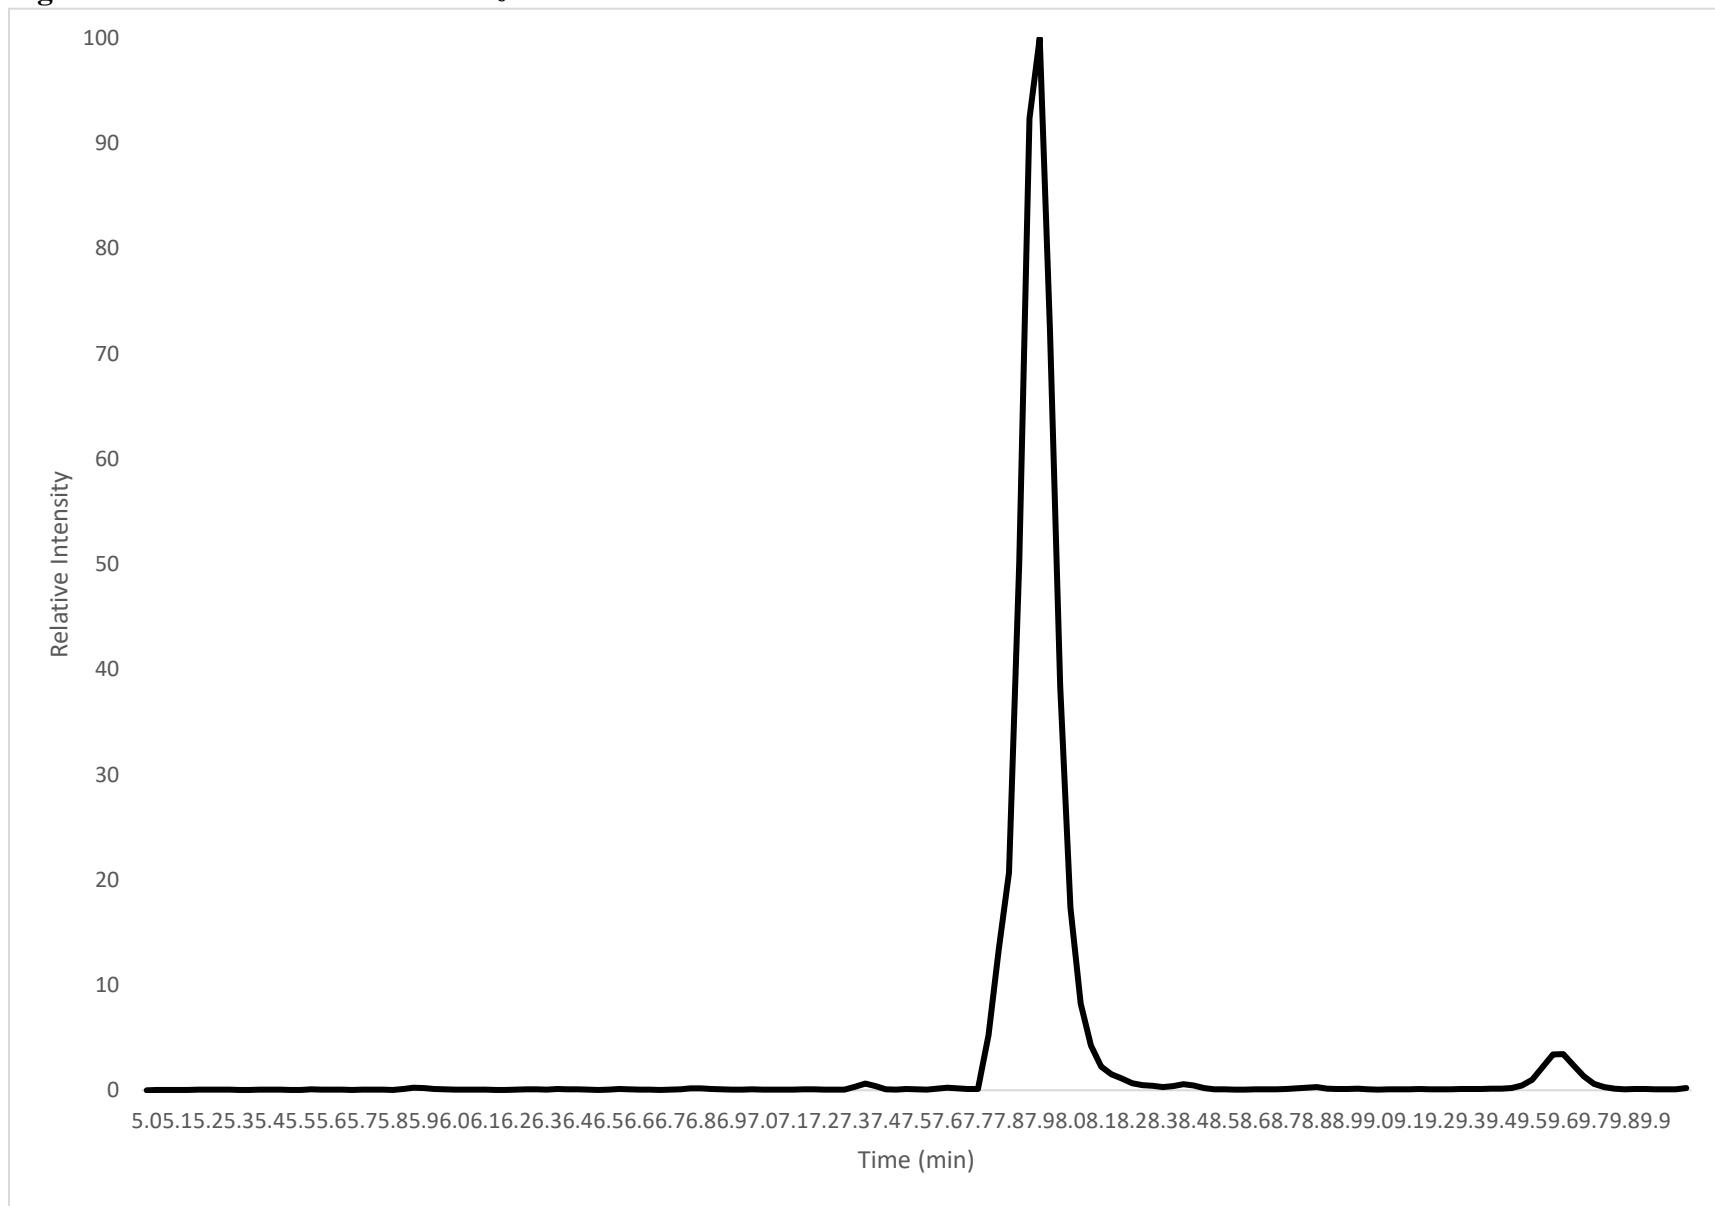

**Figure 56. Selected ion trace for  $m/z$  713-717 for FDAA derivatized D-serine standard.**

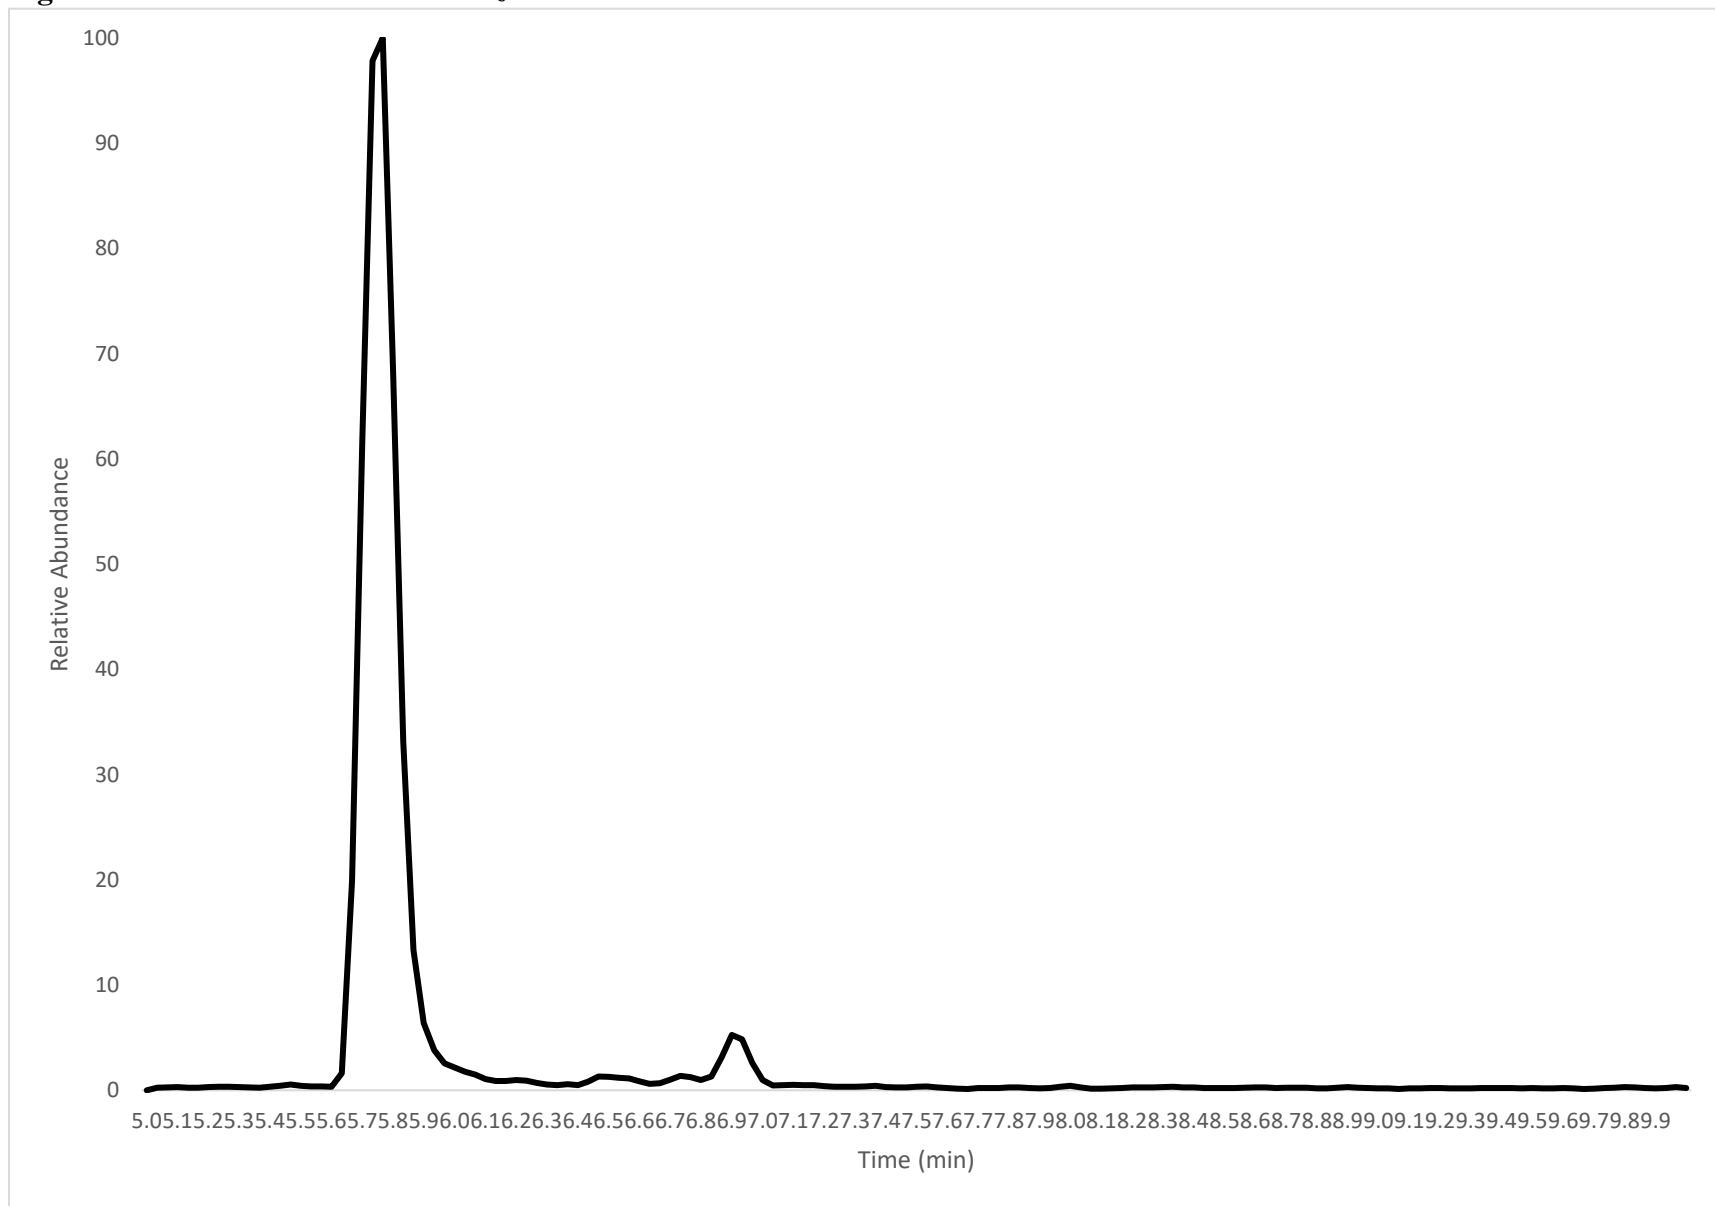



**Figure 57. Selected ion trace for  $m/z$  713-717 for FDAA derivatized L-serine standard.**

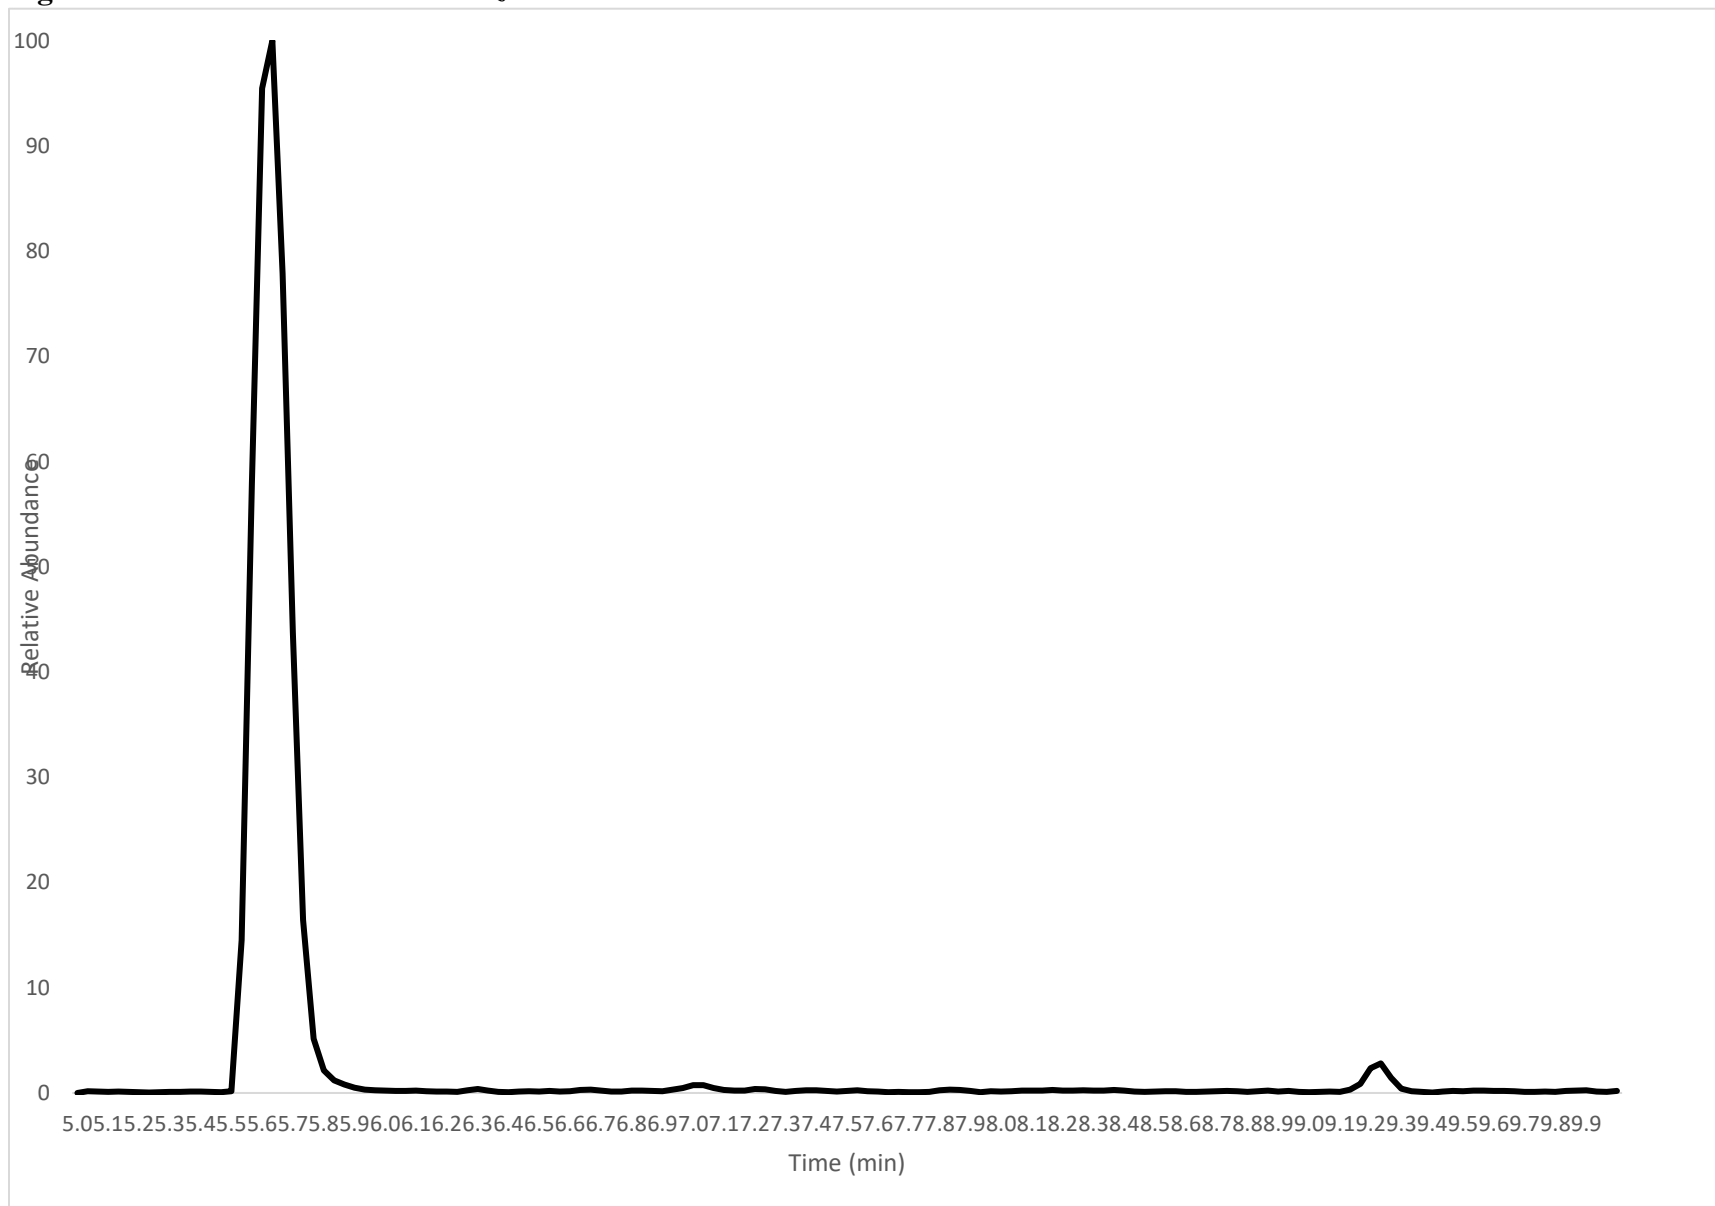

**Figure 58. Selected ion trace for  $m/z$  833-837 for FDAA derivatized D/L-phenylalanine mixture standard.**

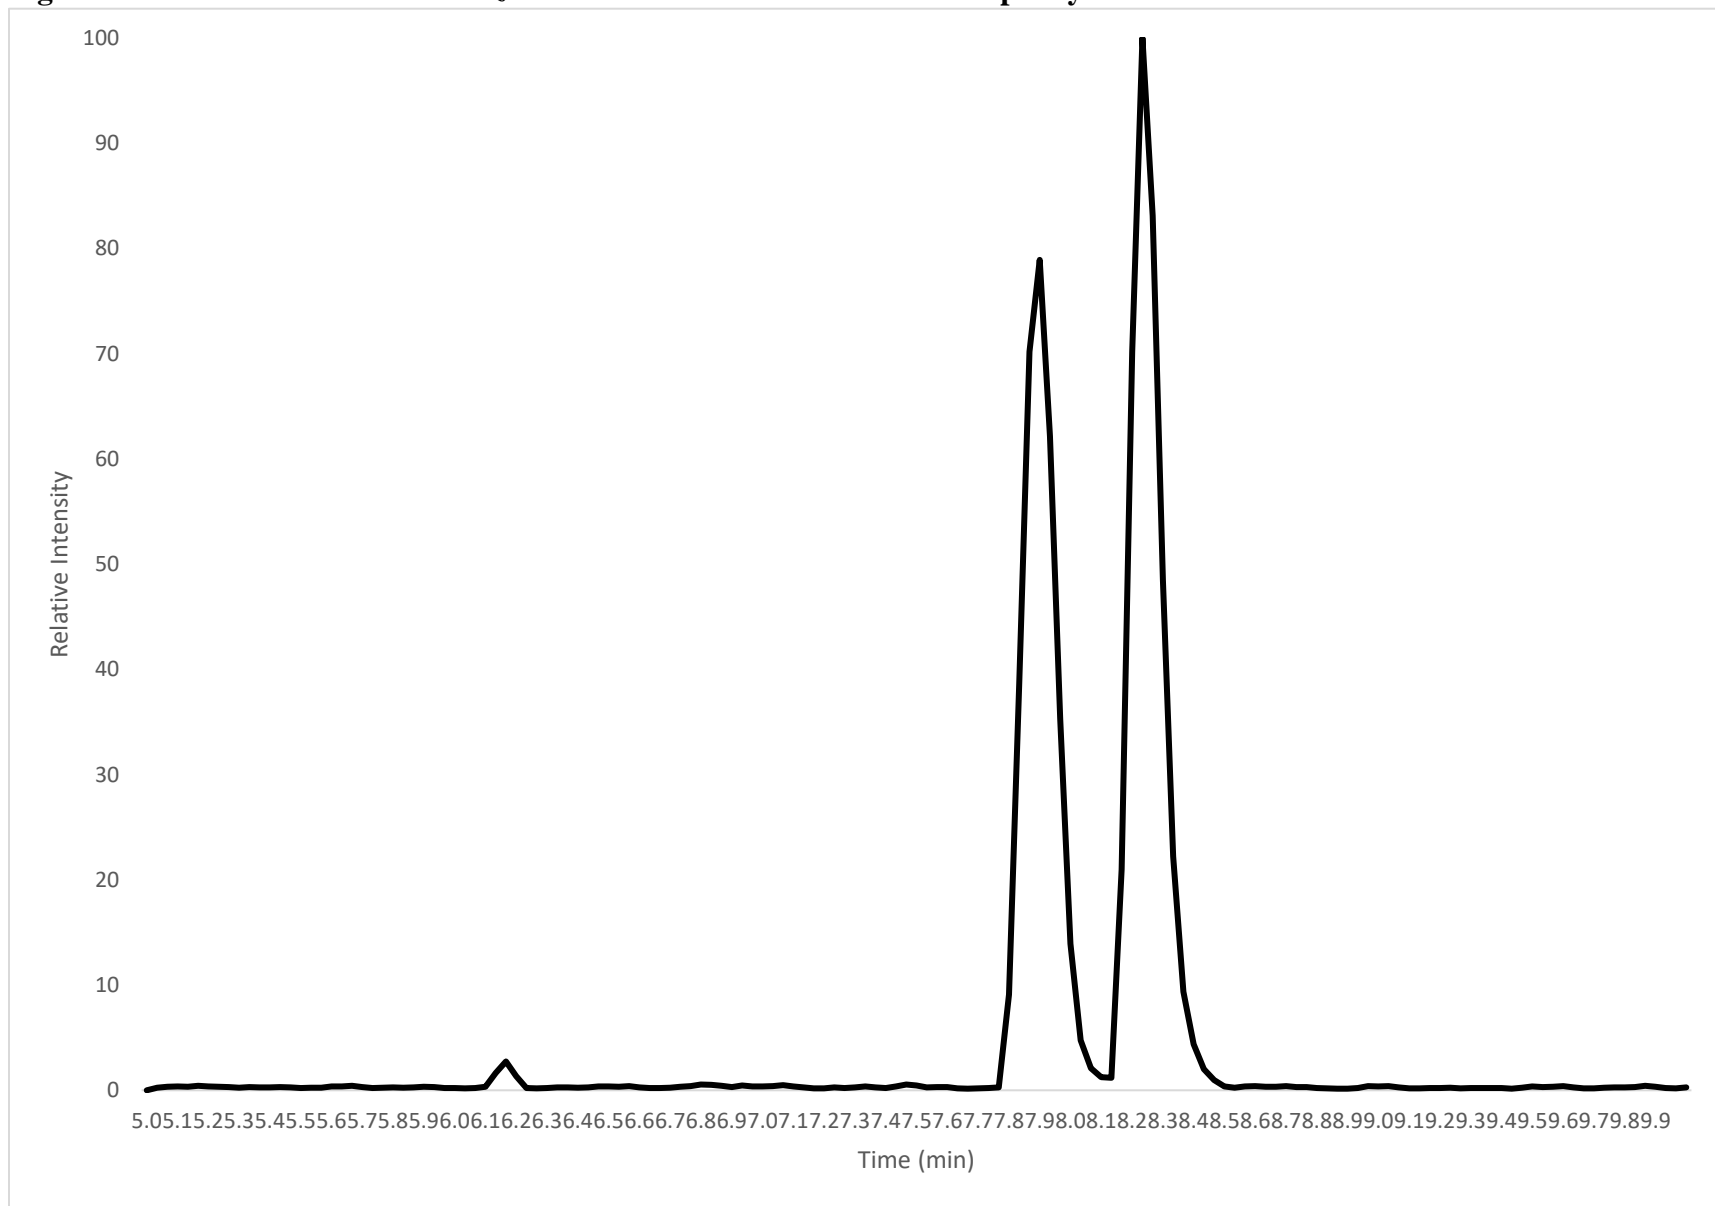

**Figure 59. Selected ion trace for  $m/z$  833-837 for FDAA derivatized L-phenylalanine standard.**

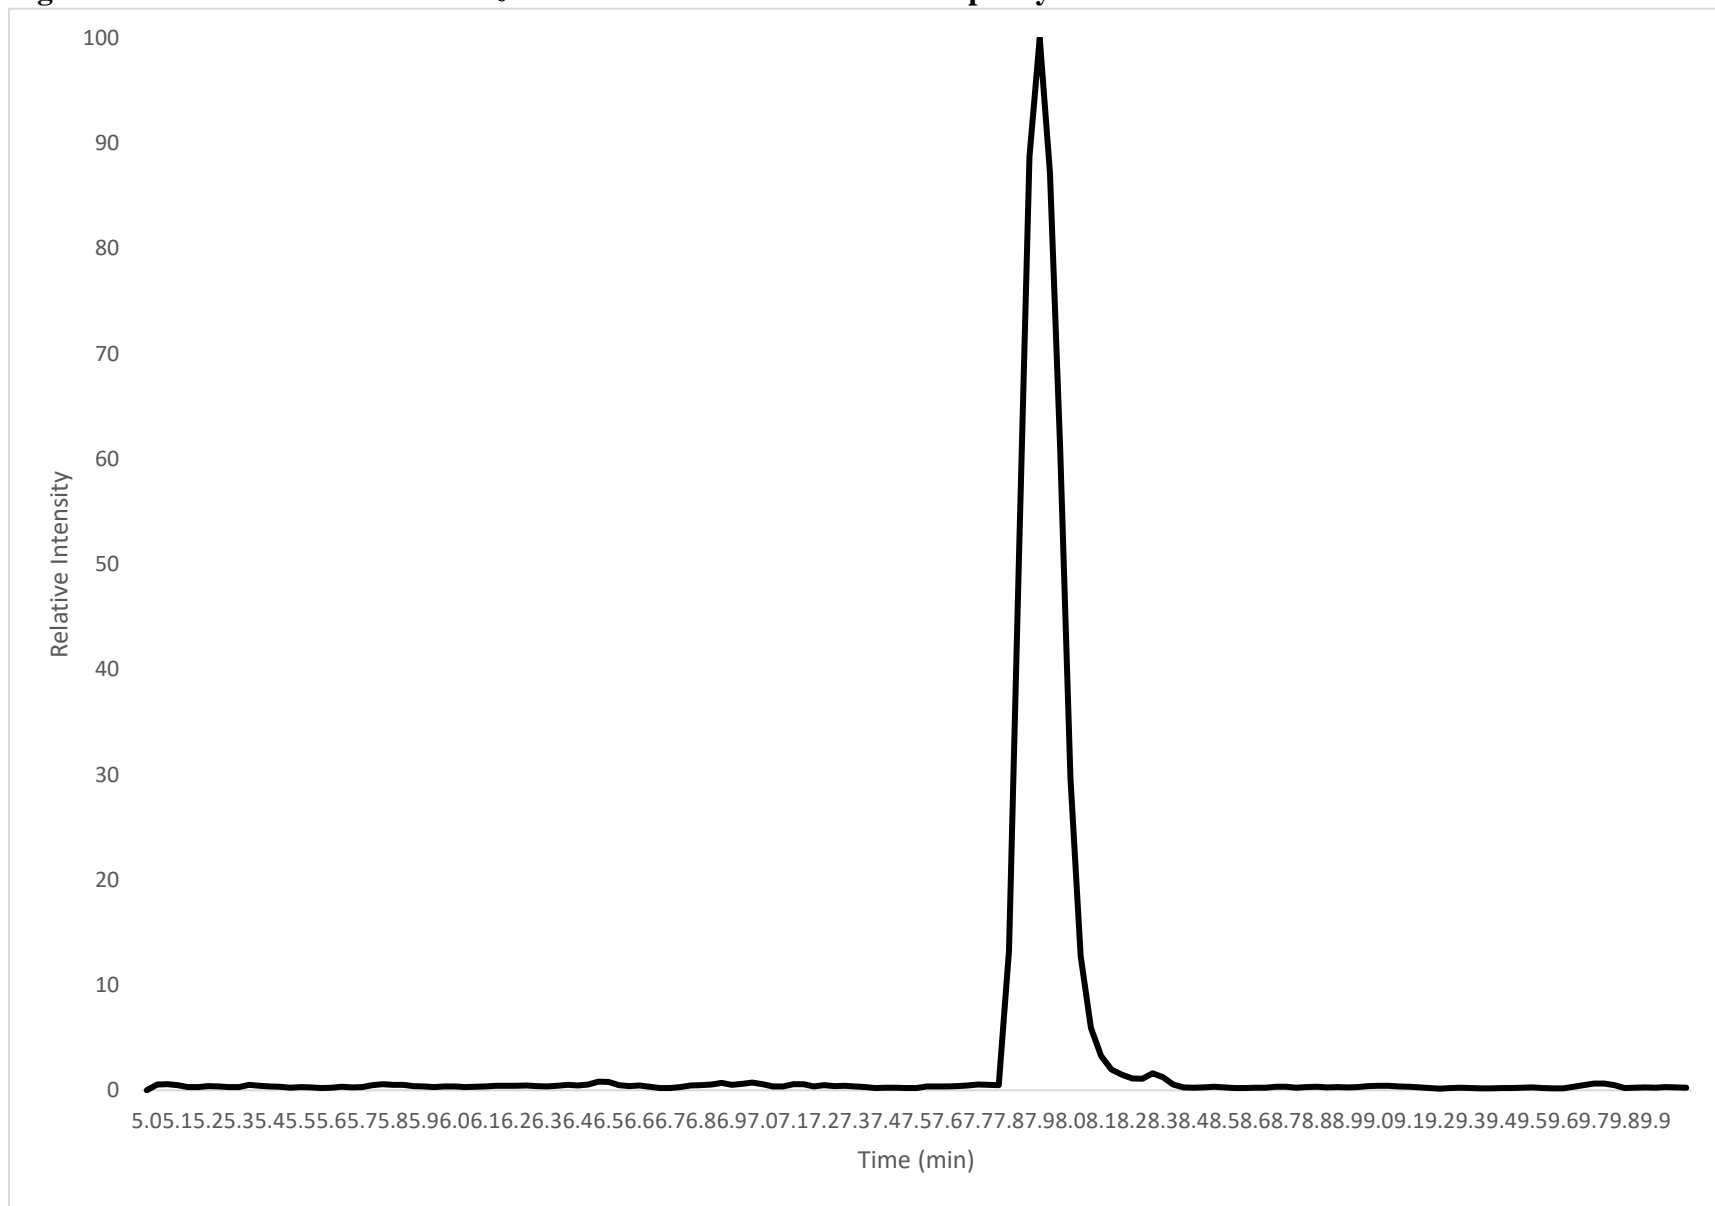

**Figure 60. Selected ion trace for  $m/z$  684-688 for FDAA derivatized D/L-tyrosine mixture standard.**

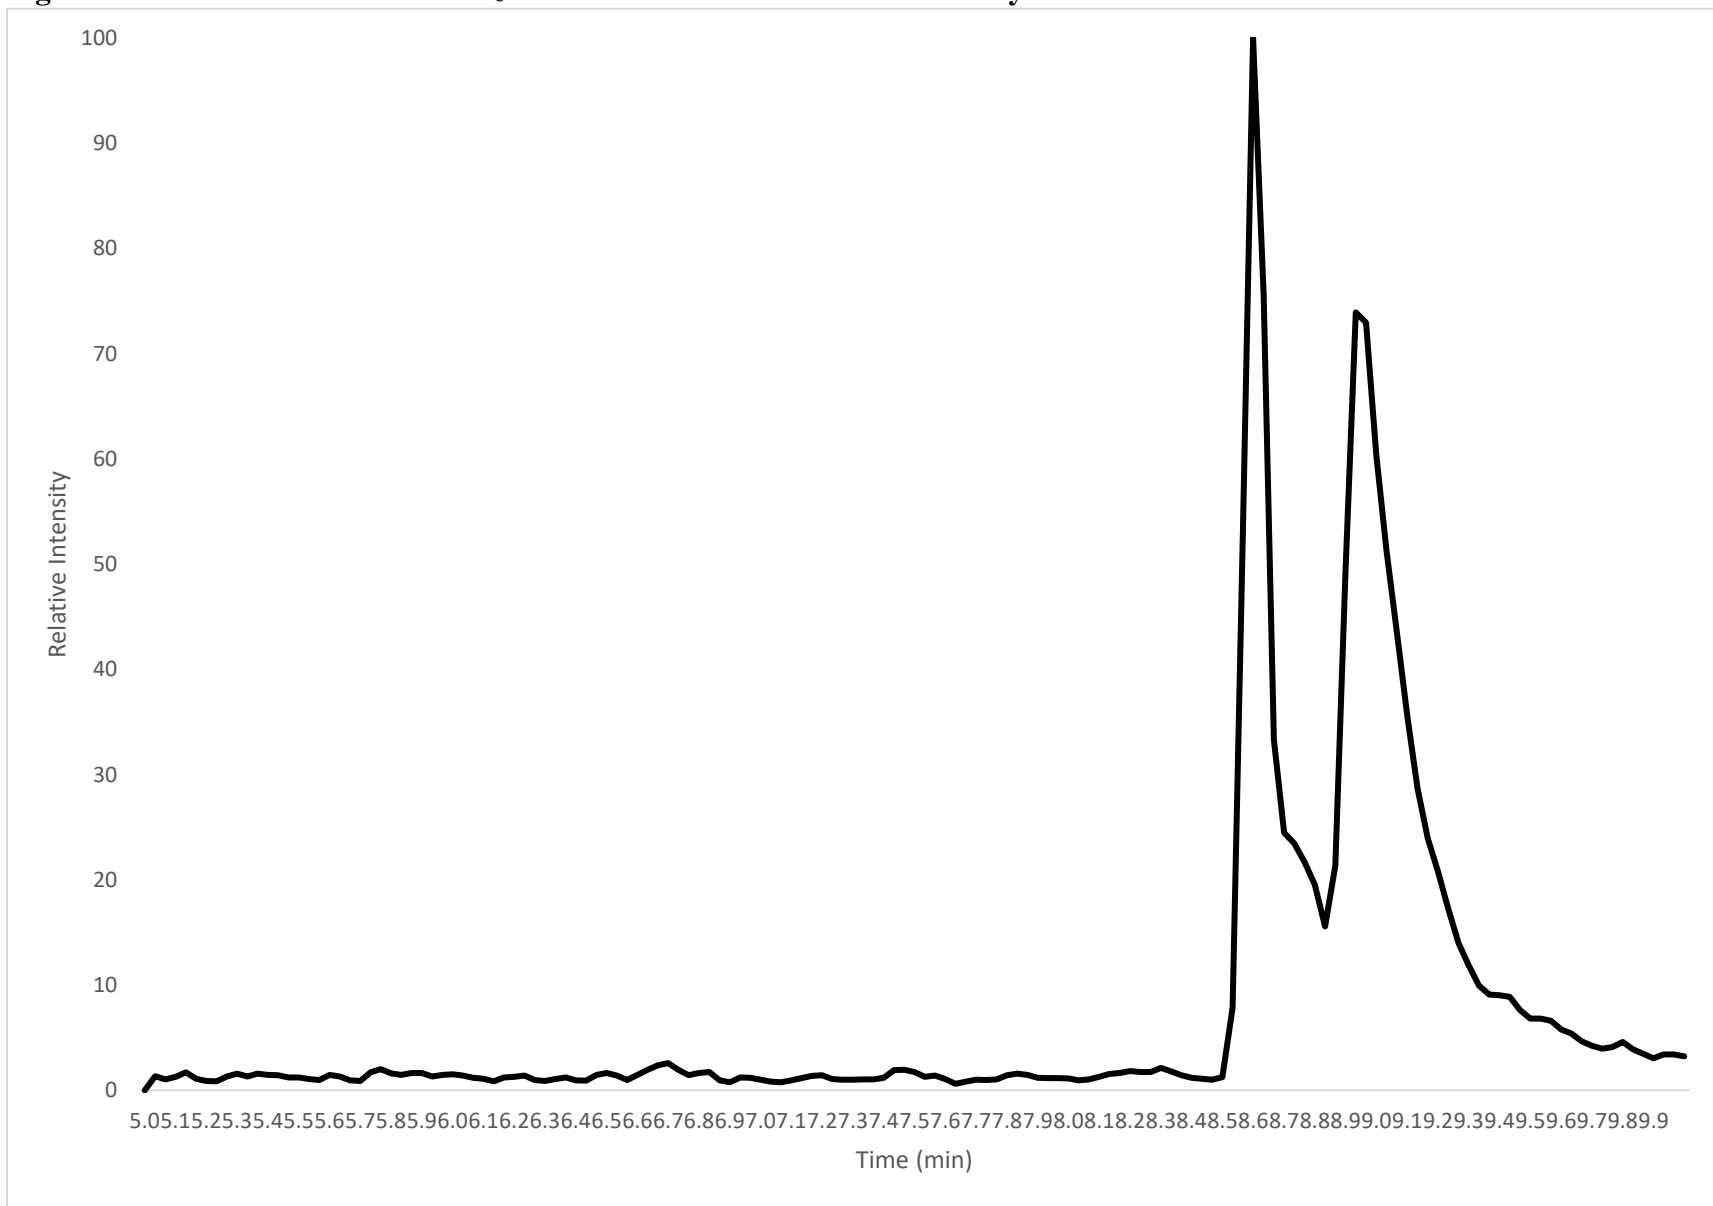

**Figure 61. Selected ion trace for  $m/z$  684-688 for FDAA derivatized L-tyrosine standard.**

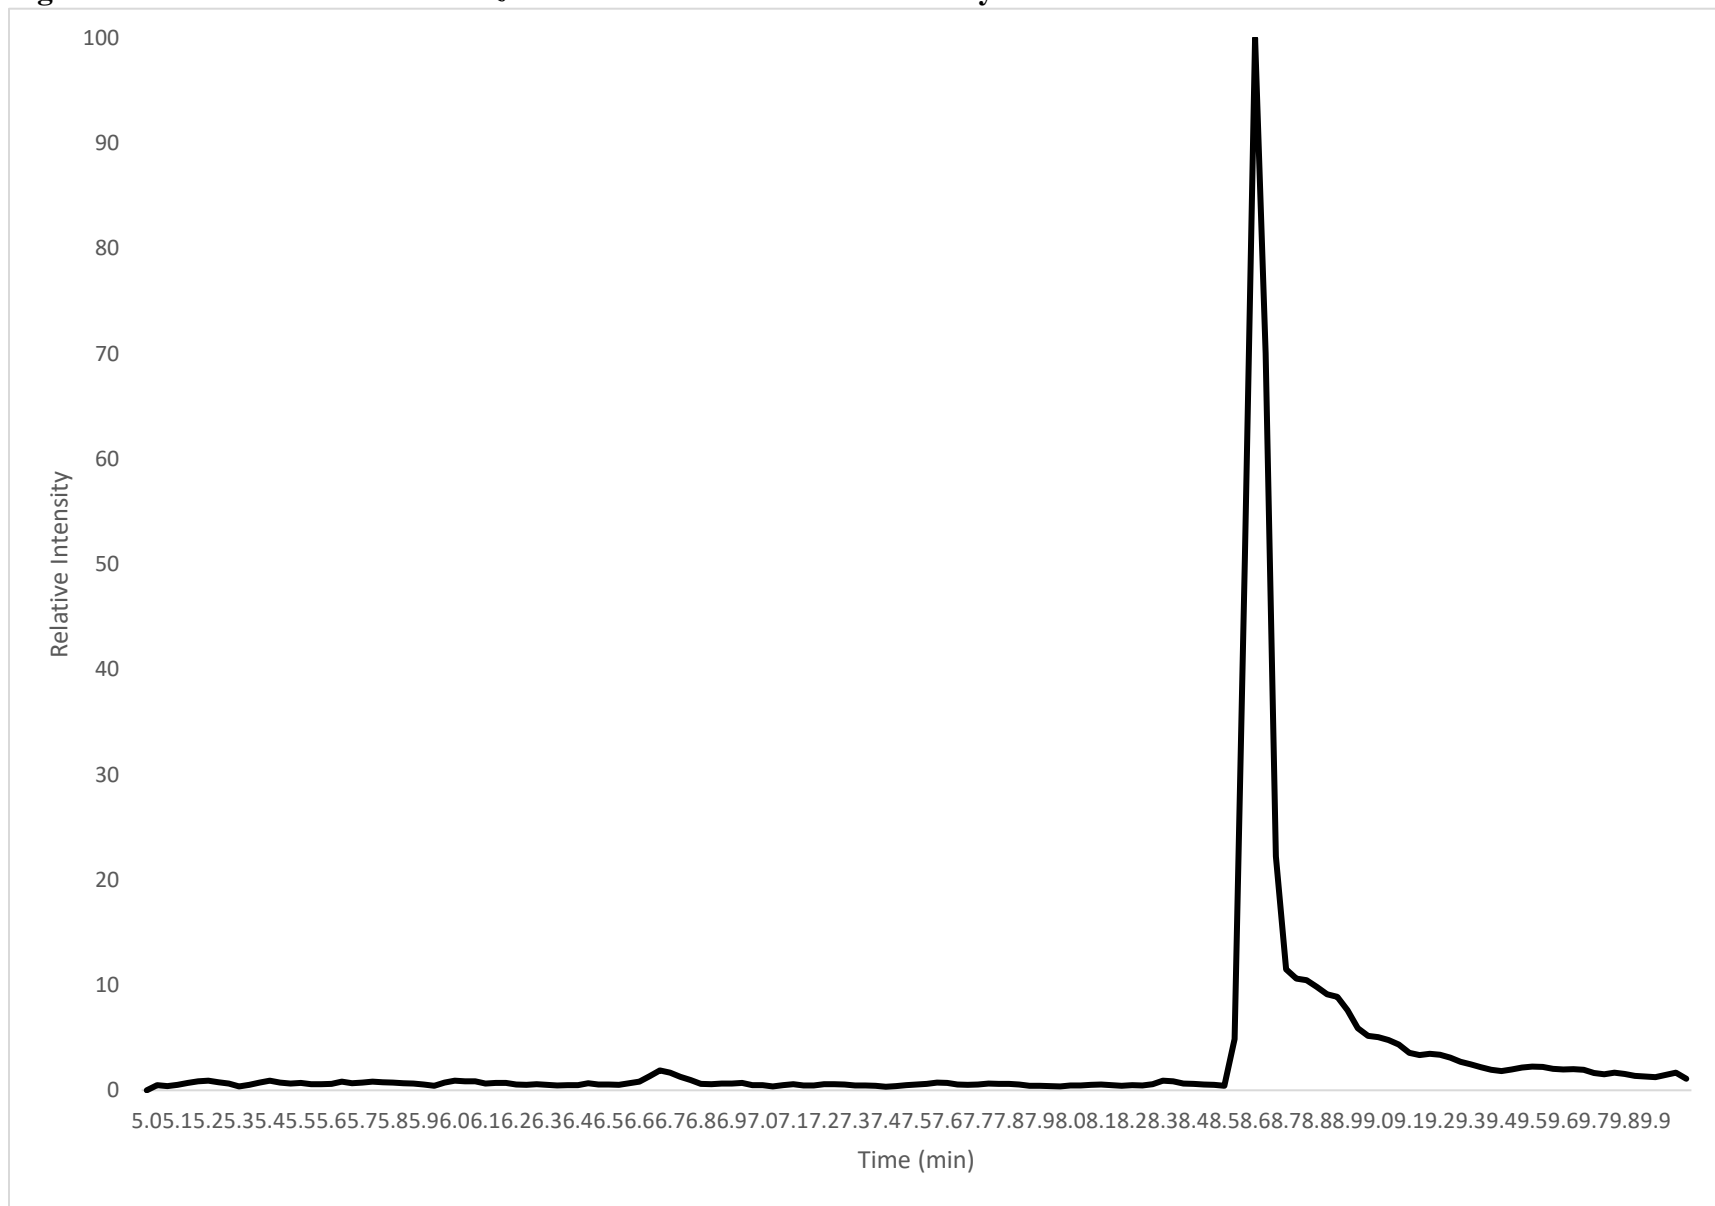

**Table 12.** Summary of Marfey's analysis retention times and peak assignments

|                   | m/z | Retention Time (min) | <b>2</b> | <b>3</b> | <b>4</b> | <b>5</b> |
|-------------------|-----|----------------------|----------|----------|----------|----------|
| D-Leucine         | 384 | 8.30                 | 8.30     | 8.30     | 8.30     | 8.30     |
| L-Leucine         | 384 | 7.83                 |          |          |          |          |
| D-Serine          | 358 | 5.70                 |          |          |          |          |
| L-Serine          | 358 | 5.57                 | 5.57     | 5.57     | 5.57     | 5.53     |
| L-Threonine       | 372 | 8.53                 |          |          |          |          |
| D-allo-Threonine  | 372 | 5.90                 |          |          |          |          |
| L-allo-Threonine  | 372 | 5.73                 | 5.70     | 5.73     | 5.70     | 5.70     |
| D-Phenylalanine   | 418 | 8.17                 | 8.17     | 8.17     | 8.17     |          |
| L-Phenylalanine   | 418 | 7.83                 |          |          |          |          |
| D-Tyrosine        | 434 | 8.87                 |          |          |          | 8.93     |
| L-Tyrosine        | 434 | 8.53                 |          |          |          |          |
| D-Isoleucine      | 384 | 8.23                 |          |          |          |          |
| L-Isoleucine      | 384 | 7.70                 | 7.73     |          | 7.70     | 7.70     |
| D-allo-Isoleucine | 384 | 8.07                 |          |          |          |          |
| L-allo-Isoleucine | 384 | 7.90                 |          |          |          |          |
| D-Valine          | 370 | 7.70                 |          |          |          |          |
| L-Valine          | 370 | 7.20                 |          | 7.17     |          |          |

**Table 13. Reported and observed optical rotation values ( $[\alpha]_D^{20}$ ) for 3-hydroxy fatty acids.**

| Lipid                       | Literature Values            |                                       | Serrawettin W2 (2) |                 | Serrawettin W4 (3) |                 | Serrawettin W5 (4) |                 | Serrawettin W6 (5) |                 |
|-----------------------------|------------------------------|---------------------------------------|--------------------|-----------------|--------------------|-----------------|--------------------|-----------------|--------------------|-----------------|
|                             | CHCl <sub>3</sub>            | EtOH                                  | CHCl <sub>3</sub>  | EtOH            | CHCl <sub>3</sub>  | EtOH            | CHCl <sub>3</sub>  | EtOH            | CHCl <sub>3</sub>  | EtOH            |
| R-3 hydroxy hexanoic acid   | -20.0 (c. 3.0) <sup>1</sup>  |                                       |                    |                 |                    |                 |                    |                 |                    |                 |
| S-3-hydroxy hexanoic acid   | 26.8 (c. 1.1) <sup>2</sup>   |                                       |                    |                 |                    |                 |                    |                 |                    |                 |
| R-3-hydroxy octanoic acid   |                              |                                       |                    |                 |                    |                 | -14.8<br>(c. 0.1)  | 4.9<br>(c. 0.1) |                    |                 |
| S-3-hydroxy octanoic acid   | 14.2 (c. 0.5) <sup>3</sup>   |                                       |                    |                 |                    |                 |                    |                 |                    |                 |
| R-3-hydroxy nonanoic acid   | -20.5 (c. 1.14) <sup>4</sup> |                                       |                    |                 |                    |                 |                    |                 |                    |                 |
| R-3-hydroxy decanoic acid   | -21 (2.5%) <sup>5</sup>      |                                       | -39.0<br>(c. 0.1)  | 5.0<br>(c. 0.1) | -20.0<br>(c. 0.1)  | 4.5<br>(c. 0.1) |                    |                 | -13.3<br>(c. 0.1)  | 4.2<br>(c. 0.1) |
| S-3-hydroxy decanoic acid   | 20 (c. 2.5) <sup>6</sup>     | Flip in sign noted but no value given |                    |                 |                    |                 |                    |                 |                    |                 |
| R-3-hydroxy undecanoic acid | -12 (c. 1.0) <sup>7</sup>    |                                       |                    |                 |                    |                 |                    |                 |                    |                 |
| R-3-hydroxy dodecanoic acid | -17.8 (c. 1.2) <sup>8</sup>  |                                       |                    |                 |                    |                 |                    |                 |                    |                 |

- (1) Le Sann, C.; Munoz, D. M.; Saunders, N.; Simpson, T. J.; Smith, D. I.; Soulas, F.; Watts, P.; Willis, C. L. *Org Biomol Chem* **2005**, *3*, 1719.
- (2) Wang, Y.-C.; Yan, T.-H. *The Journal of Organic Chemistry* **2000**, *65*, 6752.
- (3) Smith, S. M.; Uteuliyev, M.; Takacs, J. M. *Chem Commun (Camb)* **2011**, *47*, 7812.
- (4) Kiho, T.; Nakayama, M.; Yasuda, K.; Miyakoshi, S.; Inukai, M.; Kogen, H. *Bioorganic & Medicinal Chemistry* **2004**, *12*, 337.
- (5) Jarvis, F. G.; Johnson, M. J. *Journal of the American Chemical Society* **1949**, *71*, 4124.
- (6) Serck-Hanssen, K.; Stenhagen, E.; Hanshoff, G.; Prydz, H. *Acta Chemica Scandinavica* **1955**, *9*, 866.
- (7) Utaka, M.; Watabu, H.; Higashi, H.; Sakai, T.; Tsuboi, S.; Torii, S. *The Journal of Organic Chemistry* **1990**, *55*, 3917.
- (8) Guaragna, A.; Nisco, M. D.; Pedatella, S.; Palumbo, G. *Tetrahedron: Asymmetry* **2006**, *17*, 2839.

**Table 14. *Candida albicans* SC5314 biofilm inhibition and growth inhibition properties of compound 1-5.**

| Compound           | The IC <sub>50</sub> <sup>a</sup> for Biofilm inhibition (μM) | The MIC <sup>b</sup> for growth inhibition (μM) |
|--------------------|---------------------------------------------------------------|-------------------------------------------------|
| Viscosin (1)       | 4.63±1.02                                                     | >100                                            |
| Serrawettin W2 (2) | 7.73±0.70                                                     | >100                                            |
| Serrawettin W4 (3) | 59.75±5.69                                                    | >100                                            |
| Serrawettin W5 (4) | 13.41±0.17                                                    | >100                                            |
| Serrawettin W6 (5) | 29.17±0.42                                                    | >100                                            |

<sup>a</sup>IC<sub>50</sub> expressed as the concentration corresponding to 50% of the yeast biofilm formation.

<sup>b</sup>MIC were defined as the lowest concentration causing prominent growth reduction (in ≥80% reduction in the metabolic activity).
